# Supplementary material
Source: PubMed Central journal article supplement (PMC4955699)
Supplement: NIHMS777364-supplement-1.pdf [file NIHMS777364-supplement-1.pdf]

Spot Idx/Pos 181/H17 1 Instr./Spot Origin ab4700/042810 Process Status Analysis Succeeded  
 Plate [#] Name [1] 042810 4700 Sample Name Spectra 13

Rank Protein Name Accession No. Protein MW Protein Score Protein C. I. % Total Ion Score Total Ion C. I. %

| Rank                | Protein Name                             | Accession No. | Protein MW | Protein Score | Protein C. I. % | Total Ion Score          | Total Ion C. I. % |
|---------------------|------------------------------------------|---------------|------------|---------------|-----------------|--------------------------|-------------------|
| 1                   | CTCL tumor antigen se20-7 [Homo sapiens] | gi 11385652   | 73769.5    | 56            | 98.434          |                          |                   |
| Peptide Information |                                          |               |            |               |                 |                          |                   |
| Calc. Mass          | Obsrv. Mass                              | ± da ± ppm    | Start Seq. | End Sequence  | Ion Score       | C. I. % Modification     |                   |
| 1302.7449           | 1302.7048                                | -0.401        | -31        | 125           | 135             | VKGEVVDVMKK              |                   |
| 1332.7191           | 1332.7322                                | 0.0131        | 10         | 95            | 105             | KLKAEEMDEQIK             |                   |
| 1635.8588           | 1635.8796                                | 0.0208        | 13         | 74            | 88              | AAFELEKALSTAGK           |                   |
| 1638.9786           | 1638.9512                                | -0.0276       | -17        | 416           | 429             | ALKDQINQLLELLK           |                   |
| 1722.8591           | 1722.9172                                | 0.0581        | 34         | 163           | 175             | LQTRERFQEQMK             |                   |
| 1764.8948           | 1764.9423                                | 0.0475        | 27         | 167           | 180             | EREFQEQMKVALEK           |                   |
| 1765.9153           | 1765.9631                                | 0.0478        | 27         | 294           | 307             | LQVLKQQYQTEMEK           |                   |
| 1767.9598           | 1767.9252                                | -0.0346       | -20        | 136           | 150             | SSEEQIAKLQKLHEK          |                   |
| 1980.0647           | 1980.1284                                | 0.0637        | 32         | 176           | 192             | VALEKQSEYLVKISQEK        |                   |
| 2008.0344           | 2008.0818                                | 0.0474        | 24         | 71            | 88              | SERAFAFELEKALSTAGK       |                   |
| 2011.0355           | 2011.0939                                | 0.0584        | 29         | 434           | 450             | HLKEHQAHVENLEADIK        |                   |
| 2202.1111           | 2202.1943                                | 0.0832        | 38         | 324           | 341             | EIFQAHHEEMNEKTEK         |                   |
| 2215.175            | 2215.208                                 | 0.033         | 15         | 16            | 34              | NLIEQLEODKGMVIAETK R     |                   |
| 2229.2271           | 2229.2144                                | -0.0127       | -6         | 116           | 134             | ISLQEQLSRVKGEVVDVM K     |                   |
| 2373.2329           | 2373.291                                 | 0.0581        | 24         | 13            | 33              | DAKNLIEQLEQDKGMVIA ETK   |                   |
| 2651.3523           | 2651.4546                                | 0.1023        | 39         | 220           | 241             | DLQQAETRYRTRILELES SLEK  |                   |
| 2783.4182           | 2783.4326                                | 0.0144        | 5          | 393           | 415             | NHHQQQVDSIIKEHEVSI QRTEK |                   |
| 2783.4182           | 2783.4326                                | 0.0144        | 5          | 393           | 415             | NHHQQQVDSIIKEHEVSI QRTEK |                   |

| Rank                | Protein Name                                        | Accession No.    | Protein MW | Protein Score | Protein C. I. % | Total Ion Score           | Total Ion C. I. % |
|---------------------|-----------------------------------------------------|------------------|------------|---------------|-----------------|---------------------------|-------------------|
| 20                  | putative protein product of HMFN0672 [Homo sapiens] | gi 51555 92622.3 | 40         | 28.403        |                 |                           |                   |
| Peptide Information |                                                     |                  |            |               |                 |                           |                   |
| Calc. Mass          | Obsrv. Mass                                         | ± da ± ppm       | Start Seq. | End Sequence  | Ion Score       | C. I. % Modification      |                   |
| 1108.6108           | 1108.6534                                           | 0.0426           | 38         | 59            | 67              | RVLNNTYQK                 |                   |
| 1221.6698           | 1221.7092                                           | 0.0394           | 32         | 556           | 566             | NGIYASRTLAR               |                   |
| 1221.6698           | 1221.7092                                           | 0.0394           | 32         | 556           | 566             | NGIYASRTLAR               |                   |
| 1253.696            | 1253.7197                                           | 0.0237           | 19         | 172           | 181             | LLHRTTELSR                |                   |
| 1284.726            | 1284.7104                                           | -0.0156          | -12        | 444           | 453             | EYRKSLLDK                 |                   |
| 1288.7153           | 1288.7308                                           | 0.0155           | 12         | 386           | 395             | NEMIKLQRTK                |                   |
| 1298.6997           | 1298.7285                                           | 0.0288           | 22         | 756           | 765             | EMEKLRSLR                 |                   |
| 1334.7201           | 1334.7512                                           | 0.0311           | 23         | 494           | 504             | FAEEKVLEK                 |                   |
| 1735.9635           | 1735.9049                                           | -0.0586          | -34        | 551           | 566             | AVCLKNGIYASRTLAR          |                   |
| 1765.9199           | 1765.9631                                           | 0.0432           | 24         | 340           | 355             | ACQRFQCRDVALVITK          |                   |
| 1875.9745           | 1875.9874                                           | 0.0129           | 7          | 312           | 328             | CSVWFVDSIERVSGGR          |                   |
| 2033.996            | 2034.0406                                           | 0.0446           | 22         | 746           | 762             | ELADVGSVEKEMKLR           |                   |
| 2227.2544           | 2227.2356                                           | -0.0188          | -8         | 225           | 244             | IPTSIVITLKAEEAEELSIK R    |                   |
| 2240.2471           | 2240.2817                                           | 0.0346           | 15         | 348           | 366             | DVALVITKMDKLLHPEYL R      |                   |
| 2261.177            | 2261.1936                                           | 0.0166           | 7          | 235           | 253             | AEEAEELSIKLDPIYRTQR       |                   |
| 2299.1975           | 2299.1907                                           | -0.0068          | -3         | 706           | 724             | AQERMQHGFQQLKTGIV EK      |                   |
| 2379.3394           | 2379.2786                                           | -0.0608          | -26        | 630           | 650             | KNFLIQEISAILGGLEDHIL R    |                   |
| 2800.3423           | 2800.4329                                           | 0.0906           | 32         | 2             | 25              | AETKDVFGQEPHPVEDD LYKEPTR |                   |

| Rank                | Protein Name                       | Accession No.    | Protein MW | Protein Score | Protein C. I. % | Total Ion Score                | Total Ion C. I. % |
|---------------------|------------------------------------|------------------|------------|---------------|-----------------|--------------------------------|-------------------|
| 28                  | dynamin 2 isoform 3 [Homo sapiens] | gi 56549 97590.9 | 38         | 1.168         |                 |                                |                   |
| Peptide Information |                                    |                  |            |               |                 |                                |                   |
| Calc. Mass          | Obsrv. Mass                        | ± da ± ppm       | Start Seq. | End Sequence  | Ion Score       | C. I. % Modification           |                   |
| 991.5683            | 991.6061                           | 0.0378           | 38         | 446           | 453             | LSSYPRLR                       |                   |
| 1106.5914           | 1106.6289                          | 0.0375           | 34         | 559           | 567             | YMLPLDLNK                      |                   |
| 1158.6729           | 1158.6517                          | -0.0212          | -18        | 300           | 309             | LQSLLSLEK                      |                   |
| 1348.7471           | 1348.7173                          | -0.0298          | -22        | 654           | 665             | NLVDSYVAIINK                   |                   |
| 1474.776            | 1474.8234                          | 0.0474           | 32         | 316           | 327             | NFRPDDPRKTK                    |                   |
| 1621.8835           | 1621.936                           | 0.0525           | 32         | 400           | 414             | TGLFDPDAFEAVIK                 |                   |
| 1635.8448           | 1635.8796                          | 0.0348           | 21         | 446           | 458             | LSSYPRLREETER                  |                   |
| 1735.9125           | 1735.9049                          | -0.0076          | -4         | 45            | 59              | SSVLENFVGRDFLR                 |                   |
| 1762.9445           | 1762.884                           | -0.0605          | -34        | 230           | 245             | GYIGVNRNSOKDIEGK               |                   |
| 1875.9435           | 1875.9874                          | 0.0439           | 23         | 257           | 271             | KFFLSHPAYRHMADR                |                   |
| 1899.9854           | 1899.9282                          | -0.0572          | -30        | 669           | 684             | DLMKPTIMLHMNNTK                |                   |
| 2254.2666           | 2254.2515                          | -0.0151          | -7         | 846           | 866             | RFPAPSRPTIRPAEPLS LD           |                   |
| 2273.1692           | 2273.1973                          | 0.0281           | 12         | 167           | 188             | ESSLILAVTPANMDLANS DALK        |                   |
| 2289.2634           | 2289.1868                          | -0.0766          | -33        | 654           | 673             | NLVDSYVAIINKSIRDLMK K          |                   |
| 2341.1685           | 2341.2292                          | 0.0607           | 26         | 365           | 382             | IFHERFFPELVKMEFDEK             |                   |
| 2497.2292           | 2497.2791                          | 0.0499           | 20         | 570           | 590             | DVEKGFMSNKHVFAIFNT EQR         |                   |
| 3139.824            | 3139.7295                          | -0.0945          | -30        | 114           | 142             | GISPVPINLRVYSPHVLNL TLIDLPGITK |                   |

| Rank                | Protein Name | Accession No.    | Protein MW | Protein Score | Protein C. I. % | Total Ion Score       | Total Ion C. I. % |
|---------------------|--------------|------------------|------------|---------------|-----------------|-----------------------|-------------------|
| 32                  | golgin-165   | gi 55330 66309.7 | 38         | 0             |                 |                       |                   |
| Peptide Information |              |                  |            |               |                 |                       |                   |
| Calc. Mass          | Obsrv. Mass  | ± da ± ppm       | Start Seq. | End Sequence  | Ion Score       | C. I. % Modification  |                   |
| 1074.6152           | 1074.6427    | 0.0275           | 26         | 415           | 423             | EKEKVNLSK             |                   |
| 1074.6152           | 1074.6427    | 0.0275           | 26         | 415           | 423             | EKEKVNLSK             |                   |
| 1081.5887           | 1081.6162    | 0.0295           | 27         | 341           | 349             | LALELEHEK             |                   |
| 1266.7052           | 1266.7295    | 0.0243           | 19         | 341           | 351             | LALELEHEKGGK          |                   |
| 1266.7052           | 1266.7295    | 0.0243           | 19         | 341           | 351             | LALELEHEKGGK          |                   |
| 1282.6862           | 1282.7196    | 0.0334           | 26         | 127           | 137             | TAEELSRHLR            |                   |
| 1332.7117           | 1332.7322    | 0.0205           | 15         | 7             | 20              | TGDSAALQAVKSGK        |                   |
| 1348.733            | 1348.7173    | -0.0157          | -12        | 229           | 240             | AYENAVGLSRR           |                   |
| 1598.8162           | 1598.829     | 0.0128           | 8          | 113           | 125             | ELRGELMNVHGEK         |                   |
| 1635.8812           | 1635.8796    | -0.0016          | -1         | 5             | 20              | FRTGDSAALQAVKSGK      |                   |
| 1716.865            | 1716.8021    | -0.0629          | -37        | 312           | 325             | EKVLEDELDQESR         |                   |
| 1965.0624           | 1965.0811    | 0.0187           | 10         | 127           | 143             | TAEELSRHLREVAQVR      |                   |
| 2014.0563           | 2014.1117    | 0.0554           | 28         | 530           | 546             | EIQSLKQDLTEQOGR       |                   |
| 2208.2234           | 2208.2935    | 0.0701           | 32         | 275           | 294             | IQALEAELQAVSHSKTLL EK |                   |
| 2208.2234           | 2208.2935    | 0.0701           | 32         | 275           | 294             | IQALEAELQAVSHSKTLL EK |                   |
| 2221.2773           | 2221.239     | -0.0383          | -17        | 376           | 394             | READLVQLNLQVAVLQ RK   |                   |
| 2299.2              | 2299.1907    | -0.0093          | -4         | 528           | 546             | EREIQLKQDLTEQOGR R    |                   |

Spot Idx/Pos 182/H19 2 Instr./Spot Origin ab4700/042810 Process Status Analysis Succeeded  
 Plate [#] Name [1] 042810 4700 Sample Name Spectra 13

Rank Protein Name Accession No. Protein MW Protein Score Protein C. I. % Total Ion Score Total Ion C. I. %

| Rank                | Protein Name                                                                                            | Accession No. | Protein MW | Protein Score | Protein C. I. % | Total Ion Score      | Total Ion C. I. % |
|---------------------|---------------------------------------------------------------------------------------------------------|---------------|------------|---------------|-----------------|----------------------|-------------------|
| 1                   | Splicing factor proline/glutamine-rich (polypyrimidine tract binding protein associated) [Homo sapiens] | gi 29881667   | 76140.7    | 57            | 98.636          |                      |                   |
| Peptide Information |                                                                                                         |               |            |               |                 |                      |                   |
| Calc. Mass          | Obsrv. Mass                                                                                             | ± da ± ppm    | Start Seq. | End Sequence  | Ion Score       | C. I. % Modification |                   |

|           |           |         |    | Seq. | Seq.                       | Score |
|-----------|-----------|---------|----|------|----------------------------|-------|
| 1120.5204 | 1120.5302 | 0.0098  | 9  | 682  | 693 GMGPGTPAGYGR           |       |
| 1143.6288 | 1143.6382 | 0.0114  | 10 | 366  | 376 FATHAALSVR             |       |
| 1143.6288 | 1143.6382 | 0.0114  | 10 | 366  | 376 FATHAALSVR             |       |
| 1153.6384 | 1153.6501 | 0.0137  | 12 | 333  | 342 GFPIKLESR              |       |
| 1267.6211 | 1267.6398 | 0.0187  | 15 | 33   | 44 SPPPGMGLNQR             |       |
| 1341.6656 | 1341.6849 | 0.0193  | 14 | 667  | 681 FGQGGAGPVGGQGR         |       |
| 1341.6656 | 1341.6849 | 0.0193  | 14 | 667  | 681 FGQGGAGPVGGQGR         |       |
| 1347.6776 | 1347.6803 | 0.0027  | 2  | 6    | 18 FRSRGGGGGFHR            |       |
| 1398.7964 | 1398.801  | 0.0046  | 3  | 364  | 376 VRFATHAALSVR           |       |
| 1649.8856 | 1649.9034 | 0.0178  | 11 | 272  | 286 ISDSEGRKMLLLR          |       |
| 1743.8945 | 1743.8977 | 0.0032  | 2  | 343  | 358 ALAEIAKALDDTPMR        |       |
| 1762.7819 | 1762.7941 | 0.0122  | 7  | 480  | 493 FAQHGTFEYYSQR          |       |
| 1762.7819 | 1762.7941 | 0.0122  | 7  | 480  | 493 FAQHGTFEYYSQR          |       |
| 1964.0123 | 1964.0171 | 0.0048  | 2  | 299  | 315 LFGVNLPAIDTEDEPKR      |       |
| 1964.0123 | 1964.0171 | 0.0048  | 2  | 299  | 315 LFGVNLPAIDTEDEPKR      |       |
| 2428.1196 | 2428.1335 | 0.0139  | 6  | 517  | 536 DKLESEMEDAYHEHQANLLR   |       |
| 2639.2986 | 2639.3003 | 0.0017  | 1  | 377  | 399 NLSPIVSNELLEAFSOF      |       |
| 2639.2986 | 2639.3003 | 0.0017  | 1  | 377  | 399 NLSPIVSNELLEAFSOF      |       |
| 2673.2791 | 2673.2612 | -0.0179 | -7 | 243  | 267 GGRQHPPYHQHHQGGPPPGGGR |       |

| Spot Idx/Pos        | 183/H21                                         | 3             | Instr./Spot Origin | ab4700/042810 | Process Status                 | Analysis Succeeded |                      |
|---------------------|-------------------------------------------------|---------------|--------------------|---------------|--------------------------------|--------------------|----------------------|
| Plate [#] Name      | [1] 042810                                      |               | 4700 Sample Name   |               | Spectra                        | 13                 |                      |
| Rank                | Protein Name                                    | Accession No. | Protein MW         | Protein Score | Protein C. I. %                | Total Ion Score    | Total Ion C. I. %    |
| 4                   | tumor rejection antigen (gp96) 1 [Homo sapiens] | gi 4507677    | 92411.3            | 44            | 73.399                         |                    |                      |
| Peptide Information |                                                 |               |                    |               |                                |                    |                      |
| Calc. Mass          | Obsrv. Mass                                     | ± da ± ppm    | Start Seq.         | End Seq.      | Sequence                       | Ion Score          | C. I. % Modification |
| 1015.473            | 1015.4883                                       | 0.0153        | 15                 | 396           | 404 GLFDEYGSK                  |                    |                      |
| 1485.7543           | 1485.766                                        | 0.0117        | 8                  | 435           | 448 GVVDSDLLPLNVR              |                    |                      |
| 1544.8278           | 1544.8228                                       | -0.005        | -3                 | 103           | 116 ELNSASDALDKIR              |                    |                      |
| 1751.8243           | 1751.8429                                       | 0.0186        | 11                 | 415           | 428 RVFITDDFHDMMPK             |                    |                      |
| 1751.8243           | 1751.8429                                       | 0.0186        | 11                 | 415           | 428 RVFITDDFHDMMPK             |                    |                      |
| 2112.1116           | 2112.1108                                       | -0.0008       | 0                  | 143           | 161 NLLHVTDTGVMTRREL           |                    |                      |
| 2260.0627           | 2260.0723                                       | 0.0096        | 4                  | 512           | 530 FOSSHHTDITSLDQYVE          |                    |                      |
| 2260.0627           | 2260.0723                                       | 0.0096        | 4                  | 512           | 530 FOSSHHTDITSLDQYVE          |                    |                      |
| 2265.1145           | 2265.1028                                       | -0.0117       | -5                 | 664           | 683 AQAYGTGKDISTNYAS           |                    |                      |
| 2283.1414           | 2283.1443                                       | 0.0029        | 1                  | 411           | 428 LYVRRVITDDFHDMMPK          |                    |                      |
| 2299.0481           | 2299.0669                                       | 0.0188        | 8                  | 640           | 660 LTESPCALVASQYVGS           |                    |                      |
| 2728.3384           | 2728.3604                                       | 0.022         | 8                  | 44            | 67 TDDEVVOREEEAQLDGL           |                    |                      |
| 2733.4556           | 2733.4648                                       | 0.0092        | 3                  | 701           | 724 KEDEDKTVLDLAVLFL           |                    |                      |
| 3157.5354           | 3157.5505                                       | 0.0151        | 5                  | 40            | 67 EGSRTDDEVVOREEEAQLDGLNASQIR |                    |                      |

| Spot Idx/Pos        | 183/H21                               | 3             | Instr./Spot Origin | ab4700/042810 | Process Status          | Analysis Succeeded |                      |
|---------------------|---------------------------------------|---------------|--------------------|---------------|-------------------------|--------------------|----------------------|
| Plate [#] Name      | [1] 042810                            |               | 4700 Sample Name   |               | Spectra                 | 13                 |                      |
| Rank                | Protein Name                          | Accession No. | Protein MW         | Protein Score | Protein C. I. %         | Total Ion Score    | Total Ion C. I. %    |
| 1                   | premembrane [Dengue virus type 2]     | gi 18308050   | 13563.5            | 45            | 0                       | 4                  | 0                    |
| Peptide Information |                                       |               |                    |               |                         |                    |                      |
| Calc. Mass          | Obsrv. Mass                           | ± da ± ppm    | Start Seq.         | End Seq.      | Sequence                | Ion Score          | C. I. % Modification |
| 1139.5625           | 1139.5715                             | 0.009         | 8                  | 7             | 16 NGEPHMIVSR           | 4                  | 0                    |
| 1139.5625           | 1139.5715                             | 0.009         | 8                  | 7             | 16 NGEPHMIVSR           |                    |                      |
| 1412.6151           | 1412.6093                             | -0.0058       | -4                 | 107           | 118 TETWMSSEGAWK        |                    |                      |
| 1524.7587           | 1524.7587                             | 0             | 0                  | 7             | 19 NGEPHMIVSRQEK        |                    |                      |
| 1565.8468           | 1565.8579                             | 0.0111        | 7                  | 92            | 106 SVALVPHVGMGLETR     |                    |                      |
| 1565.8468           | 1565.8579                             | 0.0111        | 7                  | 92            | 106 SVALVPHVGMGLETR     |                    |                      |
| 2                   | prM (M) protein [Dengue virus type 2] | gi 25059129   | 18859.3            | 40            | 0                       | 4                  | 0                    |
| Peptide Information |                                       |               |                    |               |                         |                    |                      |
| Calc. Mass          | Obsrv. Mass                           | ± da ± ppm    | Start Seq.         | End Seq.      | Sequence                | Ion Score          | C. I. % Modification |
| 1139.5625           | 1139.5715                             | 0.009         | 8                  | 7             | 16 NGEPHMIVSR           | 4                  | 0                    |
| 1139.5625           | 1139.5715                             | 0.009         | 8                  | 7             | 16 NGEPHMIVSR           |                    |                      |
| 1412.6151           | 1412.6093                             | -0.0058       | -4                 | 107           | 118 TETWMSSEGAWK        |                    |                      |
| 1524.7587           | 1524.7587                             | 0             | 0                  | 7             | 19 NGEPHMIVSRQEK        |                    |                      |
| 1565.8468           | 1565.8579                             | 0.0111        | 7                  | 92            | 106 SVALVPHVGMGLETR     |                    |                      |
| 1565.8468           | 1565.8579                             | 0.0111        | 7                  | 92            | 106 SVALVPHVGMGLETR     |                    |                      |
| 15                  | polyprotein [Dengue virus type 2]     | gi 58234      | 17119.3            | 33            | 0                       | 4                  | 0                    |
| Peptide Information |                                       |               |                    |               |                         |                    |                      |
| Calc. Mass          | Obsrv. Mass                           | ± da ± ppm    | Start Seq.         | End Seq.      | Sequence                | Ion Score          | C. I. % Modification |
| 1139.5625           | 1139.5715                             | 0.009         | 8                  | 99            | 108 NGEPHMIVSR          | 4                  | 0                    |
| 1139.5625           | 1139.5715                             | 0.009         | 8                  | 99            | 108 NGEPHMIVSR          |                    |                      |
| 1524.7587           | 1524.7587                             | 0             | 0                  | 99            | 111 NGEPHMIVSRQEK       |                    |                      |
| 3337.7402           | 3337.7163                             | -0.0239       | -7                 | 79            | 108 TAGMIIMLIPTVMAFHLLT |                    |                      |
| 16                  | polyprotein [Dengue virus type 2]     | gi 52219      | 17111.2            | 33            | 0                       | 4                  | 0                    |
| Peptide Information |                                       |               |                    |               |                         |                    |                      |
| Calc. Mass          | Obsrv. Mass                           | ± da ± ppm    | Start Seq.         | End Seq.      | Sequence                | Ion Score          | C. I. % Modification |
| 1139.5625           | 1139.5715                             | 0.009         | 8                  | 99            | 108 NGEPHMIVSR          | 4                  | 0                    |
| 1139.5625           | 1139.5715                             | 0.009         | 8                  | 99            | 108 NGEPHMIVSR          |                    |                      |
| 1524.7587           | 1524.7587                             | 0             | 0                  | 99            | 111 NGEPHMIVSRQEK       |                    |                      |
| 3337.7402           | 3337.7163                             | -0.0239       | -7                 | 79            | 108 TVGMIMLIPTVMAFHLLT  |                    |                      |
| 2                   | NME1-NME2 protein [Homo sapiens]      | gi 66392203   | 30117.6            | 29            | 0                       |                    |                      |
| Peptide Information |                                       |               |                    |               |                         |                    |                      |
| Calc. Mass          | Obsrv. Mass                           | ± da ± ppm    | Start Seq.         | End Seq.      | Sequence                | Ion Score          | C. I. % Modification |
| 1344.7633           | 1344.7715                             | 0.0082        | 6                  | 7             | 18 TFLAIKPDGVQR         |                    |                      |
| 1344.7633           | 1344.7715                             | 0.0082        | 6                  | 122           | 133 TFLAIKPDGVQR        |                    |                      |
| 1785.9163           | 1785.9147                             | -0.0016       | -1                 | 204           | 220 VMLGETNPADSKPGTIR   |                    |                      |
| 1785.9163           | 1785.9147                             | -0.0016       | -1                 | 89            | 105 VMLGETNPADSKPGTIR   |                    |                      |

| Spot Idx/Pos        | 184/H23                          | 4             | Instr./Spot Origin | ab4700/042810 | Process Status        | Analysis Succeeded |                      |
|---------------------|----------------------------------|---------------|--------------------|---------------|-----------------------|--------------------|----------------------|
| Plate [#] Name      | [1] 042810                       |               | 4700 Sample Name   |               | Spectra               | 13                 |                      |
| Rank                | Protein Name                     | Accession No. | Protein MW         | Protein Score | Protein C. I. %       | Total Ion Score    | Total Ion C. I. %    |
| 4                   | NME1-NME2 protein [Homo sapiens] | gi 66392203   | 30117.6            | 23            | 0                     |                    |                      |
| Peptide Information |                                  |               |                    |               |                       |                    |                      |
| Calc. Mass          | Obsrv. Mass                      | ± da ± ppm    | Start Seq.         | End Seq.      | Sequence              | Ion Score          | C. I. % Modification |
| 1344.7633           | 1344.7639                        | 0.0006        | 0                  | 122           | 133 TFLAIKPDGVQR      |                    |                      |
| 1344.7633           | 1344.7639                        | 0.0006        | 0                  | 7             | 18 TFLAIKPDGVQR       |                    |                      |
| 1785.9163           | 1785.9246                        | 0.0083        | 5                  | 89            | 105 VMLGETNPADSKPGTIR |                    |                      |
| 1785.9163           | 1785.9246                        | 0.0083        | 5                  | 204           | 220 VMLGETNPADSKPGTIR |                    |                      |

| Spot Idx/Pos   | 193/H14                         | 5             | Instr./Spot Origin | ab4700/042810 | Process Status  | Analysis Succeeded |                   |
|----------------|---------------------------------|---------------|--------------------|---------------|-----------------|--------------------|-------------------|
| Plate [#] Name | [1] 042810                      |               | 4700 Sample Name   |               | Spectra         | 13                 |                   |
| Rank           | Protein Name                    | Accession No. | Protein MW         | Protein Score | Protein C. I. % | Total Ion Score    | Total Ion C. I. % |
| 1              | splicing factor homolog - human | gi 543010     | 54233.3            | 65            | 99.794          |                    |                   |

Peptide Information

| Calc. Mass | Obsrv. Mass | ± da ± ppm | Start Seq. | End Sequence Seq. | Ion Score | C. I. %                                    | Modification |
|------------|-------------|------------|------------|-------------------|-----------|--------------------------------------------|--------------|
| 1147.6179  | 1147.6321   | 0.0142     | 12         | 271               | 279       | WKALIEMEK                                  |              |
| 1195.6581  | 1195.6519   | -0.0062    | -5         | 110               | 119       | FGFIRLETR                                  |              |
| 1231.6792  | 1231.6819   | 0.0027     | 2          | 191               | 202       | GIVFSGKPAAR                                |              |
| 1248.6735  | 1248.6707   | -0.0028    | -2         | 97                | 107       | YGKAEVFIHK                                 |              |
| 1457.7706  | 1457.7668   | -0.0038    | -3         | 338               | 348       | KQLLELROEER                                |              |
| 1538.6694  | 1538.6843   | 0.0149     | 10         | 384               | 398       | MGQMAMGAMGINNR                             |              |
| 1695.7471  | 1695.7589   | 0.0118     | 7          | 257               | 270       | FAQPGSFYEYAMR                              |              |
| 1695.7471  | 1695.7589   | 0.0118     | 7          | 257               | 270       | FAQPGSFYEYAMR                              |              |
| 1812.9888  | 1812.989    | 0.0002     | 0          | 120               | 135       | TLAEIAKVELDNMPLR                           |              |
| 1814.0031  | 1813.995    | -0.0081    | -4         | 185               | 202       | GRPSGKGVFSGKPAA<br>R                       |              |
| 1859.9207  | 1859.9332   | 0.0125     | 7          | 76                | 91        | LFVGNLPPDITEEMR                            |              |
| 1859.9207  | 1859.9332   | 0.0125     | 7          | 76                | 91        | LFVGNLPPDITEEMR                            |              |
| 1880.0183  | 1879.993    | -0.0253    | -13        | 138               | 153       | QLRVRFACHSASLHVR                           |              |
| 1988.0156  | 1988.0286   | 0.013      | 7          | 76                | 92        | LFVGNLPPDITEEMRK                           |              |
| 2163.0649  | 2163.074    | 0.0091     | 4          | 435               | 456       | FGQAATMEGIGAIGGTPP<br>AFNR                 |              |
| 2163.0649  | 2163.074    | 0.0091     | 4          | 435               | 456       | FGQAATMEGIGAIGGTPP<br>AFNR                 |              |
| 2231.1487  | 2231.1167   | -0.032     | -14        | 74                | 92        | SRLFVGNLPPDITEEMR<br>K                     |              |
| 2498.177   | 2498.1924   | 0.0154     | 6          | 294               | 313       | EKLEMEMEARHEHQVM<br>LMR                    |              |
| 2668.3252  | 2668.3274   | 0.0022     | 1          | 154               | 176       | NLPQYVSNELLEAFSVF<br>GQVER                 |              |
| 2668.3252  | 2668.3274   | 0.0022     | 1          | 154               | 176       | NLPQYVSNELLEAFSVF<br>GQVER                 |              |
| 3451.7058  | 3451.7124   | 0.0066     | 2          | 399               | 434       | GAMPPAPVPAGTPAPP<br>PATMMPDGLGLTPPTT<br>ER |              |

12 polypyrimidine tract-binding protein 1 isoform c [Homo sapiens] gi|14165466 57185.6 24 0

Peptide Information

| Calc. Mass | Obsrv. Mass | ± da ± ppm | Start Seq. | End Sequence Seq. | Ion Score | C. I. %                                        | Modification |
|------------|-------------|------------|------------|-------------------|-----------|------------------------------------------------|--------------|
| 1184.6521  | 1184.6644   | 0.0123     | 10         | 2                 | 13        | DGIVPDIAGTK                                    |              |
| 1431.7379  | 1431.7369   | -0.001     | -1         | 123               | 134       | GQPIYQFSNHK                                    |              |
| 2039.0959  | 2039.0962   | 0.0003     | 0          | 349               | 366       | VTPQSLFLFGVYGVDR                               |              |
| 2039.0959  | 2039.0962   | 0.0003     | 0          | 349               | 366       | VTPQSLFLFGVYGVDR                               |              |
| 2144.0002  | 2144.0244   | 0.0242     | 11         | 419               | 437       | EGQEDQGLTKDYGNSPL<br>HR                        |              |
| 2275.2766  | 2275.2791   | 0.0025     | 1          | 326               | 348       | IAIPLAGAGNSVLLVSNL<br>NPER                     |              |
| 2275.2766  | 2275.2791   | 0.0025     | 1          | 326               | 348       | IAIPLAGAGNSVLLVSNL<br>NPER                     |              |
| 3206.5132  | 3206.5435   | 0.0303     | 9          | 95                | 122       | NGAFIEMNTEEAANTMV<br>NYTSTVPLR                 |              |
| 3391.6296  | 3391.6753   | 0.0457     | 13         | 93                | 122       | GKNOAFIEMNTEEAANT<br>MVNYTSTVPLR               |              |
| 3680.8845  | 3680.8735   | -0.011     | -3         | 147               | 185       | AQAALQAVNSVQSGNLA<br>LAASAAVDAGMAMAGQ<br>SPVLR |              |

Spot Idx/Pos 138/F4 6 Instr./Spot Origin ab4700/042810 Process Status Analysis Succeeded  
 Plate # Name [1] 042810 4700 Sample Name Spectra 13

Rank Protein Name Accession No. Protein MW Protein Score Protein C. I. % Total Ion Score Total Ion C. I. %

1 non-POU domain containing, octamer-binding [Homo sapiens] gi|34932414 54197.3 87 99.999

Protein Group

splicing factor homolog - human gi|543010 54233.3

Peptide Information

| Calc. Mass | Obsrv. Mass | ± da ± ppm | Start Seq. | End Sequence Seq. | Ion Score | C. I. %                                    | Modification |
|------------|-------------|------------|------------|-------------------|-----------|--------------------------------------------|--------------|
| 1147.6179  | 1147.5594   | -0.0585    | -51        | 271               | 279       | WKALIEMEK                                  |              |
| 1180.5714  | 1180.5752   | 0.0038     | 3          | 305               | 313       | HEHVMMLMR                                  |              |
| 1195.6581  | 1195.5901   | -0.068     | -57        | 110               | 119       | FGFIRLETR                                  |              |
| 1336.6235  | 1336.6051   | -0.0184    | -14        | 294               | 304       | EKLEMEMEAR                                 |              |
| 1480.7179  | 1480.6635   | -0.0544    | -37        | 366               | 378       | QOEGFKGTFPDR                               |              |
| 1538.6694  | 1538.6031   | -0.0663    | -43        | 384               | 398       | MGQMAMGAMGINNR                             |              |
| 1538.6694  | 1538.6031   | -0.0663    | -43        | 384               | 398       | MGQMAMGAMGINNR                             |              |
| 1636.819   | 1636.7764   | -0.0526    | -26        | 365               | 378       | RQEGFKGTFPDR                               |              |
| 1695.7471  | 1695.6763   | -0.0708    | -42        | 257               | 270       | FAQPGSFYEYAMR                              |              |
| 1695.7471  | 1695.6763   | -0.0708    | -42        | 257               | 270       | FAQPGSFYEYAMR                              |              |
| 1812.9888  | 1812.8975   | -0.0913    | -50        | 120               | 135       | TLAEIAKVELDNMPLR                           |              |
| 1824.8479  | 1824.8483   | 0.0004     | 0          | 358               | 371       | QOEMRRQOEGFK                               |              |
| 1859.9207  | 1859.8271   | -0.0936    | -50        | 76                | 91        | LFVGNLPPDITEEMR                            |              |
| 1859.9207  | 1859.8271   | -0.0936    | -50        | 76                | 91        | LFVGNLPPDITEEMR                            |              |
| 2163.0649  | 2162.9634   | -0.1015    | -47        | 435               | 456       | FGQAATMEGIGAIGGTPP<br>AFNR                 |              |
| 2163.0649  | 2162.9634   | -0.1015    | -47        | 435               | 456       | FGQAATMEGIGAIGGTPP<br>AFNR                 |              |
| 2231.1487  | 2231.0532   | -0.0955    | -43        | 74                | 92        | SRLFVGNLPPDITEEMR<br>K                     |              |
| 2303.0549  | 2303.0408   | -0.0141    | -6         | 252               | 270       | EQPRFAQPGSFYEY<br>MR                       |              |
| 2498.177   | 2498.0669   | -0.1101    | -44        | 294               | 313       | EKLEMEMEARHEHQVM<br>LMR                    |              |
| 2668.3252  | 2668.187    | -0.1382    | -52        | 154               | 176       | NLPQYVSNELLEAFSVF<br>GQVER                 |              |
| 2668.3252  | 2668.187    | -0.1382    | -52        | 154               | 176       | NLPQYVSNELLEAFSVF<br>GQVER                 |              |
| 3451.7058  | 3451.4951   | -0.2107    | -61        | 399               | 434       | GAMPPAPVPAGTPAPP<br>PATMMPDGLGLTPPTT<br>ER |              |

3 heterogeneous nuclear ribonucleoprotein M isoform b [Homo sapiens] gi|14141154 73512.3 65 99.774

Peptide Information

| Calc. Mass | Obsrv. Mass | ± da ± ppm | Start Seq. | End Sequence Seq. | Ion Score | C. I. %                      | Modification |
|------------|-------------|------------|------------|-------------------|-----------|------------------------------|--------------|
| 1167.5833  | 1167.5872   | 0.0039     | 3          | 620               | 628       | NLPDFTWK                     |              |
| 1214.5759  | 1214.6051   | 0.0292     | 24         | 38                | 48        | GEGERPAONEK                  |              |
| 1336.671   | 1336.6051   | -0.0659    | -49        | 647               | 659       | MENKSKGCGVVK                 |              |
| 1383.6143  | 1383.5405   | -0.0738    | -53        | 568               | 582       | MGLAMGGGGASDR                |              |
| 1480.7069  | 1480.6635   | -0.0434    | -29        | 398               | 410       | MGLVMDRMGSVER                |              |
| 1550.7413  | 1550.8208   | 0.0795     | 51         | 433               | 446       | MGQTMERIGSGVER               |              |
| 1550.7413  | 1550.8208   | 0.0795     | 51         | 433               | 446       | MGQTMERIGSGVER               |              |
| 1715.8164  | 1715.8145   | -0.0019    | -1         | 113               | 127       | GCAVVEFKMEESMK               |              |
| 1739.9591  | 1739.87     | -0.0891    | -51        | 70                | 83        | RYRAFITNIPFDVK               |              |
| 1821.9163  | 1821.8356   | -0.0807    | -44        | 652               | 668       | SKGCGVVKFESPEVAER            |              |
| 2163.0476  | 2162.9634   | -0.0842    | -39        | 589               | 612       | GNFGGSFAGSFGGAGG<br>HAPGVARK |              |
| 2163.0476  | 2162.9634   | -0.0842    | -39        | 589               | 612       | GNFGGSFAGSFGGAGG<br>HAPGVARK |              |
| 2211.05    | 2210.9856   | -0.0644    | -29        | 398               | 417       | MGLVMDRMGSVERMGS             |              |

|           |           |         |     |     |     |                            |
|-----------|-----------|---------|-----|-----|-----|----------------------------|
| 2249.0947 | 2248.9844 | -0.1103 | -49 | 512 | 531 | MATGLERMGANNLERMGLER       |
| 2273.1487 | 2273.0679 | -0.0808 | -36 | 465 | 485 | VGQTIERMGSVERMGP           |
| 2283.0896 | 2283.0515 | -0.0381 | -17 | 634 | 653 | FNECGHLYADIKMENGKSK        |
| 2599.2107 | 2599.2087 | -0.002  | -1  | 365 | 390 | MSPGIDRLGGAGMERM           |
| 2733.3125 | 2733.1404 | -0.1721 | -63 | 493 | 518 | MVPAGMGAGLERMGPVMDRMATGLER |
| 2829.416  | 2829.2468 | -0.1692 | -60 | 95  | 120 | VGEVTVYVLLMDAEGKSRGCAVVEFK |

12 ZNF225 [amino acids 79-706] [Homo sapiens] gi|9502402 73081.2 56 98.283

| Peptide Information |             |            |            |                   |           |                      |              |
|---------------------|-------------|------------|------------|-------------------|-----------|----------------------|--------------|
| Calc. Mass          | Obsrv. Mass | ± da ± ppm | Start Seq. | End Sequence Seq. | Ion Score | C. I. %              | Modification |
| 1044.5221           | 1044.4824   | -0.0397    | -38        | 343               | 351       | AHSGEKPYR            |              |
| 1380.6654           | 1380.621    | -0.0444    | -32        | 443               | 453       | FTQNSQLYSHR          |              |
| 1403.6558           | 1403.5857   | -0.0701    | -50        | 268               | 278       | CEECGKRFYR           |              |
| 1550.7822           | 1550.8208   | 0.0386     | 25         | 415               | 426       | FTQNSQLYTHRR         |              |
| 1550.7822           | 1550.8206   | 0.0386     | 25         | 414               | 425       | RFTQNSQLYTHR         |              |
| 1566.7805           | 1566.735    | -0.0455    | -29        | 251               | 264       | SALNSHRMVTGEEK       |              |
| 1695.765            | 1695.6763   | -0.0887    | -52        | 119               | 133       | VHMGEKLYNCDVCGK      |              |
| 1695.765            | 1695.6763   | -0.0887    | -52        | 119               | 133       | VHMGEKLYNCDVCGK      |              |
| 1715.8361           | 1715.8145   | -0.0216    | -13        | 338               | 351       | YSHORAHSGEKPYR       |              |
| 1729.8993           | 1729.8163   | -0.083     | -48        | 557               | 570       | WASTHLTHORLHSR       |              |
| 1815.8879           | 1815.8359   | -0.052     | -29        | 235               | 250       | EKPFKCDTQKGSFLK      |              |
| 1875.8839           | 1875.8468   | -0.0371    | -20        | 511               | 526       | LHGDEKPFKCECGKR      |              |
| 1923.9163           | 1923.8796   | -0.0367    | -19        | 240               | 257       | CDTQKGSFLKLSALNSHR   |              |
| 2077.1301           | 2077.051    | -0.0791    | -38        | 502               | 519       | ASSLNHKLRLHGDEKPFK   |              |
| 2211.0684           | 2210.9856   | -0.0828    | -37        | 455               | 474       | VHTGVKPKYKCECGKGFNSK |              |
| 2242.979            | 2243.0322   | 0.0532     | 24         | 464               | 482       | CEECGKGFNSKFLNMDHQR  |              |
| 2249.1064           | 2248.9844   | -0.122     | -54        | 106               | 124       | SFCYSSALRIHQRVHMGEK  |              |

Spot Idx/Pos 194/H16 7 Instr./Spot Origin ab4700/042810 Process Status Analysis Succeeded  
 Plate # Name [1] 042810 Accession No. Protein MW Protein Score Protein C. I. % Total Ion Score Total Ion C. I. % Spectra 13

| Peptide Information |             |            |            |                   |           |                     |              |
|---------------------|-------------|------------|------------|-------------------|-----------|---------------------|--------------|
| Calc. Mass          | Obsrv. Mass | ± da ± ppm | Start Seq. | End Sequence Seq. | Ion Score | C. I. %             | Modification |
| 975.5105            | 975.512     | 0.0015     | 2          | 319               | 326       | SEVKDEIR            |              |
| 1360.7001           | 1360.6941   | -0.006     | -4         | 295               | 305       | KGMANQKDLER         |              |
| 1491.7537           | 1491.7567   | 0.003      | 2          | 140               | 152       | ESEESKLDVLSK        |              |
| 1647.837            | 1647.8448   | 0.0078     | 5          | 195               | 209       | SGELLALQKEADSMR     |              |
| 1678.8767           | 1678.8824   | 0.0057     | 3          | 125               | 137       | LVQEQMMFQRLQK       |              |
| 1708.8687           | 1708.8544   | -0.0143    | -8         | 169               | 182       | WCESEKLTLSQTKR      |              |
| 1837.9918           | 1838.0012   | 0.0094     | 5          | 210               | 224       | ADFSLLRNQFLTERK     |              |
| 1840.9398           | 1840.9482   | 0.0084     | 5          | 108               | 122       | QQQLQVLONEIEENK     |              |
| 2034.9912           | 2034.9933   | 0.0021     | 1          | 160               | 175       | VRTLOEEERWCESEK     |              |
| 2217.1042           | 2217.1138   | 0.0096     | 4          | 278               | 294       | RLMKELNMQMVEYTELK   |              |
| 2226.1182           | 2226.1306   | 0.0124     | 6          | 26                | 44        | DKLSLHNDISAMQQQLQEK |              |
| 2262.1836           | 2262.1836   | 0          | 0          | 67                | 85        | QDLHHTTKHQDVLLESEQR |              |
| 2338.1509           | 2338.1682   | 0.0173     | 7          | 377               | 395       | LNFSQVHIMDEHWRGEALR |              |

| Peptide Information |             |            |            |                   |           |                            |              |
|---------------------|-------------|------------|------------|-------------------|-----------|----------------------------|--------------|
| Calc. Mass          | Obsrv. Mass | ± da ± ppm | Start Seq. | End Sequence Seq. | Ion Score | C. I. %                    | Modification |
| 1199.6742           | 1199.6604   | -0.1138    | -12        | 101               | 112       | DAGTIAGLVNLR               |              |
| 1235.624            | 1235.632    | 0.008      | 6          | 178               | 187       | MVNHFAIEFK                 |              |
| 1252.6605           | 1252.6497   | -0.0108    | -9         | 68                | 78        | MKEIAEAYLGK                |              |
| 1253.616            | 1253.6311   | 0.0151     | 12         | 243               | 252       | FEELNADLFR                 |              |
| 1391.7252           | 1391.7244   | -0.0008    | -1         | 178               | 188       | MVNHFAIEFKR                |              |
| 1480.7543           | 1480.7609   | 0.0066     | 4          | 241               | 252       | ARFEELNADLFR               |              |
| 1480.7543           | 1480.7609   | 0.0066     | 4          | 241               | 252       | ARFEELNADLFR               |              |
| 1652.8318           | 1653.8531   | 0.0213     | 13         | 30                | 43        | HWPFMVDAGRPK               |              |
| 1745.8088           | 1745.7985   | -0.0103    | -6         | 525               | 538       | NOTAEKEEFHQOK              |              |
| 1838.0129           | 1838.0012   | -0.0117    | -6         | 267               | 283       | LDKSQIHDVLVGGSTR           |              |
| 1952.0599           | 1952.035    | -0.0249    | -13        | 393               | 410       | DNLLGKFLTGIPAPR            |              |
| 1981.9977           | 1981.9973   | -0.0004    | 0          | 79                | 96        | VTNAVVTVPYFNDSSQR          |              |
| 1981.9977           | 1981.9973   | -0.0004    | 0          | 79                | 96        | VTNAVVTVPYFNDSSQR          |              |
| 2774.3267           | 2774.3303   | 0.0036     | 1          | 365               | 388       | QTQFTTYSQNPQVLIQVVEGER     |              |
| 2997.4575           | 2997.4656   | 0.0081     | 3          | 214               | 240       | TSSSTOASIEIDSLYEGIDFYTSITR |              |

| Peptide Information |             |            |            |                   |           |                       |              |
|---------------------|-------------|------------|------------|-------------------|-----------|-----------------------|--------------|
| Calc. Mass          | Obsrv. Mass | ± da ± ppm | Start Seq. | End Sequence Seq. | Ion Score | C. I. %               | Modification |
| 975.5105            | 975.512     | 0.0015     | 2          | 831               | 838       | SEVKDEIR              |              |
| 1187.6378           | 1187.6272   | -0.0106    | -9         | 477               | 487       | RVLAAAEENSK           |              |
| 1360.7001           | 1360.6941   | -0.006     | -4         | 807               | 817       | KGMANQKDLER           |              |
| 1443.755            | 1443.7632   | 0.0082     | 6          | 163               | 175       | ADQQLRSLOADAK         |              |
| 1524.7726           | 1524.7831   | 0.0105     | 7          | 194               | 207       | IVAAKDSDFQCLSK        |              |
| 1524.7726           | 1524.7831   | 0.0105     | 7          | 194               | 207       | IVAAKDSDFQCLSK        |              |
| 1551.7496           | 1551.7626   | 0.013      | 8          | 625               | 637       | ERESEESKLETSK         |              |
| 1647.837            | 1647.8448   | 0.0078     | 5          | 707               | 721       | SGELLALQKEADSMR       |              |
| 1678.8767           | 1678.8824   | 0.0057     | 3          | 612               | 624       | LVQEQMMFQRLQK         |              |
| 1708.8687           | 1708.8544   | -0.0143    | -8         | 681               | 694       | WCESEKLTLSQTKR        |              |
| 1799.8955           | 1799.9078   | 0.0123     | 7          | 41                | 55        | SLECEVEELHRTVQK       |              |
| 1837.9918           | 1838.0012   | 0.0094     | 5          | 722               | 736       | ADFSLLRNQFLTERK       |              |
| 1840.9398           | 1840.9482   | 0.0084     | 5          | 595               | 609       | QQQLQVLONEIEENK       |              |
| 2034.9912           | 2034.9933   | 0.0021     | 1          | 672               | 687       | VRTLOEEERWCESEK       |              |
| 2217.1042           | 2217.1138   | 0.0096     | 4          | 790               | 806       | RLMKELNMQMVEYTELK     |              |
| 2226.1182           | 2226.1306   | 0.0124     | 6          | 513               | 531       | DKLSLHNDISAMQQQLQEK   |              |
| 2262.1836           | 2262.1836   | 0          | 0          | 554               | 572       | QDLHHTTKHQDVLLESEQR   |              |
| 2283.1509           | 2283.1655   | 0.0146     | 6          | 256               | 275       | SQVTSQQQEMAVLDRQLGHIK |              |
| 2338.1521           | 2338.1682   | 0.0161     | 7          | 132               | 151       | FTDAKRSLLQTESDAEELER  |              |

| Peptide Information |             |            |            |                   |           |              |              |
|---------------------|-------------|------------|------------|-------------------|-----------|--------------|--------------|
| Calc. Mass          | Obsrv. Mass | ± da ± ppm | Start Seq. | End Sequence Seq. | Ion Score | C. I. %      | Modification |
| 1199.6742           | 1199.6604   | -0.1138    | -12        | 160               | 171       | DAGTIAGLVNLR |              |

|           |           |         |    |     |     |                                 |
|-----------|-----------|---------|----|-----|-----|---------------------------------|
| 1235.624  | 1235.632  | 0.008   | 6  | 237 | 246 | MVNHFAIEFK                      |
| 1252.6605 | 1252.6497 | -0.0108 | -9 | 127 | 137 | MKEIAEAYLQK                     |
| 1253.616  | 1253.6311 | 0.0151  | 12 | 302 | 311 | FELNADLFR                       |
| 1391.7252 | 1391.7244 | -0.0008 | -1 | 237 | 247 | MVNHFAIEFKR                     |
| 1480.7543 | 1480.7609 | 0.0066  | 4  | 300 | 311 | ARFEELNADLFR                    |
| 1480.7543 | 1480.7609 | 0.0066  | 4  | 300 | 311 | ARFEELNADLFR                    |
| 1653.8318 | 1653.8531 | 0.0213  | 13 | 89  | 102 | HWPFMVDAGRPK                    |
| 1838.0129 | 1838.0012 | -0.0117 | -6 | 326 | 342 | LDKSQIHDLVGGSTR                 |
| 1981.9977 | 1981.9973 | -0.0004 | 0  | 138 | 155 | TVTNAVTVPAYFNDSQ<br>R           |
| 1981.9977 | 1981.9973 | -0.0004 | 0  | 138 | 155 | TVTNAVTVPAYFNDSQ<br>R           |
| 2774.3267 | 2774.3303 | 0.0036  | 1  | 424 | 447 | QTQTFITYSDNQPGVLQ<br>VVEGER     |
| 2997.4575 | 2997.4656 | 0.0081  | 3  | 273 | 299 | TLSSSTOASIEIDSLYEGI<br>DFYTSITR |

|              |            |   |                    |               |                |                    |
|--------------|------------|---|--------------------|---------------|----------------|--------------------|
| Spot Idx/Pos | 140/F8     | 8 | Instr./Spot Origin | ab4700/042810 | Process Status | Analysis Succeeded |
| Plate #/Name | [1] 042810 |   | 4700 Sample Name   |               | Spectra        | 13                 |

| Rank | Protein Name | Accession No. | Protein MW | Protein Score | Protein C. I. % | Total Ion Score | Total Ion C. I. % |
|------|--------------|---------------|------------|---------------|-----------------|-----------------|-------------------|
|------|--------------|---------------|------------|---------------|-----------------|-----------------|-------------------|

|   |                                   |          |       |    |        |  |  |
|---|-----------------------------------|----------|-------|----|--------|--|--|
| 2 | dead box X isoform [Homo sapiens] | gi 25805 | 73226 | 44 | 74.005 |  |  |
|---|-----------------------------------|----------|-------|----|--------|--|--|

| Peptide Information |             |            |            |              |           |         |              |
|---------------------|-------------|------------|------------|--------------|-----------|---------|--------------|
| Calc. Mass          | Obsrv. Mass | ± da ± ppm | Start Seq. | End Sequence | Ion Score | C. I. % | Modification |

|           |           |         |     |     |     |                           |  |
|-----------|-----------|---------|-----|-----|-----|---------------------------|--|
| 895.5148  | 895.5149  | 0.0001  | 0   | 38  | 44  | YIPHLR                    |  |
| 1182.5497 | 1182.5872 | 0.0375  | 32  | 100 | 110 | GRSDYDYGISR               |  |
| 1182.5497 | 1182.5872 | 0.0375  | 32  | 100 | 110 | GRSDYDYGISR               |  |
| 1300.6392 | 1300.6202 | -0.019  | -15 | 479 | 488 | DREELAHQFR                |  |
| 1300.6392 | 1300.6202 | -0.019  | -15 | 479 | 488 | DREELAHQFR                |  |
| 1320.6793 | 1320.6575 | -0.0218 | -17 | 277 | 287 | ELAVQIYEER                |  |
| 1320.6793 | 1320.6575 | -0.0218 | -17 | 277 | 287 | ELAVQIYEER                |  |
| 1336.6388 | 1336.625  | -0.0138 | -10 | 352 | 362 | MLDMGFEPQIR               |  |
| 1336.6388 | 1336.625  | -0.0138 | -10 | 352 | 362 | MLDMGFEPQIR               |  |
| 1485.8787 | 1485.8275 | -0.0512 | -34 | 264 | 276 | KQYPSLVLAPTR              |  |
| 1502.7894 | 1502.7466 | -0.0372 | -25 | 82  | 96  | SSFFDQKGGSRGR             |  |
| 1524.7804 | 1524.756  | -0.0244 | -16 | 535 | 548 | VGNLGLATFFNER             |  |
| 1524.7804 | 1524.756  | -0.0244 | -16 | 535 | 548 | VGNLGLATFFNER             |  |
| 1557.7947 | 1557.7716 | -0.0231 | -15 | 395 | 407 | DFLDEYFLAVGR              |  |
| 1557.7947 | 1557.7716 | -0.0231 | -15 | 395 | 407 | DFLDEYFLAVGR              |  |
| 2083.0242 | 2082.9902 | -0.034  | -16 | 512 | 528 | HVNFDPDSIEEYVHR           |  |
| 2332.2546 | 2332.1785 | -0.0761 | -33 | 231 | 252 | TAARLLPILSQISDGPGE<br>ALR |  |

|   |                                                                            |             |  |         |    |   |  |
|---|----------------------------------------------------------------------------|-------------|--|---------|----|---|--|
| 8 | heterogeneous nuclear ribonucleoprotein M isoform a variant [Homo sapiens] | gi 62089046 |  | 65211.2 | 21 | 0 |  |
|---|----------------------------------------------------------------------------|-------------|--|---------|----|---|--|

| Peptide Information |             |            |            |              |           |         |              |
|---------------------|-------------|------------|------------|--------------|-----------|---------|--------------|
| Calc. Mass          | Obsrv. Mass | ± da ± ppm | Start Seq. | End Sequence | Ion Score | C. I. % | Modification |

|           |           |         |    |     |     |                             |  |
|-----------|-----------|---------|----|-----|-----|-----------------------------|--|
| 1427.7133 | 1427.7237 | 0.0164  | 11 | 477 | 491 | MGPAMGPPALGACIER            |  |
| 1613.7773 | 1613.7665 | -0.0108 | -7 | 342 | 356 | MGLRLDLMASSIER              |  |
| 2034.9528 | 2034.9397 | -0.0131 | -6 | 513 | 535 | GNFGGSFAGSFGGAGG<br>HAPGVAR |  |
| 2034.9528 | 2034.9397 | -0.0131 | -6 | 513 | 535 | GNFGGSFAGSFGGAGG<br>HAPGVAR |  |
| 2211.05   | 2211.05   | 0       | 0  | 322 | 341 | MGLVMDRMGVSVERMGS<br>GIER   |  |
| 2283.0896 | 2283.1208 | 0.0312  | 14 | 558 | 577 | FNECGHLYADIKMENG<br>KSK     |  |
| 2286.115  | 2286.1216 | 0.0066  | 3  | 469 | 491 | MGANSLERMGPAMGPA<br>LGAGIER |  |

|   |                           |            |  |          |    |        |  |
|---|---------------------------|------------|--|----------|----|--------|--|
| 9 | golgin-245 [Homo sapiens] | gi 1173565 |  | 244378.2 | 48 | 88.388 |  |
|---|---------------------------|------------|--|----------|----|--------|--|

| Peptide Information |             |            |            |              |           |         |              |
|---------------------|-------------|------------|------------|--------------|-----------|---------|--------------|
| Calc. Mass          | Obsrv. Mass | ± da ± ppm | Start Seq. | End Sequence | Ion Score | C. I. % | Modification |

|           |           |         |     |      |      |                         |  |
|-----------|-----------|---------|-----|------|------|-------------------------|--|
| 895.5359  | 895.5149  | -0.021  | -23 | 336  | 342  | LOKLHEK                 |  |
| 1104.5782 | 1104.569  | -0.0092 | -8  | 1166 | 1175 | ADIESLVTEK              |  |
| 1104.5782 | 1104.569  | -0.0092 | -8  | 1166 | 1175 | ADIESLVTEK              |  |
| 1182.6224 | 1182.5872 | -0.0352 | -30 | 2    | 11   | ERSLSSYRGK              |  |
| 1182.6224 | 1182.5872 | -0.0352 | -30 | 2    | 11   | ERSLSSYRGK              |  |
| 1233.6508 | 1233.6006 | -0.0502 | -41 | 1508 | 1517 | KOLLSQMEEK              |  |
| 1233.6508 | 1233.6006 | -0.0502 | -41 | 1508 | 1517 | KOLLSQMEEK              |  |
| 1438.7375 | 1438.7392 | 0.0017  | 29  | 373  | 384  | SQSEYLIKQSEK            |  |
| 1438.7375 | 1438.7392 | 0.0017  | 29  | 373  | 384  | SQSEYLIKQSEK            |  |
| 1502.806  | 1502.7466 | -0.0594 | -40 | 838  | 850  | KELENTALELSQK           |  |
| 1524.7903 | 1524.756  | -0.0343 | -22 | 1050 | 1062 | SNKSLDKSLEFK            |  |
| 1524.7903 | 1524.756  | -0.0343 | -22 | 1050 | 1062 | SNKSLDKSLEFK            |  |
| 1592.8577 | 1592.905  | 0.0473  | 30  | 456  | 468  | HNKEITVMVEKHK           |  |
| 1635.8588 | 1635.8716 | 0.0128  | 8   | 266  | 280  | AARFEELKALSTACK         |  |
| 1778.9143 | 1778.8341 | -0.0802 | -45 | 410  | 423  | LRLDQQAETRYRTR          |  |
| 1833.9812 | 1833.9382 | -0.043  | -23 | 1063 | 1078 | KLSEELAIQLDCKCK         |  |
| 1910.9528 | 1910.9139 | -0.0389 | -20 | 1509 | 1523 | QLLSQMEKEEQYKK          |  |
| 1930.0062 | 1929.9452 | -0.061  | -32 | 44   | 59   | IAELREELQMDQQAQK        |  |
| 1951.0494 | 1950.9677 | -0.0817 | -42 | 1588 | 1603 | TYEEKISVLRNLRTEK        |  |
| 1971.0028 | 1970.9785 | -0.0243 | -12 | 172  | 187  | EALQQLDERLQLELEK        |  |
| 1982.9487 | 1982.9682 | 0.0175  | 9   | 1913 | 1928 | RYEELDAREEEMTAK         |  |
| 2078.0083 | 2077.9739 | -0.0344 | -17 | 580  | 596  | MDEQKNHQQQVDSIIK        |  |
| 2082.0171 | 2082.0344 | 0.0173  | 8   | 1914 | 1930 | YEEILDAREEEMTAKVR       |  |
| 2084.0518 | 2083.9934 | -0.0584 | -28 | 1981 | 1996 | EOEFREQIHNLEDRLK        |  |
| 2233.1445 | 2233.0481 | -0.0964 | -43 | 534  | 553  | LDVNOTELESLSSELSV<br>LK |  |
| 2256.1177 | 2256.0205 | -0.0972 | -43 | 728  | 746  | QNSEMEQVKSLTQVYE<br>SK  |  |

|              |            |   |                    |               |                |                    |
|--------------|------------|---|--------------------|---------------|----------------|--------------------|
| Spot Idx/Pos | 141/F10    | 9 | Instr./Spot Origin | ab4700/042810 | Process Status | Analysis Succeeded |
| Plate #/Name | [1] 042810 |   | 4700 Sample Name   |               | Spectra        | 13                 |

| Rank | Protein Name | Accession No. | Protein MW | Protein Score | Protein C. I. % | Total Ion Score | Total Ion C. I. % |
|------|--------------|---------------|------------|---------------|-----------------|-----------------|-------------------|
|------|--------------|---------------|------------|---------------|-----------------|-----------------|-------------------|

|   |                        |            |         |    |        |  |  |
|---|------------------------|------------|---------|----|--------|--|--|
| 1 | PRO2446 [Homo sapiens] | gi 7959903 | 27175.8 | 77 | 99.988 |  |  |
|---|------------------------|------------|---------|----|--------|--|--|

| Peptide Information |             |            |            |              |           |         |              |
|---------------------|-------------|------------|------------|--------------|-----------|---------|--------------|
| Calc. Mass          | Obsrv. Mass | ± da ± ppm | Start Seq. | End Sequence | Ion Score | C. I. % | Modification |

|           |           |         |    |     |     |                                 |  |
|-----------|-----------|---------|----|-----|-----|---------------------------------|--|
| 1343.7065 | 1343.7135 | 0.007   | 5  | 183 | 193 | DNTINLIHTFR                     |  |
| 1354.726  | 1354.7419 | 0.0159  | 12 | 52  | 63  | DSIVHQAGMLKR                    |  |
| 1450.7549 | 1450.7675 | 0.0126  | 9  | 136 | 148 | ASHTAPQVLFHSR                   |  |
| 1450.7549 | 1450.7675 | 0.0126  | 9  | 136 | 148 | ASHTAPQVLFHSR                   |  |
| 1606.8561 | 1606.8541 | -0.002  | -1 | 135 | 148 | RASHTAPQVLFHSR                  |  |
| 1760.7874 | 1760.7946 | 0.0072  | 4  | 73  | 86  | YFQFQEEGEGENR                   |  |
| 1760.7874 | 1760.7946 | 0.0072  | 4  | 73  | 86  | YFQFQEEGEGENR                   |  |
| 1918.0181 | 1918.0171 | -0.001  | -1 | 8   | 23  | FYKELQAHGADLELKR                |  |
| 1955.9167 | 1955.9307 | 0.014   | 7  | 87  | 102 | AVIHYRDEETMYVESK                |  |
| 2083.0957 | 2083.0916 | -0.0041 | -2 | 106 | 124 | VTVVFSTVFKDDDDVVIG<br>K         |  |
| 2257.2087 | 2257.2166 | 0.0079  | 3  | 136 | 155 | ASHTAPQVLFHSRPPLE<br>LK         |  |
| 2257.2087 | 2257.2166 | 0.0079  | 3  | 136 | 155 | ASHTAPQVLFHSRPPLE<br>LK         |  |
| 2413.241  | 2413.2661 | 0.0251  | 10 | 183 | 201 | DNTINLIHTFRDYLHYHIK             |  |
| 2992.5376 | 2992.5549 | 0.0173  | 6  | 106 | 131 | VTVVFSTVFKDDDDVVIG<br>KVFMEFK   |  |
| 3088.5513 | 3088.5608 | 0.0095  | 3  | 24  | 51  | VYGSFLNPPESGYIVSLL<br>YDLENLPAK |  |

2 Chain A, Three-Dimensional Structure Of Human Electron Transfer Flavoprotein To 2.1 A Resolution gi|2781202 33075.4 77 99.987 13 85.488

Peptide Information

| Calc. Mass | Obsrv. Mass | ± da ± ppm | Start Seq. | End Sequence Seq. | Ion Score | C. I. %   | Modification          |
|------------|-------------|------------|------------|-------------------|-----------|-----------|-----------------------|
| 1714.8005  | 1714.8143   | 0.0138     | 8          | 84                | 99        | FN        | YTHICAGASAFGK         |
| 1736.0204  | 1736.0052   | -0.0152    | -9         | 68                | 83        | GLL       | PEELTPILATQK          |
| 1751.0676  | 1751.066    | -0.0016    | -1         | 105               | 121       | VAAK      | LEVAPISDIIAIK         |
| 1812.9602  | 1812.9628   | 0.0026     | 1          | 215               | 231       | LLYDLADQL | HAAVGASR              |
| 1812.9602  | 1812.9628   | 0.0026     | 1          | 215               | 231       | LLYDLADQL | HAAVGASR              |
| 1904.917   | 1904.9191   | 0.0021     | 1          | 232               | 250       | AAVDAGFV  | PNDMQVGQT GK          |
| 2351.3154  | 2351.3098   | -0.0056    | -2         | 251               | 273       | IVAPELYI  | AVGIGSIAIQHLA GMK     |
| 2475.2625  | 2475.2732   | 0.0107     | 4          | 209               | 231       | SGENFKL   | LYDLADQLHAA VGASR     |
| 2475.2625  | 2475.2732   | 0.0107     | 4          | 209               | 231       | SGENFKL   | LYDLADQLHAA VGASR     |
| 2553.4648  | 2553.4614   | -0.0034    | -1         | 105               | 128       | VAAK      | LEVAPISDIIAIKSPD TFVR |
| 2553.4648  | 2553.4614   | -0.0034    | -1         | 105               | 128       | VAAK      | LEVAPISDIIAIKSPD TFVR |
| 2821.5054  | 2821.5051   | -0.0003    | 0          | 2                 | 28        | QSTLVIA   | EHANDSLAPITL NTITAA   |
| 2821.5054  | 2821.5051   | -0.0003    | 0          | 2                 | 28        | QSTLVIA   | EHANDSLAPITL NTITAA   |
| 2888.6494  | 2888.6521   | 0.0027     | 1          | 58                | 83        | VLVAGHD   | VYKGLPEELT PLILATQK   |
| 2947.5813  | 2947.5933   | 0.012      | 4          | 277               | 303       | TIVANKD   | PEAIFQVADY GIVADLFK   |

3 actin related protein 2/3 complex subunit 2 [Homo sapiens] gi|5031599 34311.5 74 99.975

Peptide Information

| Calc. Mass | Obsrv. Mass | ± da ± ppm | Start Seq. | End Sequence Seq. | Ion Score | C. I. % | Modification             |
|------------|-------------|------------|------------|-------------------|-----------|---------|--------------------------|
| 1101.6084  | 1101.6196   | 0.0112     | 10         | 1                 | 9         | MILLEVN | NR                       |
| 1101.6084  | 1101.6196   | 0.0112     | 10         | 1                 | 9         | MILLEVN | NR                       |
| 1343.7065  | 1343.7135   | 0.007      | 5          | 238               | 248       | DNTINL  | HTFR                     |
| 1354.726   | 1354.7419   | 0.0159     | 12         | 107               | 118       | DSIV    | HQAGMLKR                 |
| 1450.7549  | 1450.7675   | 0.0126     | 9          | 191               | 203       | ASHTAP  | QVLFVSHR                 |
| 1450.7549  | 1450.7675   | 0.0126     | 9          | 191               | 203       | ASHTAP  | QVLFVSHR                 |
| 1606.8561  | 1606.8541   | -0.002     | -1         | 190               | 203       | RASHTA  | PQVLFVSHR                |
| 1760.7874  | 1760.7946   | 0.0072     | 4          | 128               | 141       | YFQFOE  | GEGEGENR                 |
| 1760.7874  | 1760.7946   | 0.0072     | 4          | 128               | 141       | YFQFOE  | GEGEGENR                 |
| 1918.0181  | 1918.0171   | -0.001     | -1         | 63                | 78        | FYKELQ  | AHGADELLKR               |
| 1955.9167  | 1955.9307   | 0.014      | 7          | 142               | 157       | AVIHYR  | DEDTMIVESK               |
| 2083.0957  | 2083.0916   | -0.0041    | -2         | 161               | 179       | VTVV    | FVSTVKDDDDVVIG K         |
| 2257.2087  | 2257.2166   | 0.0079     | 3          | 191               | 210       | ASHTAP  | QVLFVSHREPPLE LK         |
| 2257.2087  | 2257.2166   | 0.0079     | 3          | 191               | 210       | ASHTAP  | QVLFVSHREPPLE LK         |
| 2413.241   | 2413.2661   | 0.0251     | 10         | 238               | 256       | DNTINL  | HTFRDYLHYHIK             |
| 2992.5376  | 2992.5549   | 0.0173     | 6          | 161               | 186       | VTVV    | FVSTVKDDDDVVIG K         |
| 3088.5513  | 3088.5608   | 0.0095     | 3          | 79                | 106       | VYGS    | FLNPFESGYNVSL YDLENLPASK |

| Spot Idx/Pos | 142/F12      | 10            | Instr./Spot Origin | ab4700/042810 | Process Status  | Analysis Succeeded |                   |
|--------------|--------------|---------------|--------------------|---------------|-----------------|--------------------|-------------------|
| Plate #/Name | [1] 042810   |               | 4700 Sample Name   |               | Spectra         | 13                 |                   |
| Rank         | Protein Name | Accession No. | Protein MW         | Protein Score | Protein C. I. % | Total Ion Score    | Total Ion C. I. % |

1 actin related protein 2/3 complex subunit 2 [Homo sapiens] gi|5031599 34311.5 113 100 10 72.814

Peptide Information

| Calc. Mass | Obsrv. Mass | ± da ± ppm | Start Seq. | End Sequence Seq. | Ion Score | C. I. % | Modification             |
|------------|-------------|------------|------------|-------------------|-----------|---------|--------------------------|
| 1101.6084  | 1101.605    | -0.0034    | -3         | 1                 | 9         | MILLEVN | NR                       |
| 1101.6084  | 1101.605    | -0.0034    | -3         | 1                 | 9         | MILLEVN | NR                       |
| 1270.6248  | 1270.6273   | 0.0025     | 2          | 180               | 189       | VFMQ    | EKQGR                    |
| 1314.7489  | 1314.7307   | -0.0182    | -14        | 55                | 65        | VMSISL  | KFYK                     |
| 1343.7065  | 1343.7064   | -0.0001    | 0          | 238               | 248       | DNTINL  | HTFR                     |
| 1354.726   | 1354.7288   | 0.0028     | 2          | 107               | 118       | DSIV    | HQAGMLKR                 |
| 1450.7549  | 1450.7538   | -0.0011    | -1         | 191               | 203       | ASHTAP  | QVLFVSHR                 |
| 1450.7549  | 1450.7538   | -0.0011    | -1         | 191               | 203       | ASHTAP  | QVLFVSHR                 |
| 1479.7914  | 1479.8063   | 0.0149     | 10         | 66                | 78        | ELQAH   | GADELLKR                 |
| 1606.8561  | 1606.8483   | -0.0078    | -5         | 190               | 203       | RASHTA  | PQVLFVSHR                |
| 1760.7874  | 1760.7944   | 0.007      | 4          | 128               | 141       | YFQFOE  | GEGEGENR                 |
| 1760.7874  | 1760.7944   | 0.007      | 4          | 128               | 141       | YFQFOE  | GEGEGENR                 |
| 1918.0181  | 1918.0205   | 0.0024     | 1          | 63                | 78        | FYKELQ  | AHGADELLKR               |
| 1955.9167  | 1955.9294   | 0.0127     | 6          | 142               | 157       | AVIHYR  | DEDTMIVESK               |
| 1955.9167  | 1955.9294   | 0.0127     | 6          | 142               | 157       | AVIHYR  | DEDTMIVESK               |
| 2083.0957  | 2083.0823   | -0.0134    | -6         | 161               | 179       | VTVV    | FVSTVKDDDDVVIG K         |
| 2257.2087  | 2257.2156   | 0.0069     | 3          | 191               | 210       | ASHTAP  | QVLFVSHREPPLE LK         |
| 2257.2087  | 2257.2156   | 0.0069     | 3          | 191               | 210       | ASHTAP  | QVLFVSHREPPLE LK         |
| 2413.241   | 2413.2507   | 0.0097     | 4          | 238               | 256       | DNTINL  | HTFRDYLHYHIK             |
| 2990.5508  | 2990.5901   | 0.0393     | 13         | 204               | 230       | EPPEL   | KDTPAAVGDNIG YTFVLFPR    |
| 3088.5513  | 3088.5667   | 0.0154     | 5          | 79                | 106       | VYGS    | FLNPFESGYNVSL YDLENLPASK |

3 Chain A, Three-Dimensional Structure Of Human Electron Transfer Flavoprotein To 2.1 A Resolution gi|2781202 33075.4 92 100 2 0

Peptide Information

| Calc. Mass | Obsrv. Mass | ± da ± ppm | Start Seq. | End Sequence Seq. | Ion Score | C. I. %   | Modification      |
|------------|-------------|------------|------------|-------------------|-----------|-----------|-------------------|
| 1171.647   | 1171.6427   | -0.0043    | -4         | 58                | 67        | VLVAGHD   | VYK               |
| 1714.8005  | 1714.8076   | 0.0071     | 4          | 84                | 99        | QFN       | YTHICAGASAFGK     |
| 1736.0204  | 1736.0026   | -0.0178    | -10        | 68                | 83        | GLL       | PEELTPILATQK      |
| 1751.0676  | 1751.057    | -0.0106    | -6         | 105               | 121       | VAAK      | LEVAPISDIIAIK     |
| 1776.865   | 1776.8628   | -0.0022    | -1         | 170               | 185       | ASSTSP    | VEISEWLDQK        |
| 1776.865   | 1776.8628   | -0.0022    | -1         | 170               | 185       | ASSTSP    | VEISEWLDQK        |
| 1812.9602  | 1812.9636   | 0.0034     | 2          | 215               | 231       | LLYDLADQL | HAAVGASR          |
| 1812.9602  | 1812.9636   | 0.0034     | 2          | 215               | 231       | LLYDLADQL | HAAVGASR          |
| 1904.917   | 1904.9043   | -0.0127    | -7         | 232               | 250       | AAVDAGFV  | PNDMQVGQT GK      |
| 1904.917   | 1904.9043   | -0.0127    | -7         | 232               | 250       | AAVDAGFV  | PNDMQVGQT GK      |
| 2119.0918  | 2119.093    | 0.0012     | 1          | 170               | 188       | ASSTSP    | VEISEWLDQKLT K    |
| 2351.3154  | 2351.2976   | -0.0178    | -8         | 251               | 273       | IVAPELYI  | AVGIGSIAIQHLA GMK |
| 2475.2625  | 2475.272    | 0.0095     | 4          | 209               | 231       | SGENFKL   | LYDLADQLHAA VGASR |
| 2553.4648  | 2553.4648   | 0          | 0          | 105               | 128       | VAAK      | LEVAPISDIIAIKSPD  |

|           |           |         |    |     |                         |
|-----------|-----------|---------|----|-----|-------------------------|
| 2553.4648 | 2553.4648 | 0       | 0  | 105 | TFVR                    |
| 2821.5054 | 2821.5046 | -0.0008 | 0  | 2   | 28 GSTLVIAEHANDSLAPITL  |
| 2821.5054 | 2821.5046 | -0.0008 | 0  | 2   | NTTAAATR                |
| 2888.6494 | 2888.6392 | -0.0102 | -4 | 58  | 83 VLVAQHDVYKGLLPEELT   |
| 2947.5813 | 2947.5796 | -0.0017 | -1 | 277 | 303 TIVAINKDPEAPIFQVADY |
|           |           |         |    |     | GNVADLFK                |

|                     |                                                      |               |                    |               |                 |                    |                   |
|---------------------|------------------------------------------------------|---------------|--------------------|---------------|-----------------|--------------------|-------------------|
| Spot Idx/Pos        | 143/F14                                              | 11            | Instr./Spot Origin | ab4700/042810 | Process Status  | Analysis Succeeded |                   |
| Plate #/Name        | [1] 042810                                           |               | 4700 Sample Name   |               | Spectra         | 3                  |                   |
| Rank                | Protein Name                                         | Accession No. | Protein MW         | Protein Score | Protein C. I. % | Total Ion Score    | Total Ion C. I. % |
| 17                  | Single-stranded DNA binding protein 1 [Homo sapiens] | gi 62205329   | 17348.1            | 15            | 0               |                    |                   |
| Peptide Information |                                                      |               |                    |               |                 |                    |                   |
| Calc. Mass          | Obsrv. Mass                                          | ± da ± ppm    | Start Seq.         | End Sequence  | Ion Score       | C. I. %            | Modification      |
| 883.4995            | 883.4933                                             | -0.0065       | -7                 | 39            | 46 VGGDPVLR     |                    |                   |
| 1044.6312           | 1044.6343                                            | 0.0031        | 3                  | 87            | 95 ISVFRPGLR    |                    |                   |

|                     |                                                                  |               |                    |               |                        |                    |                   |
|---------------------|------------------------------------------------------------------|---------------|--------------------|---------------|------------------------|--------------------|-------------------|
| Spot Idx/Pos        | 144/F16                                                          | 12            | Instr./Spot Origin | ab4700/042810 | Process Status         | Analysis Succeeded |                   |
| Plate #/Name        | [1] 042810                                                       |               | 4700 Sample Name   |               | Spectra                | 13                 |                   |
| Rank                | Protein Name                                                     | Accession No. | Protein MW         | Protein Score | Protein C. I. %        | Total Ion Score    | Total Ion C. I. % |
| 1                   | Chain A, Human Mitochondrial Single-Stranded Dna Binding Protein | gi 2624694    | 15185.8            | 99            | 100                    |                    |                   |
| Peptide Information |                                                                  |               |                    |               |                        |                    |                   |
| Calc. Mass          | Obsrv. Mass                                                      | ± da ± ppm    | Start Seq.         | End Sequence  | Ion Score              | C. I. %            | Modification      |
| 883.4995            | 883.4959                                                         | -0.0036       | -4                 | 23            | 30 VGGDPVLR            |                    |                   |
| 1044.6312           | 1044.6274                                                        | -0.0038       | -4                 | 71            | 79 ISVFRPGLR           |                    |                   |
| 1164.6959           | 1164.6891                                                        | -0.0068       | -6                 | 13            | 22 SLNRVHLLGR          |                    |                   |
| 1616.7373           | 1616.7599                                                        | 0.0226        | 14                 | 98            | 110 IDVGEFMKNNWR       |                    |                   |
| 1778.8894           | 1778.9095                                                        | 0.0201        | 11                 | 36            | 50 NPVTFSLATNEMWR      |                    |                   |
| 1992.0647           | 1992.066                                                         | 0.0013        | 1                  | 112           | 129 QATTIADNIIFLSDQTK  |                    |                   |
| 2148.1658           | 2148.1343                                                        | -0.0315       | -15                | 111           | 129 RQATTIADNIIFLSDQTK |                    |                   |
| 2293.0842           | 2293.0598                                                        | -0.0244       | -11                | 51            | 70 SGESEVYQLGDVSKTT    |                    |                   |
|                     |                                                                  |               |                    |               | WHR                    |                    |                   |
| 2320.1753           | 2320.1577                                                        | -0.0176       | -8                 | 31            | 50 QVEGKNPVTFISLATNEM  |                    |                   |
|                     |                                                                  |               |                    |               | WR                     |                    |                   |
| 2378.2449           | 2378.2454                                                        | 0.0005        | 0                  | 112           | 132 QATTIADNIIFLSDQTK  |                    |                   |
|                     |                                                                  |               |                    |               | E                      |                    |                   |

|                     |                     |               |            |               |                       |                 |                   |
|---------------------|---------------------|---------------|------------|---------------|-----------------------|-----------------|-------------------|
| Rank                | Protein Name        | Accession No. | Protein MW | Protein Score | Protein C. I. %       | Total Ion Score | Total Ion C. I. % |
| 4                   | EP2E [Homo sapiens] | gi 10799277   | 9085.3     | 29            | 0                     |                 |                   |
| Peptide Information |                     |               |            |               |                       |                 |                   |
| Calc. Mass          | Obsrv. Mass         | ± da ± ppm    | Start Seq. | End Sequence  | Ion Score             | C. I. %         | Modification      |
| 1422.6763           | 1422.6794           | 0.0031        | 2          | 27            | 38 NTICRMQGGICR       |                 |                   |
| 1422.6763           | 1422.6794           | 0.0031        | 2          | 27            | 38 NTICRMQGGICR       |                 |                   |
| 2384.0161           | 2384.0339           | 0.0178        | 7          | 59            | 80 CCVNTDEEGKEKPEMD   |                 |                   |
|                     |                     |               |            |               | GRSGI                 |                 |                   |
| 3354.7852           | 3354.7366           | -0.0486       | -14        | 2             | 31 KVFFLFAVLFCLVQTNSG |                 |                   |
|                     |                     |               |            |               | DVPPGIRNTICR          |                 |                   |

|              |                                                                |               |                    |               |                 |                    |                   |
|--------------|----------------------------------------------------------------|---------------|--------------------|---------------|-----------------|--------------------|-------------------|
| Spot Idx/Pos | 195/H18                                                        | 13            | Instr./Spot Origin | ab4700/042810 | Process Status  | Analysis Succeeded |                   |
| Plate #/Name | [1] 042810                                                     |               | 4700 Sample Name   |               | Spectra         | 13                 |                   |
| Rank         | Protein Name                                                   | Accession No. | Protein MW         | Protein Score | Protein C. I. % | Total Ion Score    | Total Ion C. I. % |
| 1            | PREDICTED: similar to 60S ribosomal protein L35 [Homo sapiens] | gi 51459132   | 14555.4            | 48            | 88.388          |                    |                   |

|                     |             |            |            |              |                |         |              |
|---------------------|-------------|------------|------------|--------------|----------------|---------|--------------|
| Peptide Information |             |            |            |              |                |         |              |
| Calc. Mass          | Obsrv. Mass | ± da ± ppm | Start Seq. | End Sequence | Ion Score      | C. I. % | Modification |
| 817.5076            | 817.5087    | 0.0011     | 1          | 1            | 7 MAKIKAR      |         |              |
| 823.5009            | 823.4944    | -0.0065    | -8         | 93           | 98 HRLNKR      |         |              |
| 825.4941            | 825.4947    | 0.0006     | 1          | 8            | 14 DLHGKKK     |         |              |
| 902.524             | 902.5374    | 0.0134     | 15         | 111          | 117 ERLLCLR    |         |              |
| 924.5373            | 924.5402    | 0.0029     | 3          | 6            | 13 ARDLHGK     |         |              |
| 946.5468            | 946.5562    | 0.0094     | 10         | 104          | 110 TKQDQWK    |         |              |
| 988.5785            | 988.5778    | -0.0007    | -1         | 33           | 43 VAKVTGGAASK |         |              |
| 995.5857            | 995.5863    | 0.0006     | 1          | 90           | 97 ATRHRLNK    |         |              |
| 1012.5785           | 1012.5893   | 0.0108     | 11         | 99           | 106 EEHLKTKK   |         |              |
| 1018.5891           | 1018.5967   | 0.0076     | 7          | 36           | 46 VTGGAASKLSK |         |              |
| 1030.6189           | 1030.6138   | -0.0051    | -5         | 111          | 118 ERLLCLRK   |         |              |
| 1037.6213           | 1037.6206   | -0.0007    | -1         | 4            | 12 IKARDLHGK   |         |              |

|                     |                               |               |            |               |                      |                 |                   |
|---------------------|-------------------------------|---------------|------------|---------------|----------------------|-----------------|-------------------|
| Rank                | Protein Name                  | Accession No. | Protein MW | Protein Score | Protein C. I. %      | Total Ion Score | Total Ion C. I. % |
| 2                   | RPL13A protein [Homo sapiens] | gi 111494155  | 16706.4    | 39            | 19.667               |                 |                   |
| Peptide Information |                               |               |            |               |                      |                 |                   |
| Calc. Mass          | Obsrv. Mass                   | ± da ± ppm    | Start Seq. | End Sequence  | Ion Score            | C. I. %         | Modification      |
| 828.5011            | 828.4939                      | -0.0072       | -9         | 57            | 64 MIVPAALK          |                 |                   |
| 844.5151            | 844.514                       | -0.0011       | -1         | 105           | 110 IHYRKK           |                 |                   |
| 872.5312            | 872.5234                      | -0.0078       | -9         | 116           | 122 LRKQAEK          |                 |                   |
| 915.5522            | 915.5591                      | 0.0069        | 8          | 103           | 109 AKIHYRKK         |                 |                   |
| 915.5522            | 915.5591                      | 0.0069        | 8          | 103           | 109 AKIHYRKK         |                 |                   |
| 971.5632            | 971.5668                      | 0.0036        | 4          | 34            | 42 GQAALDRLK         |                 |                   |
| 973.5676            | 973.571                       | 0.0034        | 3          | 123           | 130 NVEKKIDK         |                 |                   |
| 977.5679            | 977.5819                      | 0.014         | 14         | 18            | 24 IFWRTVR           |                 |                   |
| 977.5679            | 977.5819                      | 0.014         | 14         | 18            | 24 IFWRTVR           |                 |                   |
| 1044.5948           | 1044.6017                     | 0.0069        | 7          | 101           | 108 EKAKIHYR         |                 |                   |
| 1108.6248           | 1108.631                      | 0.0062        | 6          | 128           | 136 IDKYTEVLK        |                 |                   |
| 1267.7303           | 1267.7239                     | -0.0065       | -5         | 22            | 32 TVRGLMFKTK        |                 |                   |
| 2866.4885           | 2866.5105                     | 0.022         | 8          | 74            | 98 FAYLGRLAHEVGVKQQA |                 |                   |
|                     |                               |               |            |               | VTATLEDK             |                 |                   |

|                     |                               |               |            |               |                 |                 |                   |
|---------------------|-------------------------------|---------------|------------|---------------|-----------------|-----------------|-------------------|
| Rank                | Protein Name                  | Accession No. | Protein MW | Protein Score | Protein C. I. % | Total Ion Score | Total Ion C. I. % |
| 3                   | CCDC71 protein [Homo sapiens] | gi 48735006   | 24879.5    | 35            | 0               |                 |                   |
| Peptide Information |                               |               |            |               |                 |                 |                   |
| Calc. Mass          | Obsrv. Mass                   | ± da ± ppm    | Start Seq. | End Sequence  | Ion Score       | C. I. %         | Modification      |
| 827.4846            | 827.4941                      | 0.0095        | 11         | 120           | 126 VARTQPR     |                 |                   |
| 845.5025            | 845.5119                      | 0.0094        | 11         | 1             | 7 PKCLTRK       |                 |                   |
| 853.5254            | 853.513                       | -0.0124       | -15        | 163           | 169 DLPPKRR     |                 |                   |
| 895.522             | 895.5322                      | 0.0102        | 11         | 7             | 15 KPGAGPRR     |                 |                   |
| 944.5635            | 944.5654                      | 0.0019        | 2          | 67            | 75 TQAKAAKAR    |                 |                   |
| 945.5662            | 945.564                       | -0.0022       | -2         | 100           | 108 VMAARAKAK   |                 |                   |
| 1013.5962           | 1013.6022                     | 0.006         | 6          | 127           | 136 GRGPRKGSAAK |                 |                   |
| 1026.6166           | 1026.608                      | -0.0086       | -8         | 118           | 126 AKVARTQPR   |                 |                   |
| 1040.6072           | 1040.6086                     | 0.0014        | 1          | 120           | 128 VARTQPRGR   |                 |                   |
| 1041.6276           | 1041.613                      | -0.0146       | -14        | 57            | 86 AARAAKAVAR   |                 |                   |
| 1100.635            | 1100.6407                     | 0.0057        | 5          | 223           | 232 LGLLPLYSAV  |                 |                   |
| 1105.6146           | 1105.6022                     | -0.0124       | -11        | 34            | 44 RMKGGKALGK   |                 |                   |
| 1171.6906           | 1171.678                      | -0.0126       | -11        | 60            | 70 AQAKVARTQAK  |                 |                   |
| 1184.6494           | 1184.6377                     | -0.0117       | -10        | 146           | 155 NRPETVGQKR  |                 |                   |

|                     |                                                            |               |            |               |                 |                 |                   |
|---------------------|------------------------------------------------------------|---------------|------------|---------------|-----------------|-----------------|-------------------|
| Rank                | Protein Name                                               | Accession No. | Protein MW | Protein Score | Protein C. I. % | Total Ion Score | Total Ion C. I. % |
| 6                   | PREDICTED: similar to H3 histone, family 3B [Homo sapiens] | gi 88976633   | 15216.4    | 32            | 0               |                 |                   |
| Peptide Information |                                                            |               |            |               |                 |                 |                   |
| Calc. Mass          | Obsrv. Mass                                                | ± da ± ppm    | Start Seq. | End Sequence  | Ion Score       | C. I. %         | Modification      |
| 832.4999            | 832.4979                                                   | -0.002        | -2         | 4             | 10 TKQTARK      |                 |                   |
| 844.5073            | 844.514                                                    | 0.0067        | 8          | 117           | 123 RVTIMPK     |                 |                   |

|           |           |         |    |     |     |               |  |  |  |  |
|-----------|-----------|---------|----|-----|-----|---------------|--|--|--|--|
| 858.5155  | 858.5172  | 0.0017  | 2  | 20  | 27  | QLATKAAR      |  |  |  |  |
| 931.5432  | 931.5523  | 0.0091  | 10 | 2   | 9   | ARTKQTAR      |  |  |  |  |
| 945.5727  | 945.564   | -0.0087 | -9 | 58  | 85  | STELLVLRK     |  |  |  |  |
| 992.5635  | 992.5674  | -0.0039 | -4 | 51  | 57  | EIRRYQK       |  |  |  |  |
| 1032.5948 | 1032.6097 | 0.0149  | 14 | 42  | 50  | YRPGTVALR     |  |  |  |  |
| 1052.5847 | 1052.5978 | 0.0131  | 12 | 124 | 132 | DIQLAHSIR     |  |  |  |  |
| 1218.6841 | 1218.6906 | 0.0065  | 5  | 71  | 80  | LVREIAQDFK    |  |  |  |  |
| 1229.6959 | 1229.6937 | -0.0022 | -2 | 25  | 37  | AARKSAPSTGGVK |  |  |  |  |

25 PREDICTED: similar to ribosomal protein L13a isoform gi|89037070 23428.2 26 0

1 [Homo sapiens]  
 Peptide Information

| Calc. Mass | Obsrv. Mass | ± da ± ppm | Start Seq. | End Sequence Seq. | Ion Score | C. I. %           | Modification |
|------------|-------------|------------|------------|-------------------|-----------|-------------------|--------------|
| 813.5305   | 813.533     | 0.0025     | 3          | 26                | 32        | QVLLGRK           |              |
| 844.5151   | 844.514     | -0.0011    | -1         | 166               | 171       | IHRFRK            |              |
| 872.5312   | 872.5234    | -0.0078    | -9         | 177               | 183       | LRKQAEK           |              |
| 915.5522   | 915.5591    | 0.0069     | 8          | 164               | 170       | AKIHYRK           |              |
| 915.5522   | 915.5591    | 0.0069     | 8          | 164               | 170       | AKIHYRK           |              |
| 971.5632   | 971.5668    | 0.0036     | 4          | 95                | 103       | GQAALDRLK         |              |
| 973.5676   | 973.571     | 0.0034     | 3          | 184               | 191       | NVEKKIDK          |              |
| 1018.5865  | 1018.5967   | 0.0102     | 10         | 117               | 125       | RMVVPAFAK         |              |
| 1044.5948  | 1044.5917   | -0.0069    | -7         | 162               | 169       | EKAKHYR           |              |
| 1108.6248  | 1108.631    | 0.0062     | 6          | 189               | 197       | IDKYTEVLK         |              |
| 1267.7303  | 1267.7238   | -0.0065    | -5         | 83                | 93        | TVRGMPLPKTK       |              |
| 2000.009   | 2000.002    | -0.007     | -3         | 32                | 49        | KVVVCCGEINISGNFYR |              |

Spot Idx/Pos 146/F20 14 Instr./Spot Origin ab4700/042810 Process Status Analysis Succeeded  
 Plate [#] Name [1] 042810 4700 Sample Name Spectra 13

Rank Protein Name Accession No. Protein MW Protein Score Protein C. I. % Total Ion Score Total Ion C. I. %

11 H1 histone family, member 0 [Homo sapiens] gi|20810 20872.2 21 0

| Calc. Mass | Obsrv. Mass | ± da ± ppm | Start Seq. | End Sequence Seq. | Ion Score | C. I. %    | Modification |
|------------|-------------|------------|------------|-------------------|-----------|------------|--------------|
| 870.577    | 870.5884    | 0.0114     | 13         | 162               | 169       | TVKAKPVK   |              |
| 895.6087   | 895.6135    | 0.0048     | 5          | 175               | 182       | KAAPVPAK   |              |
| 899.6036   | 899.61      | 0.0064     | 7          | 157               | 164       | AKPKTVK    |              |
| 966.6458   | 966.6421    | -0.0037    | -4         | 176               | 184       | AKPVKPAK   |              |
| 986.6356   | 986.6431    | 0.0075     | 8          | 74                | 82        | RLVTTGVLK  |              |
| 996.6564   | 996.6554    | -0.001     | -1         | 137               | 145       | PKPATPVK   |              |
| 1053.6779  | 1053.6901   | 0.0122     | 12         | 165               | 174       | AKPVKASKPK |              |

Spot Idx/Pos 147/F22 15 Instr./Spot Origin ab4700/042810 Process Status Analysis Succeeded  
 Plate [#] Name [1] 042810 4700 Sample Name Spectra 13

Rank Protein Name Accession No. Protein MW Protein Score Protein C. I. % Total Ion Score Total Ion C. I. %

2 ARP3 actin-related protein 3 homolog [Homo sapiens] gi|5031573 47341 38 0 2 0

| Calc. Mass | Obsrv. Mass | ± da ± ppm | Start Seq. | End Sequence Seq. | Ion Score | C. I. %               | Modification |
|------------|-------------|------------|------------|-------------------|-----------|-----------------------|--------------|
| 958.5792   | 958.5829    | 0.0037     | 4          | 341               | 348       | RTVLDARLK             |              |
| 1214.5887  | 1214.5781   | -0.0094    | -8         | 266               | 275       | EFSDIVVER             |              |
| 1409.7787  | 1409.7894   | 0.0107     | 8          | 199               | 209       | DITYFQQLR             |              |
| 1409.7787  | 1409.7894   | 0.0107     | 8          | 199               | 209       | DITYFQQLR             | 2 0          |
| 1499.6947  | 1499.7078   | 0.0131     | 9          | 80                | 91        | HGIVEDWDLMER          |              |
| 1499.6947  | 1499.7078   | 0.0131     | 9          | 80                | 91        | HGIVEDWDLMER          |              |
| 1768.9075  | 1768.9175   | 0.01       | 6          | 210               | 225       | DREVEGIPPEQSLETAK     |              |
| 1768.9254  | 1769.9199   | -0.0055    | -3         | 226               | 240       | AKWEKRYVCPDLK         |              |
| 1795.9799  | 1795.9689   | -0.011     | -5         | 212               | 229       | EVGIPPEQSLETAKAVK     |              |
| 1912.981   | 1912.9827   | 0.0017     | 1          | 318               | 334       | NVLSGGSTMFRDFGRR      |              |
| 2154.2183  | 2154.1975   | -0.0208    | -10        | 192               | 209       | HPIAQRDITYFQQLR       |              |
| 2482.1885  | 2482.1809   | -0.0076    | -3         | 103               | 123       | AEPEDHYFLLTEPLNTP ENR |              |
| 2482.1885  | 2482.1809   | -0.0076    | -3         | 103               | 123       | AEPEDHYFLLTEPLNTP ENR |              |

4 translation initiation factor [Homo sapiens] gi|496902 46803.1 38 0

| Calc. Mass | Obsrv. Mass | ± da ± ppm | Start Seq. | End Sequence Seq. | Ion Score | C. I. %                  | Modification |
|------------|-------------|------------|------------|-------------------|-----------|--------------------------|--------------|
| 1159.647   | 1159.6617   | 0.0147     | 13         | 330               | 339       | VLISTDWAR                |              |
| 1212.6946  | 1212.7087   | 0.0141     | 12         | 106               | 116       | ETGALARTP                |              |
| 1417.7109  | 1417.7208   | 0.0099     | 7          | 196               | 206       | GRKEQIVDVR               |              |
| 1469.7495  | 1469.7535   | 0.004      | 3          | 153               | 166       | LDYQHVAVGTPGR            |              |
| 1588.8805  | 1588.8656   | -0.0149    | -9         | 374               | 387       | KGVAINFVKNDDIR           |              |
| 1827.9387  | 1827.9484   | 0.0097     | 5          | 52                | 67        | GIYAYGFEKPSAIQQR         |              |
| 1827.9387  | 1827.9484   | 0.0097     | 5          | 52                | 67        | GIYAYGFEKPSAIQQR         |              |
| 1994.0392  | 1994.0331   | -0.0281    | -13        | 244               | 260       | DELTLGKQFFVAVER          |              |
| 2140.1396  | 2140.1401   | 0.0005     | 0          | 340               | 358       | GLDVPQVSLIINYDLPNN R     |              |
| 2140.1548  | 2140.1401   | -0.0147    | -7         | 52                | 70        | GIYAYGFEKPSAIQGRAIK      |              |
| 2870.395   | 2870.373    | -0.022     | -8         | 388               | 411       | ILRDIEQYYSQIDEMPM NVADLI |              |

5 Growth-arrest-specific protein 7 (GAS-7) gi|12643625 47236.7 36 0

| Calc. Mass | Obsrv. Mass | ± da ± ppm | Start Seq. | End Sequence Seq. | Ion Score | C. I. %                  | Modification |
|------------|-------------|------------|------------|-------------------|-----------|--------------------------|--------------|
| 873.4901   | 873.4961    | 0.006      | 7          | 278               | 284       | ALTERQR                  |              |
| 1393.7321  | 1393.7365   | 0.0044     | 3          | 179               | 189       | ERKIEEDYAK               |              |
| 1478.8074  | 1478.7898   | -0.0176    | -12        | 264               | 276       | QLASRYASVEKAR            |              |
| 1644.8591  | 1644.8389   | -0.0223    | -14        | 217               | 231       | SLADEAEVHLKFSAK          |              |
| 1707.8507  | 1707.8685   | 0.0178     | 10         | 87                | 103       | KSTGDSQNLGSSSPSKK        |              |
| 1759.937   | 1759.913    | -0.024     | -14        | 283               | 296       | QRDLKMTQQLKLR            |              |
| 1762.9128  | 1762.9265   | 0.0137     | 8          | 254               | 268       | CDHHIADLRKQLASR          |              |
| 1772.954   | 1772.9673   | 0.0133     | 8          | 216               | 231       | KSLADEAEVHLKFSAK         |              |
| 1786.9333  | 1786.9213   | -0.012     | -7         | 146               | 162       | DPQNGNTVAGFELLQK         |              |
| 2460.2363  | 2460.2466   | 0.0103     | 4          | 194               | 216       | LSQNSLASQEEGSLGEA WAQVKK |              |

15 translation elongation factor 1 alpha 1-like 14 [Homo sapiens] gi|15277711 42997.3 28 0

| Calc. Mass | Obsrv. Mass | ± da ± ppm | Start Seq. | End Sequence Seq. | Ion Score | C. I. %                     | Modification |
|------------|-------------|------------|------------|-------------------|-----------|-----------------------------|--------------|
| 1025.6101  | 1025.6256   | 0.0154     | 15         | 192               | 202       | IGGITVPGVR                  |              |
| 1314.7416  | 1314.7347   | -0.0069    | -5         | 71                | 82        | EHALLYTLGVK                 |              |
| 1316.7355  | 1316.7366   | 0.0011     | 1          | 364               | 375       | DMRQTVAVGVK                 |              |
| 1404.7269  | 1404.7406   | 0.0137     | 10         | 21                | 32        | YYVTIDAPGHR                 |              |
| 1776.9313  | 1776.9458   | 0.0145     | 8          | 1                 | 15        | MQSERGITDISLVK              |              |
| 1908.0013  | 1908.0121   | 0.0108     | 6          | 21                | 36        | YYVTIDAPGHRDFK              |              |
| 1908.0013  | 1908.0121   | 0.0108     | 6          | 21                | 36        | YYVTIDAPGHRDFK              |              |
| 2515.3838  | 2515.3674   | -0.0164    | -7         | 203               | 226       | VETGLKPGMVVTFAPV NVTTEVK    |              |
| 2515.3838  | 2515.3674   | -0.0164    | -7         | 203               | 226       | VETGLKPGMVVTFAPV NVTTEVK    |              |
| 2938.3782  | 2938.3569   | -0.0213    | -7         | 332               | 359       | SGDAIVDMVPGKPMCV EFSFDYPLGR |              |
| 2938.3782  | 2938.3569   | -0.0213    | -7         | 332               | 359       | SGDAIVDMVPGKPMCV EFSFDYPLGR |              |

Spot Idx/Pos 148/F24 16 Instr./Spot Origin ab4700/042810 Process Status Analysis Succeeded  
 Plate [#] Name [1] 042810 4700 Sample Name Spectra 13

Rank Protein Name Accession No. Protein MW Protein Score Protein C. I. % Total Ion Score Total Ion C. I. %



|   |                                                     |            |       |    | Score | C. I. % | Score | C. I. % |
|---|-----------------------------------------------------|------------|-------|----|-------|---------|-------|---------|
| 3 | ARP3 actin-related protein 3 homolog [Homo sapiens] | gi 5031573 | 47341 | 37 | 0     | 4       | 0     |         |

| Peptide Information |             |            |            |                   |           |         |              |
|---------------------|-------------|------------|------------|-------------------|-----------|---------|--------------|
| Calc. Mass          | Obsrv. Mass | ± da ± ppm | Start Seq. | End Sequence Seq. | Ion Score | C. I. % | Modification |
| 1214.5687           | 1214.5735   | 0.0048     | 4          | 266               | 275       |         |              |
| 1281.6619           | 1281.6547   | -0.0072    | -6         | 318               | 329       |         |              |
| 1409.7787           | 1409.7798   | 0.0011     | 1          | 199               | 209       |         |              |
| 1409.7787           | 1409.7798   | 0.0011     | 1          | 199               | 209       | 4       | 0            |
| 1499.6947           | 1499.6978   | 0.0031     | 2          | 80                | 91        |         |              |
| 1499.6947           | 1499.6978   | 0.0031     | 2          | 80                | 91        |         |              |
| 1768.9075           | 1768.9159   | 0.0084     | 5          | 210               | 225       |         |              |
| 1795.9799           | 1795.9746   | -0.0053    | -3         | 212               | 228       |         |              |
| 2040.1534           | 2040.1238   | -0.0296    | -15        | 358               | 374       |         |              |
| 2154.2183           | 2154.1868   | -0.0315    | -15        | 192               | 209       |         |              |
| 2482.1885           | 2482.1848   | -0.0037    | -1         | 103               | 123       |         |              |
| 2482.1885           | 2482.1848   | -0.0037    | -1         | 103               | 123       |         |              |
| 2954.469            | 2954.4314   | -0.0376    | -13        | 80                | 102       |         |              |

|   |                                              |           |         |    |   |   |   |
|---|----------------------------------------------|-----------|---------|----|---|---|---|
| 4 | translation initiation factor [Homo sapiens] | gi 496902 | 46803.1 | 36 | 0 | 2 | 0 |
|---|----------------------------------------------|-----------|---------|----|---|---|---|

| Peptide Information |             |            |            |                   |           |         |              |
|---------------------|-------------|------------|------------|-------------------|-----------|---------|--------------|
| Calc. Mass          | Obsrv. Mass | ± da ± ppm | Start Seq. | End Sequence Seq. | Ion Score | C. I. % | Modification |
| 1159.647            | 1159.6421   | -0.0049    | -4         | 330               | 339       |         |              |
| 1262.6772           | 1262.6842   | 0.007      | 6          | 16                | 25        |         |              |
| 1417.7109           | 1417.7123   | 0.0014     | 1          | 196               | 206       |         |              |
| 1469.7495           | 1469.7374   | -0.0121    | -8         | 153               | 166       |         |              |
| 1567.7903           | 1567.7986   | 0.0083     | 5          | 253               | 264       |         |              |
| 1597.8445           | 1597.84     | -0.0045    | -3         | 152               | 166       |         |              |
| 1640.8207           | 1640.8435   | 0.0228     | 14         | 1                 | 16        |         |              |
| 1827.9387           | 1827.9415   | 0.0028     | 2          | 52                | 67        |         |              |
| 1827.9387           | 1827.9415   | 0.0028     | 2          | 52                | 67        |         |              |
| 2140.1396           | 2140.1318   | -0.0078    | -4         | 340               | 358       |         |              |
| 2140.1396           | 2140.1318   | -0.0078    | -4         | 340               | 358       | 3       | 0            |
| 3489.665            | 3489.6687   | 0.0037     | 1          | 17                | 46        |         |              |

|   |                                                                |             |         |    |   |  |  |
|---|----------------------------------------------------------------|-------------|---------|----|---|--|--|
| 6 | translation elongation factor 1 alpha 1-like 14 [Homo sapiens] | gi 15277711 | 42997.3 | 34 | 0 |  |  |
|---|----------------------------------------------------------------|-------------|---------|----|---|--|--|

| Peptide Information |             |            |            |                   |           |         |              |
|---------------------|-------------|------------|------------|-------------------|-----------|---------|--------------|
| Calc. Mass          | Obsrv. Mass | ± da ± ppm | Start Seq. | End Sequence Seq. | Ion Score | C. I. % | Modification |
| 1025.6101           | 1025.6062   | -0.0039    | -4         | 192               | 202       |         |              |
| 1314.7416           | 1314.7267   | -0.0149    | -11        | 71                | 82        |         |              |
| 1314.7416           | 1314.7267   | -0.0149    | -11        | 71                | 82        |         |              |
| 1404.7269           | 1404.729    | 0.0021     | 1          | 21                | 32        |         |              |
| 1776.5913           | 1776.5452   | -0.0319    | 8          | 1                 | 15        |         |              |
| 1808.0013           | 1807.9967   | -0.0046    | -2         | 21                | 36        |         |              |
| 1997.0126           | 1997.0341   | 0.0215     | 11         | 16                | 32        |         |              |
| 2515.3838           | 2515.387    | 0.0032     | 1          | 203               | 226       |         |              |
| 2515.3838           | 2515.387    | 0.0032     | 1          | 203               | 226       |         |              |
| 2852.4167           | 2852.4299   | 0.0132     | 5          | 37                | 65        |         |              |
| 2938.3782           | 2938.3789   | 0.0007     | 0          | 332               | 359       |         |              |
| 2938.3782           | 2938.3789   | 0.0007     | 0          | 332               | 359       |         |              |

|    |                                               |             |         |    |   |  |  |
|----|-----------------------------------------------|-------------|---------|----|---|--|--|
| 11 | phosphogluconate dehydrogenase [Homo sapiens] | gi 40068518 | 53105.9 | 27 | 0 |  |  |
|----|-----------------------------------------------|-------------|---------|----|---|--|--|

| Peptide Information |             |            |            |                   |           |         |              |
|---------------------|-------------|------------|------------|-------------------|-----------|---------|--------------|
| Calc. Mass          | Obsrv. Mass | ± da ± ppm | Start Seq. | End Sequence Seq. | Ion Score | C. I. % | Modification |
| 1411.7766           | 1411.7815   | 0.0049     | 3          | 332               | 343       |         |              |
| 1493.7893           | 1493.7993   | 0.01       | 7          | 435               | 447       |         |              |
| 1591.8074           | 1591.8191   | 0.0117     | 7          | 120               | 136       |         |              |
| 1790.9393           | 1790.9468   | 0.0075     | 4          | 118               | 136       |         |              |
| 2160.1182           | 2160.1196   | 0.0014     | 1          | 88                | 107       |         |              |
| 2310.1399           | 2310.1406   | 0.0007     | 0          | 378               | 396       |         |              |
| 2463.3281           | 2463.311    | -0.0171    | -7         | 266               | 288       |         |              |
| 2551.3191           | 2551.3152   | -0.0039    | -2         | 376               | 396       |         |              |
| 2595.1863           | 2595.2024   | 0.0161     | 6          | 185               | 206       |         |              |

|    |                                                                        |            |       |    |   |  |  |
|----|------------------------------------------------------------------------|------------|-------|----|---|--|--|
| 13 | glucocorticoid receptor AF-1 specific elongation factor [Homo sapiens] | gi 7108915 | 46240 | 27 | 0 |  |  |
|----|------------------------------------------------------------------------|------------|-------|----|---|--|--|

| Peptide Information |             |            |            |                   |           |         |              |
|---------------------|-------------|------------|------------|-------------------|-----------|---------|--------------|
| Calc. Mass          | Obsrv. Mass | ± da ± ppm | Start Seq. | End Sequence Seq. | Ion Score | C. I. % | Modification |
| 1025.6101           | 1025.6062   | -0.0039    | -4         | 220               | 230       |         |              |
| 1314.7416           | 1314.7267   | -0.0149    | -11        | 99                | 110       |         |              |
| 1314.7416           | 1314.7267   | -0.0149    | -11        | 99                | 110       |         |              |
| 1404.7269           | 1404.729    | 0.0021     | 1          | 49                | 60        |         |              |
| 1908.0013           | 1907.9967   | -0.0046    | -2         | 49                | 64        |         |              |
| 1997.0126           | 1997.0341   | 0.0215     | 11         | 44                | 60        |         |              |
| 2515.3838           | 2515.387    | 0.0032     | 1          | 231               | 254       |         |              |
| 2515.3838           | 2515.387    | 0.0032     | 1          | 231               | 254       |         |              |
| 2852.4167           | 2852.4299   | 0.0132     | 5          | 65                | 93        |         |              |
| 2938.3782           | 2938.3789   | 0.0007     | 0          | 360               | 387       |         |              |
| 2938.3782           | 2938.3789   | 0.0007     | 0          | 360               | 387       |         |              |

| Spot Idx/Pos | 161/G2     | 17 | Instr./Spot Origin | ab4700/042810 | Process Status | Analysis Succeeded |
|--------------|------------|----|--------------------|---------------|----------------|--------------------|
| Plate #/Name | [1] 042810 |    | 4700 Sample Name   |               | Spectra        | 13                 |

| Rank | Protein Name                                                              | Accession No. | Protein MW | Protein Score | Protein C. I. % | Total Ion Score | Total Ion C. I. % |
|------|---------------------------------------------------------------------------|---------------|------------|---------------|-----------------|-----------------|-------------------|
| 1    | electron-transfer-flavoprotein, beta polypeptide isoform 1 [Homo sapiens] | gi 4503609    | 27826.2    | 135           | 100             | 14              | 78.09             |

| Peptide Information |             |            |            |                   |           |         |              |
|---------------------|-------------|------------|------------|-------------------|-----------|---------|--------------|
| Calc. Mass          | Obsrv. Mass | ± da ± ppm | Start Seq. | End Sequence Seq. | Ion Score | C. I. % | Modification |
| 828.5301            | 828.5347    | 0.0046     | 6          | 249               | 255       |         |              |
| 853.5253            | 853.5312    | 0.0059     | 7          | 99                | 106       |         |              |
| 1050.5652           | 1050.5626   | -0.0026    | -2         | 192               | 200       |         |              |
| 1054.6255           | 1054.6179   | -0.0076    | -7         | 177               | 186       |         |              |
| 1102.5739           | 1102.5786   | 0.0047     | 4          | 165               | 174       |         |              |

|           |           |         |    |     |     |                    |   |   |
|-----------|-----------|---------|----|-----|-----|--------------------|---|---|
| 1102.5739 | 1102.5786 | 0.0047  | 4  | 165 | 174 | EIDGGLETLR         | 4 | 0 |
| 1295.8044 | 1295.8088 | 0.0044  | 3  | 175 | 186 | LKLPVAVTADLR       | 5 | 0 |
| 1295.8044 | 1295.8088 | 0.0044  | 3  | 175 | 186 | LKLPVAVTADLR       | 5 | 0 |
| 1339.7216 | 1339.7217 | 0.0001  | 0  | 222 | 233 | LSVISVEDPPQR       |   |   |
| 1339.7216 | 1339.7217 | 0.0001  | 0  | 222 | 233 | LSVISVEDPPQR       |   |   |
| 1403.7277 | 1403.735  | 0.0073  | 5  | 86  | 98  | GHVEVPPAEAEER      | 5 | 0 |
| 1403.7277 | 1403.735  | 0.0073  | 5  | 86  | 98  | GHVEVPPAEAEER      | 5 | 0 |
| 1470.8274 | 1470.8271 | -0.0003 | 0  | 22  | 35  | VKPRDTGVVTDGVK     |   |   |
| 1486.7859 | 1486.7898 | 0.0039  | 3  | 162 | 174 | VEEIDGGLETLR       |   |   |
| 1554.9464 | 1554.9446 | -0.0018 | -1 | 111 | 124 | LAEEKEDVLLGK       |   |   |
| 1683.9526 | 1683.9391 | -0.0135 | -8 | 206 | 221 | IEVKGDLGDLTSLK     |   |   |
| 1831.8464 | 1831.8707 | 0.0243  | 13 | 36  | 51  | HSMNPFCEIAVEEAVR   |   |   |
| 1831.8464 | 1831.8707 | 0.0243  | 13 | 36  | 51  | HSMNPFCEIAVEEAVR   |   |   |
| 1905.1279 | 1905.1251 | -0.0028 | -1 | 175 | 191 | LKLPVAVTADLRLEPR   |   |   |
| 2238.2351 | 2238.2393 | 0.0042  | 2  | 86  | 106 | GHVEVPPAEAEERLGPLQ |   |   |
|           |           |         |    |     |     | VAR                |   |   |
| 2688.3118 | 2688.3362 | 0.0244  | 9  | 27  | 51  | TGVVTDGVKHSMPFCEI  |   |   |
|           |           |         |    |     |     | AVEEAVR            |   |   |

4 PREDICTED: similar to Adenylate kinase isoenzyme 4, mitochondrial (Adenylate kinase 3-like 1) (ATP-  
gi113423642 25224.2 84 99.998 7 5.016

| Peptide Information |             |            |            |                   |           |                    |              |   |
|---------------------|-------------|------------|------------|-------------------|-----------|--------------------|--------------|---|
| Calc. Mass          | Obsrv. Mass | ± da ± ppm | Start Seq. | End Sequence Seq. | Ion Score | C. I. %            | Modification |   |
| 949.5002            | 949.506     | 0.0058     | 6          | 127               | 134       | WIHPPSGR           |              |   |
| 949.5002            | 949.506     | 0.0058     | 6          | 127               | 134       | WIHPPSGR           |              |   |
| 1045.5524           | 1045.5605   | 0.0081     | 8          | 93                | 102       | TLGQAEALDK         |              |   |
| 1105.6013           | 1105.6149   | 0.0136     | 12         | 126               | 134       | RWIHPPSGR          |              |   |
| 1122.5282           | 1122.5358   | 0.0076     | 7          | 72                | 80        | LMMSELENR          |              |   |
| 1122.5282           | 1122.5358   | 0.0076     | 7          | 72                | 80        | LMMSELENR          |              |   |
| 1249.7262           | 1249.7363   | 0.0101     | 8          | 61                | 71        | SLLPVDPVITR        | 4            | 0 |
| 1249.7262           | 1249.7363   | 0.0101     | 8          | 61                | 71        | SLLPVDPVITR        | 4            | 0 |
| 1278.6293           | 1278.6471   | 0.0178     | 14         | 72                | 81        | LMMSELENRR         |              |   |
| 1325.6749           | 1325.6909   | 0.016      | 12         | 82                | 92        | GQHWLLDGFPR        |              |   |
| 1325.6749           | 1325.6909   | 0.016      | 12         | 82                | 92        | GQHWLLDGFPR        | 3            | 0 |
| 1639.8948           | 1639.9193   | 0.0245     | 15         | 8                 | 24        | AVLPGPPSGKGTVCQR   |              |   |
| 1925.0139           | 1925.0304   | 0.0165     | 9          | 25                | 41        | IAQNFGLQLHSSGHFLR  |              |   |
| 1925.0139           | 1925.0304   | 0.0165     | 9          | 25                | 41        | IAQNFGLQLHSSGHFLR  |              |   |
| 2409.2786           | 2409.2932   | 0.0146     | 6          | 25                | 45        | IAQNFGLQLHSSGHFLRE |              |   |
|                     |             |            |            |                   |           | NIK                |              |   |
| 3984.936            | 3984.9592   | 0.0232     | 6          | 135               | 170       | VYNLDFNPHVHGIDVVT  |              |   |
|                     |             |            |            |                   |           | GEPLVQEDDKPEAVAA   |              |   |
|                     |             |            |            |                   |           | R                  |              |   |

Spot Idx/Pos 162/G4 18 Instr./Spot Origin ab4700/042810 Process Status Analysis Succeeded  
Plate # Name [1] 042810 4700 Sample Name Spectra 13

Rank Protein Name Accession No. Protein MW Protein Score Protein C. I. % Total Ion Score Total Ion C. I. %  
1 electron-transfer-flavoprotein, beta polypeptide isoform gi14503609 27826.2 92 100 24 97.868

| Peptide Information |             |            |            |                   |           |                    |              |        |
|---------------------|-------------|------------|------------|-------------------|-----------|--------------------|--------------|--------|
| Calc. Mass          | Obsrv. Mass | ± da ± ppm | Start Seq. | End Sequence Seq. | Ion Score | C. I. %            | Modification |        |
| 853.5253            | 853.5281    | 0.0028     | 3          | 99                | 106       | LGPLQVAR           |              |        |
| 1102.5739           | 1102.5658   | -0.0081    | -7         | 165               | 174       | EIDGGLETLR         |              |        |
| 1102.5739           | 1102.5658   | -0.0081    | -7         | 165               | 174       | EIDGGLETLR         |              |        |
| 1295.8044           | 1295.8074   | 0.003      | 2          | 175               | 186       | LKLPVAVTADLR       | 18           | 90.519 |
| 1295.8044           | 1295.8074   | 0.003      | 2          | 175               | 186       | LKLPVAVTADLR       | 18           | 90.519 |
| 1339.7216           | 1339.7192   | -0.0024    | -2         | 222               | 233       | LSVISVEDPPQR       |              |        |
| 1339.7216           | 1339.7192   | -0.0024    | -2         | 222               | 233       | LSVISVEDPPQR       |              |        |
| 1403.7277           | 1403.7322   | 0.0045     | 3          | 86                | 98        | GHVEVPPAEAEER      |              |        |
| 1403.7277           | 1403.7322   | 0.0045     | 3          | 86                | 98        | GHVEVPPAEAEER      | 6            | 0      |
| 1831.8464           | 1831.8613   | 0.0149     | 8          | 36                | 51        | HSMNPFCEIAVEEAVR   |              |        |
| 1831.8464           | 1831.8613   | 0.0149     | 8          | 36                | 51        | HSMNPFCEIAVEEAVR   |              |        |
| 1905.1279           | 1905.1244   | -0.0035    | -2         | 175               | 191       | LKLPVAVTADLRLEPR   |              |        |
| 1905.1279           | 1905.1244   | -0.0035    | -2         | 175               | 191       | LKLPVAVTADLRLEPR   |              |        |
| 2238.2351           | 2238.2378   | 0.0027     | 1          | 86                | 106       | GHVEVPPAEAEERLGPLQ |              |        |
|                     |             |            |            |                   |           | VAR                |              |        |
| 2290.1606           | 2290.1719   | 0.0113     | 5          | 77                | 98        | TALAMGADRGHVEVPPA  |              |        |
|                     |             |            |            |                   |           | EAER               |              |        |

4 PREDICTED: similar to Adenylate kinase isoenzyme 4, mitochondrial (Adenylate kinase 3-like 1) (ATP-  
gi113423642 25224.2 69 99.906

| Peptide Information |             |            |            |                   |           |                    |              |  |
|---------------------|-------------|------------|------------|-------------------|-----------|--------------------|--------------|--|
| Calc. Mass          | Obsrv. Mass | ± da ± ppm | Start Seq. | End Sequence Seq. | Ion Score | C. I. %            | Modification |  |
| 949.5002            | 949.5016    | 0.0014     | 1          | 127               | 134       | WIHPPSGR           |              |  |
| 949.5002            | 949.5016    | 0.0014     | 1          | 127               | 134       | WIHPPSGR           |              |  |
| 1105.6013           | 1105.5948   | -0.0065    | -6         | 126               | 134       | RWIHPPSGR          |              |  |
| 1249.7262           | 1249.7294   | 0.0032     | 3          | 61                | 71        | SLLPVDPVITR        |              |  |
| 1249.7262           | 1249.7294   | 0.0032     | 3          | 61                | 71        | SLLPVDPVITR        |              |  |
| 1278.6293           | 1278.6423   | 0.013      | 10         | 72                | 81        | LMMSELENRR         |              |  |
| 1325.6749           | 1325.6772   | 0.0023     | 2          | 82                | 92        | GQHWLLDGFPR        |              |  |
| 1325.6749           | 1325.6772   | 0.0023     | 2          | 82                | 92        | GQHWLLDGFPR        |              |  |
| 1481.776            | 1481.7815   | 0.0055     | 4          | 81                | 92        | RQHWLLDGFPR        |              |  |
| 1639.8948           | 1639.8844   | -0.0104    | -6         | 8                 | 24        | AVLPGPPSGKGTVCQR   |              |  |
| 1925.0139           | 1925.0172   | 0.0033     | 2          | 25                | 41        | IAQNFGLQLHSSGHFLR  |              |  |
| 1925.0139           | 1925.0172   | 0.0033     | 2          | 25                | 41        | IAQNFGLQLHSSGHFLR  |              |  |
| 2409.2786           | 2409.2827   | 0.0041     | 2          | 25                | 45        | IAQNFGLQLHSSGHFLRE |              |  |
|                     |             |            |            |                   |           | NIK                |              |  |

Spot Idx/Pos 163/G6 19 Instr./Spot Origin ab4700/042810 Process Status Analysis Succeeded  
Plate # Name [1] 042810 4700 Sample Name Spectra 7

Rank Protein Name Accession No. Protein MW Protein Score Protein C. I. % Total Ion Score Total Ion C. I. %

Spot Idx/Pos 164/G8 20 Instr./Spot Origin ab4700/042810 Process Status Analysis Succeeded  
Plate # Name [1] 042810 4700 Sample Name Spectra 13

3 myosin, heavy polypeptide 9, non-muscle [Homo sapiens] gi12667788 226391.6 33 0

| Peptide Information |             |            |            |                   |           |                 |              |  |
|---------------------|-------------|------------|------------|-------------------|-----------|-----------------|--------------|--|
| Calc. Mass          | Obsrv. Mass | ± da ± ppm | Start Seq. | End Sequence Seq. | Ion Score | C. I. %         | Modification |  |
| 1045.571            | 1045.5795   | 0.0085     | 8          | 1558              | 1566      | LEVNLQAMK       |              |  |
| 1155.6632           | 1155.6715   | 0.0083     | 7          | 1924              | 1933      | GDLPFVPPRR      |              |  |
| 1155.6632           | 1155.6715   | 0.0083     | 7          | 1923              | 1932      | RGDLPFVPPRR     |              |  |
| 1524.8057           | 1524.8043   | -0.0014    | -1         | 290               | 301       | TDLLEPPNRYR     |              |  |
| 1558.8588           | 1558.8754   | 0.0166     | 11         | 719               | 731       | QRVELLTPNSIPK   |              |  |
| 1571.854            | 1571.8658   | 0.0118     | 8          | 374               | 387       | VSHLLGINVDFTR   |              |  |
| 1571.854            | 1571.8658   | 0.0118     | 8          | 374               | 387       | VSHLLGINVDFTR   |              |  |
| 1579.8438           | 1579.834    | -0.0098    | -6         | 765               | 778       | AGVLAHLEERDLK   |              |  |
| 1615.8181           | 1615.8287   | 0.0106     | 7          | 328               | 341       | IMGPIEEQMGLLR   |              |  |
| 1615.8181           | 1615.8287   | 0.0106     | 7          | 328               | 341       | IMGPIEEQMGLLR   |              |  |
| 1623.839            | 1623.8448   | 0.0058     | 4          | 706               | 718       | QGFFRRVVFQEFR   |              |  |
| 1643.8097           | 1643.8097   | 0          | 0          | 1                 | 14        | MAQQAADKYLVDK   |              |  |
| 1643.8097           | 1643.8097   | 0          | 0          | 1                 | 14        | MAQQAADKYLVDK   |              |  |
| 1727.856            | 1727.8778   | 0.0218     | 13         | 126               | 139       | NLPIYSEIVEMYK   |              |  |
| 1815.9082           | 1815.9271   | 0.0189     | 10         | 1816              | 1830      | IAQLEQLDNETKER  |              |  |
| 1869.9664           | 1869.9609   | -0.0055    | -3         | 1755              | 1770      | ANLQIDQINTDLNER |              |  |
| 1949.9927           | 1950.0028   | 0.0101     | 5          | 1418              | 1433      | LOQEIDLLVLDHQR  |              |  |
| 1949.9927           | 1950.0028   | 0.0101     | 5          | 1418              | 1433      | LOQEIDLLVLDHQR  |              |  |
| 2048.9626           | 2048.9705   | 0.0079     | 4          | 1677              | 1694      | SMEAEMLQDELAAR  |              |  |

|           |           |         |    |      |      |                                 |
|-----------|-----------|---------|----|------|------|---------------------------------|
| 2048.9626 | 2048.9705 | 0.0079  | 4  | 1677 | 1694 | SMEAEIMQLQEELAAER               |
| 2299.1345 | 2299.1677 | 0.0332  | 14 | 1175 | 1193 | TLEEAKEATHEAIGEMRQ<br>K         |
| 2333.0562 | 2333.0798 | 0.0236  | 10 | 941  | 959  | MOQNIQLEEEQLEEEES<br>AR         |
| 2749.3274 | 2749.3521 | 0.0247  | 9  | 1302 | 1324 | DPSALESQLDGTQELLOE<br>ENROK     |
| 3017.4797 | 3017.47   | -0.0097 | -3 | 1136 | 1162 | DLGEELEALKTELEDLTD<br>STAAQQELR |

| Peptide Information |           | Calc. Mass |    | Obsrv. Mass |      | $\pm$ da $\pm$ ppm          |  | Start Seq. | End Sequence Seq. | Ion Score | C. I. % Modification |
|---------------------|-----------|------------|----|-------------|------|-----------------------------|--|------------|-------------------|-----------|----------------------|
| 1045.5987           | 1045.5795 | -0.0022    | -9 | 105         | 113  | TELLTEALR                   |  |            |                   |           |                      |
| 1083.5656           | 1083.5759 | 0.0103     | 10 | 1406        | 1414 | YAGYPMILR                   |  |            |                   |           |                      |
| 1491.7437           | 1491.7435 | -0.0002    | 0  | 1457        | 1469 | ENGLVLEQEAFSR               |  |            |                   |           |                      |
| 1504.6854           | 1504.708  | 0.0226     | 15 | 864         | 874  | SYEFFNELYHR                 |  |            |                   |           |                      |
| 1504.6854           | 1504.708  | 0.0226     | 15 | 864         | 874  | SYEFFNELYHR                 |  |            |                   |           |                      |
| 1513.7756           | 1513.7799 | 0.0043     | 3  | 114         | 126  | FRTDFSEKGTGR                |  |            |                   |           |                      |
| 1550.7849           | 1550.7935 | 0.0086     | 6  | 225         | 236  | EPLFEQYLNLR                 |  |            |                   |           |                      |
| 1586.8285           | 1586.8195 | -0.009     | -6 | 207         | 221  | SAIDHAGNYIGSLR              |  |            |                   |           |                      |
| 1586.8285           | 1586.8195 | -0.009     | -6 | 207         | 221  | SAIDHAGNYIGSLR              |  |            |                   |           |                      |
| 1643.7958           | 1643.8097 | 0.0139     | 8  | 627         | 640  | HLHTAMFTISSDQR              |  |            |                   |           |                      |
| 1643.7958           | 1643.8097 | 0.0139     | 8  | 627         | 640  | HLHTAMFTISSDQR              |  |            |                   |           |                      |
| 1647.8448           | 1647.8569 | 0.0121     | 7  | 1456        | 1469 | RENGLEVLEQEAFSR             |  |            |                   |           |                      |
| 1699.9026           | 1699.9037 | 0.0011     | 1  | 1           | 14   | WLSLSSLRPFQEK               |  |            |                   |           |                      |
| 1712.9329           | 1712.9464 | 0.0135     | 8  | 193         | 206  | LHLFASQREEEK                |  |            |                   |           |                      |
| 1736.8754           | 1736.8877 | 0.0123     | 7  | 375         | 390  | FLATPPNGFADAVFR             |  |            |                   |           |                      |
| 1736.8754           | 1736.8877 | 0.0123     | 7  | 375         | 390  | FLATPPNGFADAVFR             |  |            |                   |           |                      |
| 1916.9487           | 1916.96   | 0.0113     | 6  | 240         | 256  | YSTDESITSLAEFVQK            |  |            |                   |           |                      |
| 1940.0269           | 1940.0266 | -0.0003    | 0  | 967         | 984  | ATVPLQSNVIEAPDMKR           |  |            |                   |           |                      |
| 1948.0176           | 1948.0352 | 0.0176     | 9  | 2099        | 2116 | AMASLETIGPLMNGMKK<br>R      |  |            |                   |           |                      |
| 1958.9817           | 1958.9923 | 0.0106     | 5  | 1603        | 1620 | GGYLAEEQATPENPTIR           |  |            |                   |           |                      |
| 2087.0767           | 2087.0789 | 0.0022     | 1  | 1603        | 1621 | GGYLAEEQATPENPTIR<br>K      |  |            |                   |           |                      |
| 2110.0637           | 2110.072  | 0.0083     | 4  | 357         | 374  | WGLLSPVDEEVESLHL<br>R       |  |            |                   |           |                      |
| 2266.219            | 2266.2039 | -0.0151    | -7 | 140         | 160  | KPVILEVTPGGFDQINPA<br>TNR   |  |            |                   |           |                      |
| 2266.219            | 2266.2039 | -0.0151    | -7 | 140         | 160  | KPVILEVTPGGFDQINPA<br>TNR   |  |            |                   |           |                      |
| 2511.334            | 2511.3438 | 0.0098     | 4  | 669         | 691  | ILPPGLLAYLESSDLVPEK<br>DADR |  |            |                   |           |                      |

| Peptide Information |           | Calc. Mass |    | Obsrv. Mass |      | $\pm$ da $\pm$ ppm          |  | Start Seq. | End Sequence Seq. | Ion Score | C. I. % Modification |
|---------------------|-----------|------------|----|-------------|------|-----------------------------|--|------------|-------------------|-----------|----------------------|
| 1045.5987           | 1045.5795 | -0.0022    | -9 | 91          | 99   | TELLTEALR                   |  |            |                   |           |                      |
| 1083.5656           | 1083.5759 | 0.0103     | 10 | 1292        | 1400 | YAGYPMILR                   |  |            |                   |           |                      |
| 1491.7437           | 1491.7435 | -0.0002    | 0  | 1443        | 1455 | ENGLVLEQEAFSR               |  |            |                   |           |                      |
| 1504.6854           | 1504.708  | 0.0226     | 15 | 850         | 860  | SYEFFNELYHR                 |  |            |                   |           |                      |
| 1504.6854           | 1504.708  | 0.0226     | 15 | 850         | 860  | SYEFFNELYHR                 |  |            |                   |           |                      |
| 1513.7756           | 1513.7799 | 0.0043     | 3  | 100         | 112  | FRTDFSEKGTGR                |  |            |                   |           |                      |
| 1550.7849           | 1550.7935 | 0.0086     | 6  | 211         | 222  | EPLFEQYLNLR                 |  |            |                   |           |                      |
| 1586.8285           | 1586.8195 | -0.009     | -6 | 193         | 207  | SAIDHAGNYIGSLR              |  |            |                   |           |                      |
| 1586.8285           | 1586.8195 | -0.009     | -6 | 193         | 207  | SAIDHAGNYIGSLR              |  |            |                   |           |                      |
| 1643.7958           | 1643.8097 | 0.0139     | 8  | 613         | 626  | HLHTAMFTISSDQR              |  |            |                   |           |                      |
| 1643.7958           | 1643.8097 | 0.0139     | 8  | 613         | 626  | HLHTAMFTISSDQR              |  |            |                   |           |                      |
| 1647.8448           | 1647.8569 | 0.0121     | 7  | 1442        | 1455 | RENGLEVLEQEAFSR             |  |            |                   |           |                      |
| 1712.9329           | 1712.9464 | 0.0135     | 8  | 179         | 192  | LHLFASQREEEK                |  |            |                   |           |                      |
| 1736.8754           | 1736.8877 | 0.0123     | 7  | 361         | 376  | FLATPPNGFADAVFR             |  |            |                   |           |                      |
| 1736.8754           | 1736.8877 | 0.0123     | 7  | 361         | 376  | FLATPPNGFADAVFR             |  |            |                   |           |                      |
| 1916.9487           | 1916.96   | 0.0113     | 6  | 226         | 242  | YSTDESITSLAEFVQK            |  |            |                   |           |                      |
| 1940.0269           | 1940.0266 | -0.0003    | 0  | 953         | 970  | ATVPLQSNVIEAPDMKR           |  |            |                   |           |                      |
| 1948.0176           | 1948.0352 | 0.0176     | 9  | 2085        | 2102 | AMASLETIGPLMNGMKK<br>R      |  |            |                   |           |                      |
| 1958.9817           | 1958.9923 | 0.0106     | 5  | 1589        | 1606 | GGYLAEEQATPENPTIR           |  |            |                   |           |                      |
| 2087.0767           | 2087.0789 | 0.0022     | 1  | 1589        | 1607 | GGYLAEEQATPENPTIR<br>K      |  |            |                   |           |                      |
| 2110.0637           | 2110.072  | 0.0083     | 4  | 343         | 360  | WGLLSPVDEEVESLHL<br>R       |  |            |                   |           |                      |
| 2266.219            | 2266.2039 | -0.0151    | -7 | 126         | 146  | KPVILEVTPGGFDQINPA<br>TNR   |  |            |                   |           |                      |
| 2266.219            | 2266.2039 | -0.0151    | -7 | 126         | 146  | KPVILEVTPGGFDQINPA<br>TNR   |  |            |                   |           |                      |
| 2511.334            | 2511.3438 | 0.0098     | 4  | 655         | 677  | ILPPGLLAYLESSDLVPEK<br>DADR |  |            |                   |           |                      |

|                |              |               |                    |               |                 |                    |                   |
|----------------|--------------|---------------|--------------------|---------------|-----------------|--------------------|-------------------|
| Spot Idx/Pos   | 165/G10      | 21            | Instr./Spot Origin | ab4700/042810 | Process Status  | Analysis Succeeded |                   |
| Plate [#] Name | [1] 042810   |               | 4700 Sample Name   |               | Spectra         | 13                 |                   |
| Rank           | Protein Name | Accession No. | Protein MW         | Protein Score | Protein C. I. % | Total Ion Score    | Total Ion C. I. % |

| Peptide Information |           | Calc. Mass |     | Obsrv. Mass |     | $\pm$ da $\pm$ ppm           |  | Start Seq. | End Sequence Seq. | Ion Score | C. I. % Modification |
|---------------------|-----------|------------|-----|-------------|-----|------------------------------|--|------------|-------------------|-----------|----------------------|
| 975.5006            | 975.5065  | 0.0059     | 6   | 452         | 458 | TDLRWER                      |  |            |                   |           |                      |
| 1048.6149           | 1048.6255 | 0.0106     | 10  | 491         | 499 | ILKGEYAVR                    |  |            |                   |           |                      |
| 1111.6832           | 1111.6978 | 0.0146     | 13  | 320         | 330 | ELLIGGVAAR                   |  |            |                   |           |                      |
| 1111.6832           | 1111.6978 | 0.0146     | 13  | 320         | 330 | ELLIGGVAAR                   |  |            |                   |           |                      |
| 1380.8684           | 1380.8784 | 0.01       | 7   | 318         | 330 | LRELLIGGVAAR                 |  |            |                   |           |                      |
| 1386.7239           | 1386.7271 | 0.0032     | 2   | 422         | 432 | IMHEFTWDLK                   |  |            |                   |           |                      |
| 1467.7664           | 1467.7736 | 0.0072     | 5   | 211         | 223 | DLGLAFEIPPHMK                |  |            |                   |           |                      |
| 1610.8068           | 1610.8232 | 0.0164     | 10  | 387         | 400 | MHNQIPVTSQDKR                |  |            |                   |           |                      |
| 1663.8948           | 1663.8997 | 0.0049     | 3   | 563         | 577 | KGDRFLICTDAAR                |  |            |                   |           |                      |
| 1766.9258           | 1766.9036 | -0.0222    | -13 | 208         | 223 | NGKDLGLAFEIPPHMK             |  |            |                   |           |                      |
| 1916.0421           | 1916.0293 | -0.0128    | -7  | 400         | 416 | RLQVGSATLHFSDFVK             |  |            |                   |           |                      |
| 1968.0396           | 1968.0426 | 0.003      | 2   | 331         | 349 | DQLSVLENGVDIVVGTGPG<br>R     |  |            |                   |           |                      |
| 1968.0396           | 1968.0426 | 0.003      | 2   | 331         | 349 | DQLSVLENGVDIVVGTGPG<br>R     |  |            |                   |           |                      |
| 2002.9287           | 2002.9384 | 0.0097     | 5   | 473         | 490 | DNTRPGANSPMWESEAI<br>K       |  |            |                   |           |                      |
| 2002.9287           | 2002.9384 | 0.0097     | 5   | 473         | 490 | DNTRPGANSPMWESEAI<br>K       |  |            |                   |           |                      |
| 2025.0399           | 2025.0447 | 0.0048     | 2   | 433         | 451 | GEDSVPDTHVHVVPVNV<br>PK      |  |            |                   |           |                      |
| 2079.1121           | 2079.1104 | -0.0017    | -1  | 578         | 596 | GIDHGVPPYINVTLPDEK           |  |            |                   |           |                      |
| 2134.1079           | 2134.1169 | 0.009      | 4   | 721         | 738 | EAQTSFLHGLYLPNQLFR           |  |            |                   |           |                      |
| 2134.1079           | 2134.1169 | 0.009      | 4   | 721         | 738 | EAQTSFLHGLYLPNQLFR           |  |            |                   |           |                      |
| 2138.1814           | 2138.1704 | -0.011     | -5  | 289         | 307 | ALIVPSRELAETLNLIK            |  |            |                   |           |                      |
| 2372.1768           | 2372.178  | 0.0012     | 1   | 366         | 386 | FLVLEADGLLSQGSYDF<br>INR     |  |            |                   |           |                      |
| 2372.1768           | 2372.178  | 0.0012     | 1   | 366         | 386 | FLVLEADGLLSQGSYDF<br>INR     |  |            |                   |           |                      |
| 2876.5051           | 2876.4907 | -0.0144    | -5  | 578         | 602 | GIDHGVPPYINVTLPDEK<br>QNYVHR |  |            |                   |           |                      |

2876.5051 2876.4907 -0.0144 -5 578 602 GIDHGVPIVINTLPDEK  
QNYVHR

2896.5261 2896.4885 -0.0376 -13 331 358 DQLSVLENGDIVVGTGP  
RLDDLVTGK

3 chaperone protein HSP90 beta [Homo sapiens] gi|9082289 72827.8 58 98.916

Peptide Information

| Calc. Mass | Obsrv. Mass | ± da ± ppm | Start Seq. | End Sequence Seq. | Ion Score | C. I. % | Modification |
|------------|-------------|------------|------------|-------------------|-----------|---------|--------------|
| 829.5505   | 829.5417    | -0.0088    | -11        | 106               | 112       | K       |              |
| 886.5468   | 886.5516    | 0.0048     | 5          | 358               | 364       | R       |              |
| 1236.6371  | 1236.6489   | 0.0118     | 10         | 246               | 255       | R       |              |
| 1237.6283  | 1237.6427   | 0.0144     | 12         | 77                | 88        | R       |              |
| 1348.6643  | 1348.6775   | 0.0132     | 10         | 228               | 238       | R       |              |
| 1348.6643  | 1348.6775   | 0.0132     | 10         | 228               | 238       | R       |              |
| 1513.7856  | 1513.8082   | 0.0226     | 15         | 287               | 300       | R       |              |
| 1649.8744  | 1649.8676   | -0.0068    | -4         | 180               | 192       | R       |              |
| 1782.9497  | 1782.9545   | 0.0048     | 3          | 533               | 547       | R       |              |
| 1782.9497  | 1782.9545   | 0.0048     | 3          | 533               | 547       | R       |              |
| 1808.9581  | 1808.9552   | -0.0029    | -2         | 113               | 127       | R       |              |
| 1911.0446  | 1911.0511   | 0.0065     | 3          | 532               | 547       | R       |              |
| 2015.0443  | 2015.0457   | 0.0014     | 1          | 89                | 104       | R       |              |
| 2015.0443  | 2015.0457   | 0.0014     | 1          | 89                | 104       | R       |              |
| 2171.1455  | 2171.146    | 0.0005     | 0          | 89                | 105       | R       |              |
| 2176.9451  | 2176.9678   | 0.0227     | 10         | 365               | 383       | R       |              |
| 2176.9451  | 2176.9678   | 0.0227     | 10         | 365               | 383       | R       |              |
| 2255.9587  | 2255.9744   | 0.0157     | 7          | 57                | 76        | R       |              |
| 2255.9587  | 2255.9744   | 0.0157     | 7          | 57                | 76        | R       |              |
| 2317.1243  | 2317.0999   | -0.0244    | -11        | 268               | 286       | R       |              |
| 2391.1826  | 2391.1809   | -0.0017    | -1         | 390               | 410       | R       |              |

4 ribonucleotide reductase M1 subunit [Homo sapiens] gi|5006420 89984.5 58 98.839

Peptide Information

| Calc. Mass | Obsrv. Mass | ± da ± ppm | Start Seq. | End Sequence Seq. | Ion Score | C. I. % | Modification |
|------------|-------------|------------|------------|-------------------|-----------|---------|--------------|
| 1096.5819  | 1096.5847   | 0.0028     | 3          | 13                | 21        | R       |              |
| 1126.6003  | 1126.6104   | 0.0101     | 9          | 71                | 80        | R       |              |
| 1344.748   | 1344.7441   | -0.0039    | -3         | 119               | 130       | R       |              |
| 1367.7035  | 1367.7137   | 0.0102     | 7          | 163               | 173       | R       |              |
| 1367.7035  | 1367.7137   | 0.0102     | 7          | 163               | 173       | R       |              |
| 1509.7842  | 1509.7776   | -0.0066    | -4         | 10                | 21        | R       |              |
| 1570.87    | 1570.869    | -0.001     | 1          | 741               | 754       | R       |              |
| 1693.9635  | 1693.9425   | -0.021     | -12        | 629               | 643       | R       |              |
| 1828.0074  | 1827.9912   | -0.0162    | -9         | 741               | 756       | R       |              |
| 1850.0646  | 1850.0602   | -0.0044    | -2         | 628               | 643       | R       |              |
| 2064.1533  | 2064.1414   | -0.0119    | -6         | 498               | 516       | R       |              |
| 2093.0444  | 2093.0535   | 0.0091     | 4          | 257               | 277       | R       |              |
| 2198.0845  | 2198.0823   | -0.0022    | -1         | 480               | 497       | R       |              |
| 2302.1462  | 2302.1604   | 0.0142     | 6          | 699               | 719       | R       |              |
| 2333.1235  | 2333.1125   | -0.011     | -5         | 131               | 149       | R       |              |
| 2391.2019  | 2391.1809   | -0.021     | -9         | 140               | 158       | R       |              |
| 2572.3252  | 2572.3203   | -0.0049    | -2         | 174               | 196       | R       |              |
| 3579.7998  | 3579.7856   | -0.0142    | -4         | 595               | 627       | R       |              |

Spot Idx/Pos 166/G12 22 Instr./Spot Origin ab4700/042810 Process Status Analysis Succeeded  
Plate # Name [1] 042810 4700 Sample Name Spectra 13

Rank Protein Name Accession No. Protein MW Protein Score Protein C. I. % Total Ion Score Total Ion C. I. %

1 heat shock 90kDa protein 1, beta [Homo sapiens] gi|20149594 83212.1 134 100 1 0

Peptide Information

| Calc. Mass | Obsrv. Mass | ± da ± ppm | Start Seq. | End Sequence Seq. | Ion Score | C. I. % | Modification |
|------------|-------------|------------|------------|-------------------|-----------|---------|--------------|
| 829.5294   | 829.5364    | 0.007      | 8          | 331               | 337       | R       |              |
| 886.5468   | 886.5482    | 0.0014     | 2          | 450               | 456       | R       |              |
| 901.5254   | 901.524     | -0.0014    | -2         | 285               | 291       | R       |              |
| 1194.6477  | 1194.6538   | 0.0061     | 5          | 73                | 82        | R       |              |
| 1236.6371  | 1236.6494   | 0.0123     | 10         | 338               | 347       | R       |              |
| 1249.6171  | 1249.635    | 0.0179     | 14         | 492               | 502       | R       |              |
| 1348.6643  | 1348.6707   | 0.0064     | 5          | 320               | 330       | R       |              |
| 1348.6643  | 1348.6707   | 0.0064     | 5          | 320               | 330       | R       |              |
| 1364.7321  | 1364.7297   | -0.0024    | -2         | 338               | 348       | R       |              |
| 1513.7856  | 1513.7952   | 0.0096     | 6          | 379               | 392       | R       |              |
| 1513.7856  | 1513.7952   | 0.0096     | 6          | 379               | 392       | R       |              |
| 1544.8278  | 1544.8197   | -0.0081    | -5         | 42                | 55        | R       |              |
| 1564.8693  | 1564.8527   | -0.0166    | -11        | 70                | 82        | R       |              |
| 1649.8744  | 1649.8595   | -0.0149    | -9         | 272               | 284       | R       |              |
| 1782.9497  | 1782.9604   | 0.0107     | 6          | 625               | 639       | R       |              |
| 1782.9497  | 1782.9604   | 0.0107     | 6          | 625               | 639       | R       |              |
| 1808.9581  | 1808.9512   | -0.0069    | -4         | 205               | 219       | R       |              |
| 1847.797   | 1847.8038   | 0.0068     | 4          | 292               | 306       | R       |              |
| 1911.0446  | 1911.0476   | 0.003      | 2          | 624               | 639       | R       |              |
| 1911.0446  | 1911.0476   | 0.003      | 2          | 624               | 639       | R       |              |
| 2015.0443  | 2015.0425   | -0.0018    | -1         | 181               | 196       | R       |              |
| 2015.0443  | 2015.0425   | -0.0018    | -1         | 181               | 196       | R       |              |
| 2034.0654  | 2034.0372   | -0.0282    | -14        | 276               | 291       | R       |              |
| 2059.0051  | 2059.009    | 0.0039     | 2          | 412               | 428       | R       |              |
| 2171.1455  | 2171.155    | 0.0095     | 4          | 181               | 197       | R       |              |
| 2176.9451  | 2176.9622   | 0.0171     | 8          | 457               | 475       | R       |              |
| 2176.9451  | 2176.9622   | 0.0171     | 8          | 457               | 475       | R       |              |
| 2255.9587  | 2255.97     | 0.0113     | 5          | 149               | 168       | R       |              |
| 2255.9587  | 2255.97     | 0.0113     | 5          | 149               | 168       | R       |              |
| 2317.1243  | 2317.1086   | -0.0157    | -7         | 360               | 378       | R       |              |
| 2358.1968  | 2358.1667   | -0.0301    | -13        | 379               | 399       | R       |              |
| 2369.1882  | 2369.1697   | -0.0185    | -8         | 429               | 448       | R       |              |
| 2391.1826  | 2391.1763   | -0.0063    | -3         | 482               | 502       | R       |              |
| 2988.5312  | 2988.5474   | 0.0162     | 5          | 653               | 679       | R       |              |

6 DEAD (Asp-Glu-Ala-Asp) box polypeptide 1 [Homo sapiens] gi|4826686 82379.8 87 99.999 1 0

Peptide Information

| Calc. Mass | Obsrv. Mass | ± da ± ppm | Start Seq. | End Sequence Seq. | Ion Score | C. I. % | Modification |
|------------|-------------|------------|------------|-------------------|-----------|---------|--------------|
| 901.5253   | 901.524     | -0.0013    | -1         | 455               | 461       | R       |              |
| 975.5006   | 975.4911    | -0.0095    | -10        | 452               | 458       | R       |              |

|           |           |         |     |     |     |                                  |
|-----------|-----------|---------|-----|-----|-----|----------------------------------|
| 1048.6149 | 1048.6185 | 0.0036  | 3   | 491 | 499 | ILKGEYAVR                        |
| 1111.6832 | 1111.6936 | 0.0104  | 9   | 320 | 330 | ELLIGGVAAAR                      |
| 1111.6832 | 1111.6936 | 0.0104  | 9   | 320 | 330 | ELLIGGVAAAR                      |
| 1380.8684 | 1380.8829 | 0.0145  | 11  | 318 | 330 | LRLELLIGGVAAAR                   |
| 1386.7239 | 1386.7163 | -0.0076 | -5  | 422 | 432 | IMHFFTVVDLK                      |
| 1467.7664 | 1467.7673 | 0.0009  | 1   | 211 | 223 | DLGLAFEIPHHK                     |
| 1610.8068 | 1610.8152 | 0.0084  | 5   | 387 | 400 | MHNQIPIQVTSQDKR                  |
| 1663.8948 | 1663.8977 | 0.0029  | 2   | 563 | 577 | KGDVRFLLCTDVAAR                  |
| 1759.941  | 1759.9385 | -0.0025 | -1  | 401 | 416 | LQVIVCSATLHSPFDVK                |
| 1766.3258 | 1766.3109 | -0.0149 | -8  | 208 | 223 | NGKDLGLAFEIPHHK                  |
| 1968.0396 | 1968.0535 | 0.0139  | 7   | 331 | 349 | DQLSVLENGDIVVGTGPG<br>R          |
| 1968.0396 | 1968.0535 | 0.0139  | 7   | 331 | 349 | DQLSVLENGDIVVGTGPG<br>R          |
| 1972.0724 | 1972.047  | -0.0254 | -13 | 417 | 432 | KLSEKIMHFFTVVDLK                 |
| 2002.9287 | 2002.9343 | 0.0056  | 3   | 473 | 490 | DNTRPGANSPERMWSEAI<br>K          |
| 2002.9287 | 2002.9343 | 0.0056  | 3   | 473 | 490 | DNTRPGANSPERMWSEAI<br>K          |
| 2079.1121 | 2079.095  | -0.0171 | -8  | 578 | 596 | GIDIHGVPYVINVLPDEK               |
| 2134.1079 | 2134.1172 | 0.0093  | 4   | 721 | 738 | EAQTSFLHLGYPNLQFR                |
| 2134.1079 | 2134.1172 | 0.0093  | 4   | 721 | 738 | EAQTSFLHLGYPNLQFR                |
| 2138.1814 | 2138.1819 | 0.0005  | 0   | 289 | 307 | ALIVEPSRELAETLNLIK               |
| 2372.1768 | 2372.179  | 0.0022  | 1   | 366 | 386 | FLVLEADGLLSQGYSDF<br>INR         |
| 2372.1768 | 2372.179  | 0.0022  | 1   | 366 | 386 | FLVLEADGLLSQGYSDF<br>INR         |
| 2564.3606 | 2564.3567 | -0.0039 | -2  | 53  | 75  | TGAFSIPVIQIVYETLKDQ<br>QEGK      |
| 2876.5051 | 2876.5066 | 0.0015  | 1   | 578 | 602 | GIDIHGVPYVINVLPDEK<br>QNYVHR     |
| 2896.5261 | 2896.5046 | -0.0215 | -7  | 331 | 358 | DQLSVLENGDIVVGTGPG<br>RLDDVYETGK |

|              |            |    |                    |               |                |                    |
|--------------|------------|----|--------------------|---------------|----------------|--------------------|
| Spot Idx/Pos | 167/G14    | 23 | Instr./Spot Origin | ab4700/042810 | Process Status | Analysis Succeeded |
| Plate #/Name | [1] 042810 |    | 4700 Sample Name   |               | Spectra        | 13                 |

| Rank | Protein Name | Accession No. | Protein MW | Protein Score | Protein C. I. % | Total Ion Score | Total Ion C. I. % |
|------|--------------|---------------|------------|---------------|-----------------|-----------------|-------------------|
|------|--------------|---------------|------------|---------------|-----------------|-----------------|-------------------|

| 1                   | crystallin, zeta variant [Homo sapiens] | gi 62089008 | 35384.7    | 83           | 99.996    | 10                             | 70.02        |
|---------------------|-----------------------------------------|-------------|------------|--------------|-----------|--------------------------------|--------------|
| Peptide Information |                                         |             |            |              |           |                                |              |
| Calc. Mass          | Obsrv. Mass                             | ± da ± ppm  | Start Seq. | End Sequence | Ion Score | C. I. %                        | Modification |
| 1054.564            | 1054.5559                               | -0.0081     | -8         | 235          | 244       | DLSLSHGGR                      |              |
| 1221.6512           | 1221.6334                               | -0.0178     | -15        | 15           | 25        | VFEFGGPEVLK                    |              |
| 1221.6512           | 1221.6334                               | -0.0178     | -15        | 15           | 25        | VFEFGGPEVLK                    |              |
| 1249.6755           | 1249.6769                               | 0.0014      | 1          | 1            | 11        | ITMATGQKLMR                    |              |
| 1527.7954           | 1527.7863                               | -0.0091     | -6         | 127          | 140       | QGAAGIPYFTAYR                  |              |
| 1527.7954           | 1527.7863                               | -0.0091     | -6         | 127          | 140       | QGAAGIPYFTAYR                  |              |
| 1557.7842           | 1557.7846                               | 0.0006      | 0          | 44           | 57        | VHAGGVNMPVYR                   | 10 70.02     |
| 1633.8557           | 1633.8478                               | -0.0079     | -5         | 190          | 203       | IVLQNGAHEVFNHR                 |              |
| 1633.8557           | 1633.8478                               | -0.0079     | -5         | 190          | 203       | IVLQNGAHEVFNHR                 |              |
| 1773.0269           | 1773.0081                               | -0.0188     | -11        | 28           | 43        | SDIAVPIPKDHQVLK                |              |
| 2123.1025           | 2123.1028                               | 0.0003      | 0          | 150          | 172       | AGESVLVHGASGGVGLA<br>ACQIAR    |              |
| 2123.1025           | 2123.1028                               | 0.0003      | 0          | 150          | 172       | AGESVLVHGASGGVGLA<br>ACQIAR    |              |
| 2391.26             | 2391.2693                               | 0.0093      | 4          | 37           | 57        | DHQLVLIKVHACGVNPNVET<br>YR     |              |
| 2551.2351           | 2551.2666                               | 0.0315      | 12         | 95           | 118       | VFTSSTISGGYAEYALAA<br>DHTVYK   |              |
| 2716.4192           | 2716.4446                               | 0.0254      | 9          | 64           | 90        | KPLLPTYPSDVAGVIEA<br>VGDNASAFK |              |
| 2804.4436           | 2804.4668                               | 0.0232      | 8          | 178          | 203       | VLGTAGTEEGKIVLQNG<br>AHEVFNHR  |              |
| 2844.5142           | 2844.4875                               | -0.0267     | -9         | 64           | 91        | KPLLPTYPSDVAGVIEA<br>VGDNASAFK |              |

| 2                   | mitochondrial malate dehydrogenase 2, NAD [Homo sapiens] | gi 89574129 | 31948.8    | 77           | 99.986    | 20                             | 97.029       |
|---------------------|----------------------------------------------------------|-------------|------------|--------------|-----------|--------------------------------|--------------|
| Peptide Information |                                                          |             |            |              |           |                                |              |
| Calc. Mass          | Obsrv. Mass                                              | ± da ± ppm  | Start Seq. | End Sequence | Ion Score | C. I. %                        | Modification |
| 1147.6581           | 1147.6473                                                | -0.0108     | -9         | 171          | 182       | VNVPVIGGHAGK                   |              |
| 1233.7201           | 1233.7104                                                | -0.0097     | -8         | 145          | 155       | IFGVTTLDIR                     |              |
| 1233.7201           | 1233.7104                                                | -0.0097     | -8         | 145          | 155       | IFGVTTLDIR                     | 14 87.003    |
| 1281.6982           | 1281.6901                                                | -0.0081     | -6         | 71           | 83        | GCDDVVIPAGVPR                  |              |
| 1454.7056           | 1454.6948                                                | -0.0108     | -7         | 221          | 236       | AGAGSATLSMAYAGAR               |              |
| 1454.7056           | 1454.6948                                                | -0.0108     | -7         | 221          | 236       | AGAGSATLSMAYAGAR               |              |
| 1560.8016           | 1560.7906                                                | -0.011      | -7         | 195          | 208       | VDFPQDQLTALTGR                 | 6 30.843     |
| 1560.8016           | 1560.7906                                                | -0.011      | -7         | 195          | 208       | VDFPQDQLTALTGR                 |              |
| 1793.0894           | 1793.0842                                                | -0.0052     | -3         | 6            | 24        | VAVLGASGGIGQLSLLL<br>K         |              |
| 1916.9309           | 1916.9399                                                | 0.009       | 5          | 259          | 275       | SOETECTYFSTPLLLGK              |              |
| 2143.1658           | 2143.1716                                                | 0.0058      | 3          | 137          | 155       | HGVYNNPKIFGVITLDIR<br>R        |              |
| 2143.1658           | 2143.1716                                                | 0.0058      | 3          | 137          | 155       | HGVYNNPKIFGVITLDIR<br>R        |              |
| 2365.2397           | 2365.2437                                                | 0.004       | 2          | 32           | 53        | LTLYDIAHTPGVAADLSHI<br>ETK     |              |
| 2365.2397           | 2365.2437                                                | 0.004       | 2          | 32           | 53        | LTLYDIAHTPGVAADLSHI<br>ETK     |              |
| 2695.3945           | 2695.4033                                                | 0.0088      | 3          | 58           | 83        | GVLGPEQLDCLKGCDDV<br>VVIPAGVPR |              |
| 2855.5334           | 2855.554                                                 | 0.0206      | 7          | 183          | 208       | TIPLISQCTPKVDFPQDQ<br>LTALTGR  |              |

| 7                   | glyceraldehyde-3-phosphate dehydrogenase [Homo sapiens] | gi 31645   | 36031.4    | 72           | 99.957    |                             |              |
|---------------------|---------------------------------------------------------|------------|------------|--------------|-----------|-----------------------------|--------------|
| Peptide Information |                                                         |            |            |              |           |                             |              |
| Calc. Mass          | Obsrv. Mass                                             | ± da ± ppm | Start Seq. | End Sequence | Ion Score | C. I. %                     | Modification |
| 1330.6493           | 1330.6451                                               | -0.0042    | -3         | 324          | 335       | VVDLMAHMASKE                |              |
| 1473.7729           | 1473.7878                                               | 0.0149     | 10         | 235          | 248       | VPTANVSVVDLTCR              |              |
| 1613.9008           | 1613.8972                                               | -0.0037    | -2         | 67           | 80        | LVINGNPITIFQER              |              |
| 1613.9008           | 1613.8972                                               | -0.0037    | -2         | 67           | 80        | LVINGNPITIFQER              |              |
| 1646.8933           | 1646.8862                                               | -0.0071    | -4         | 220          | 234       | VIPELDGLKGMAFR              |              |
| 1763.8022           | 1763.7977                                               | -0.0045    | -3         | 310          | 323       | LISWYDNEFGYSNR              |              |
| 1763.8022           | 1763.7977                                               | -0.0045    | -3         | 310          | 323       | LISWYDNEFGYSNR              |              |
| 2041.1075           | 2041.1089                                               | 0.0014     | 1          | 67           | 84        | LVINGNPITIFQERDPSK          |              |
| 2041.1075           | 2041.1089                                               | 0.0014     | 1          | 67           | 84        | LVINGNPITIFQERDPSK          |              |
| 2113.3999           | 2113.3384                                               | -0.0015    | -1         | 62           | 80        | AENGLVINGNPITIFQER          |              |
| 2277.0378           | 2277.0623                                               | 0.0245     | 11         | 87           | 107       | WGDAGAEYVVESTGVFT<br>TMEK   |              |
| 2369.2104           | 2369.2415                                               | 0.0311     | 13         | 118          | 139       | RVIISAPSADAPMFVGMV<br>NHEK  |              |
| 2518.2168           | 2518.2429                                               | 0.0261     | 10         | 85           | 107       | KWGDAGAEYVVESTGV<br>FTTMEK  |              |
| 2540.3467           | 2540.3274                                               | -0.0193    | -8         | 62           | 84        | AENGLVINGNPITIFQER<br>DPSK  |              |
| 2595.3599           | 2595.3623                                               | 0.0024     | 1          | 163          | 186       | VHDFNGIVEGLMTTVHAI<br>TATQK |              |

| 2933.4534                  | 2933.4802                                    | 0.0268     | 9          | 119      | 145                                | VIISAPSADAPMFVGMV<br>HEKYDNSLK |                |              |               |  |  |  |
|----------------------------|----------------------------------------------|------------|------------|----------|------------------------------------|--------------------------------|----------------|--------------|---------------|--|--|--|
| <b>12</b>                  | <b>uracil DNA glycosylase [Homo sapiens]</b> |            |            |          | <b>gi 35053</b>                    |                                | <b>35470.1</b> | <b>57</b>    | <b>98.784</b> |  |  |  |
| <b>Peptide Information</b> |                                              |            |            |          |                                    |                                |                |              |               |  |  |  |
| Calc. Mass                 | Obsrv. Mass                                  | ± da ± ppm | Start Seq. | End Seq. | Sequence                           | Ion Score                      | C. I. %        | Modification |               |  |  |  |
| 1473.7729                  | 1473.7878                                    | 0.0149     | 10         | 234      | 247 VPTANVSVVLTTCR                 |                                |                |              |               |  |  |  |
| 1613.9009                  | 1613.8972                                    | -0.0037    | -2         | 67       | 80 LVINGNPITIFQER                  |                                |                |              |               |  |  |  |
| 1613.9009                  | 1613.8972                                    | -0.0037    | -2         | 67       | 80 LVINGNPITIFQER                  |                                |                |              |               |  |  |  |
| 1763.8022                  | 1763.7977                                    | -0.0045    | -3         | 309      | 322 LISWYDNEFGYSNR                 |                                |                |              |               |  |  |  |
| 1763.8022                  | 1763.7977                                    | -0.0045    | -3         | 309      | 322 LISWYDNEFGYSNR                 |                                |                |              |               |  |  |  |
| 2041.1075                  | 2041.1089                                    | 0.0014     | 1          | 67       | 84 LVINGNPITIFQERDPSK              |                                |                |              |               |  |  |  |
| 2041.1075                  | 2041.1089                                    | 0.0014     | 1          | 67       | 84 LVINGNPITIFQERDPSK              |                                |                |              |               |  |  |  |
| 2113.1399                  | 2113.1384                                    | -0.0015    | -1         | 62       | 80 AENGLKLVINGNPITIFQER            |                                |                |              |               |  |  |  |
| 2277.0378                  | 2277.0623                                    | 0.0245     | 11         | 87       | 107 WGDAGAEYVVESTGVFT<br>TMEK      |                                |                |              |               |  |  |  |
| 2369.2104                  | 2369.2415                                    | 0.0311     | 13         | 118      | 139 RVIISAPSADAPMFVGMV<br>NHEK     |                                |                |              |               |  |  |  |
| 2518.2168                  | 2518.2429                                    | 0.0261     | 10         | 85       | 107 IKWGDAGAEYVVESTGV<br>FTTMEK    |                                |                |              |               |  |  |  |
| 2540.3467                  | 2540.3274                                    | -0.0193    | -8         | 62       | 84 AENGLKLVINGNPITIFQER<br>DPSK    |                                |                |              |               |  |  |  |
| 2595.3599                  | 2595.3623                                    | 0.0024     | 1          | 163      | 186 VHDNFGIVEGLMTTVHAI<br>TATQK    |                                |                |              |               |  |  |  |
| 2933.4534                  | 2933.4802                                    | 0.0268     | 9          | 119      | 145 VIISAPSADAPMFVGMV<br>HEKYDNSLK |                                |                |              |               |  |  |  |

|                     |                     |                      |                           |                      |                        |                           |                          |
|---------------------|---------------------|----------------------|---------------------------|----------------------|------------------------|---------------------------|--------------------------|
| <b>Spot Idx/Pos</b> | <b>168/G16</b>      | <b>24</b>            | <b>Instr./Spot Origin</b> | <b>ab4700/042810</b> | <b>Process Status</b>  | <b>Analysis Succeeded</b> |                          |
| <b>Plate #/Name</b> | <b>[1] 042810</b>   |                      | <b>4700 Sample Name</b>   |                      | <b>Spectra</b>         | <b>13</b>                 |                          |
| <b>Rank</b>         | <b>Protein Name</b> | <b>Accession No.</b> | <b>Protein MW</b>         | <b>Protein Score</b> | <b>Protein C. I. %</b> | <b>Total Ion Score</b>    | <b>Total Ion C. I. %</b> |

| <b>1</b>                   | <b>glyceraldehyde-3-phosphate dehydrogenase [Homo sapiens]</b> | <b>gi 89573929</b> | <b>24604.7</b> | <b>107</b> | <b>100</b>                         | <b>2</b>  | <b>0</b> |              |
|----------------------------|----------------------------------------------------------------|--------------------|----------------|------------|------------------------------------|-----------|----------|--------------|
| <b>Peptide Information</b> |                                                                |                    |                |            |                                    |           |          |              |
| Calc. Mass                 | Obsrv. Mass                                                    | ± da ± ppm         | Start Seq.     | End Seq.   | Sequence                           | Ion Score | C. I. %  | Modification |
| 1473.7729                  | 1473.845                                                       | 0.0721             | 49             | 210        | 223 VPTANVSVVLTTCR                 |           |          |              |
| 1613.9009                  | 1613.9684                                                      | 0.0675             | 42             | 42         | 55 LVINGNPITIFQER                  |           |          |              |
| 1613.9009                  | 1613.9684                                                      | 0.0675             | 42             | 42         | 55 LVINGNPITIFQER                  | 2         | 0        |              |
| 1645.9093                  | 1645.9819                                                      | 0.0526             | 32             | 195        | 209 VIPELNGKLTGMFAFR               |           |          |              |
| 2041.1075                  | 2041.1807                                                      | 0.0732             | 36             | 42         | 59 LVINGNPITIFQERDPSK              |           |          |              |
| 2041.1075                  | 2041.1807                                                      | 0.0732             | 36             | 42         | 59 LVINGNPITIFQERDPSK              |           |          |              |
| 2113.1399                  | 2113.2173                                                      | 0.0774             | 37             | 37         | 55 AENGLKLVINGNPITIFQER            |           |          |              |
| 2213.1091                  | 2213.1819                                                      | 0.0728             | 33             | 94         | 114 VIISAPSADAPMFVGMV<br>HEK       |           |          |              |
| 2213.1091                  | 2213.1819                                                      | 0.0728             | 33             | 94         | 114 VIISAPSADAPMFVGMV<br>HEK       |           |          |              |
| 2277.0378                  | 2277.1165                                                      | 0.0787             | 35             | 62         | 82 WGDAGAEYVVESTGVFT<br>TMEK       |           |          |              |
| 2369.2104                  | 2369.3091                                                      | 0.0987             | 42             | 93         | 114 RVIISAPSADAPMFVGMV<br>NHEK     |           |          |              |
| 2518.2168                  | 2518.3201                                                      | 0.1033             | 41             | 60         | 82 IKWGDAGAEYVVESTGV<br>FTTMEK     |           |          |              |
| 2540.3467                  | 2540.3562                                                      | 0.0095             | 4              | 37         | 59 AENGLKLVINGNPITIFQER<br>DPSK    |           |          |              |
| 2595.3599                  | 2595.4463                                                      | 0.0864             | 33             | 138        | 161 VHDNFGIVEGLMTTVHAI<br>TATQK    |           |          |              |
| 2595.3599                  | 2595.4463                                                      | 0.0864             | 33             | 138        | 161 VHDNFGIVEGLMTTVHAI<br>TATQK    |           |          |              |
| 2617.5034                  | 2617.417                                                       | -0.0864            | -33            | 176        | 202 GALQNIIPASTGAAKAVG<br>KVPELNGK |           |          |              |
| 2933.4534                  | 2933.5596                                                      | 0.1062             | 36             | 94         | 120 VIISAPSADAPMFVGMV<br>HEKYDNSLK |           |          |              |
| 3308.5642                  | 3308.6765                                                      | 0.1123             | 34             | 3          | 30 VDIVAINDPFIDLNMYVM<br>FOYDSTHGK |           |          |              |

| <b>10</b>                  | <b>MDH2 [Homo sapiens]</b> | <b>gi 49168580</b> | <b>35536.8</b> | <b>70</b> | <b>99.935</b>                 | <b>16</b> | <b>78.164</b> |              |
|----------------------------|----------------------------|--------------------|----------------|-----------|-------------------------------|-----------|---------------|--------------|
| <b>Peptide Information</b> |                            |                    |                |           |                               |           |               |              |
| Calc. Mass                 | Obsrv. Mass                | ± da ± ppm         | Start Seq.     | End Seq.  | Sequence                      | Ion Score | C. I. %       | Modification |
| 1221.6837                  | 1221.6976                  | 0.0139             | 11             | 325       | 335 ASIKKGEDFVK               |           |               |              |
| 1233.7201                  | 1233.7793                  | 0.0592             | 48             | 166       | 176 IFGVTTLDIVR               |           |               |              |
| 1233.7201                  | 1233.7793                  | 0.0592             | 48             | 166       | 176 IFGVTTLDIVR               | 16        | 78.164        |              |
| 1281.6982                  | 1281.7611                  | 0.0629             | 49             | 92        | 104 GCDVVVIPAGVPR             |           |               |              |
| 1327.6714                  | 1327.7172                  | 0.0458             | 34             | 258       | 269 FVFSLVDAAMNGK             |           |               |              |
| 1352.8372                  | 1352.7909                  | -0.0563            | -42            | 2         | 14 LSLALYRVSAAAR              |           |               |              |
| 1454.7056                  | 1454.7694                  | 0.0638             | 44             | 242       | 257 AGAGSATSLSMAYAGAR         |           |               |              |
| 1515.8451                  | 1515.8148                  | -0.0303            | -20            | 315       | 328 MISDAIPELKASIK            |           |               |              |
| 1560.8016                  | 1560.8658                  | 0.0642             | 41             | 216       | 229 VDFPQDQLTALTGR            |           |               |              |
| 1560.8016                  | 1560.8658                  | 0.0642             | 41             | 216       | 229 VDFPQDQLTALTGR            |           |               |              |
| 1601.8645                  | 1601.8942                  | 0.0297             | 19             | 177       | 191 ANTFVAELKGLDPAAR          |           |               |              |
| 1793.0894                  | 1793.1414                  | 0.052              | 29             | 27        | 45 VAVLGAASGGIQGLSLLL<br>K    |           |               |              |
| 2143.1658                  | 2143.2273                  | 0.0615             | 29             | 158       | 176 HGVYNNPKIFGVTTLDIV<br>R   |           |               |              |
| 2365.2397                  | 2365.3191                  | 0.0794             | 34             | 53        | 74 LTLYDIAHTPGVAADLSHI<br>ETK |           |               |              |
| 2365.2397                  | 2365.3191                  | 0.0794             | 34             | 53        | 74 LTLYDIAHTPGVAADLSHI<br>ETK |           |               |              |

| <b>4</b>                   | <b>uracil DNA glycosylase [Homo sapiens]</b> | <b>gi 35053</b> | <b>35470.1</b> | <b>52</b> | <b>96.065</b>                      |           |         |              |
|----------------------------|----------------------------------------------|-----------------|----------------|-----------|------------------------------------|-----------|---------|--------------|
| <b>Peptide Information</b> |                                              |                 |                |           |                                    |           |         |              |
| Calc. Mass                 | Obsrv. Mass                                  | ± da ± ppm      | Start Seq.     | End Seq.  | Sequence                           | Ion Score | C. I. % | Modification |
| 1645.9093                  | 1645.9619                                    | 0.0526          | 32             | 219       | 233 VIPELNGKLTGMFAFR               |           |         |              |
| 1763.8022                  | 1763.8685                                    | 0.0663          | 38             | 309       | 322 LISWYDNEFGYSNR                 |           |         |              |
| 1763.8022                  | 1763.8685                                    | 0.0663          | 38             | 309       | 322 LISWYDNEFGYSNR                 |           |         |              |
| 2041.1075                  | 2041.1807                                    | 0.0732          | 36             | 67        | 84 LVINGNPITIFQERDPSK              |           |         |              |
| 2041.1075                  | 2041.1807                                    | 0.0732          | 36             | 67        | 84 LVINGNPITIFQERDPSK              |           |         |              |
| 2113.1399                  | 2113.2173                                    | 0.0774          | 37             | 62        | 80 AENGLKLVINGNPITIFQER            |           |         |              |
| 2213.1091                  | 2213.1819                                    | 0.0728          | 33             | 119       | 139 VIISAPSADAPMFVGMV<br>HEK       |           |         |              |
| 2213.1091                  | 2213.1819                                    | 0.0728          | 33             | 119       | 139 VIISAPSADAPMFVGMV<br>HEK       |           |         |              |
| 2277.0378                  | 2277.1165                                    | 0.0787          | 35             | 87        | 107 WGDAGAEYVVESTGVFT<br>TMEK      |           |         |              |
| 2540.3467                  | 2540.3562                                    | 0.0095          | 4              | 62        | 84 AENGLKLVINGNPITIFQER<br>DPSK    |           |         |              |
| 2595.3599                  | 2595.4463                                    | 0.0864          | 33             | 163       | 186 VHDNFGIVEGLMTTVHAI<br>TATQK    |           |         |              |
| 2595.3599                  | 2595.4463                                    | 0.0864          | 33             | 163       | 186 VHDNFGIVEGLMTTVHAI<br>TATQK    |           |         |              |
| 2933.4534                  | 2933.5596                                    | 0.1062          | 36             | 119       | 145 VIISAPSADAPMFVGMV<br>HEKYDNSLK |           |         |              |
| 3308.5642                  | 3308.6765                                    | 0.1123          | 34             | 28        | 55 VDIVAINDPFIDLNMYVM<br>FOYDSTHGK |           |         |              |

|                     |                     |                      |                           |                      |                        |                           |                          |
|---------------------|---------------------|----------------------|---------------------------|----------------------|------------------------|---------------------------|--------------------------|
| <b>Spot Idx/Pos</b> | <b>169/G18</b>      | <b>25</b>            | <b>Instr./Spot Origin</b> | <b>ab4700/042810</b> | <b>Process Status</b>  | <b>Analysis Succeeded</b> |                          |
| <b>Plate #/Name</b> | <b>[1] 042810</b>   |                      | <b>4700 Sample Name</b>   |                      | <b>Spectra</b>         | <b>13</b>                 |                          |
| <b>Rank</b>         | <b>Protein Name</b> | <b>Accession No.</b> | <b>Protein MW</b>         | <b>Protein Score</b> | <b>Protein C. I. %</b> | <b>Total Ion Score</b>    | <b>Total Ion C. I. %</b> |

| Spot                | Protein Name                                              | Accession No. | Protein MW         | Protein Score     | Protein C. I. % | Total Ion Score    | Total Ion C. I. % | Process Status | Analysis Succeeded |
|---------------------|-----------------------------------------------------------|---------------|--------------------|-------------------|-----------------|--------------------|-------------------|----------------|--------------------|
| 1                   | NME1-NME2 protein [Homo sapiens]                          | gi 66392203   | 30117.6            | 172               | 100             | 14                 | 88.077            |                |                    |
| Peptide Information |                                                           |               |                    |                   |                 |                    |                   |                |                    |
| Calc. Mass          | Obsrv. Mass                                               | ± da ± ppm    | Start Seq.         | End Sequence Seq. | Ion Score       | C. I. %            | Modification      |                |                    |
| 977.5964            | 977.5933                                                  | -0.0031       | -3                 | 150               | 157             |                    |                   |                |                    |
| 984.6199            | 984.6278                                                  | 0.0079        | 8                  | 134               | 142             |                    |                   |                |                    |
| 984.6199            | 984.6278                                                  | 0.0079        | 8                  | 19                | 27              |                    |                   |                |                    |
| 1069.5636           | 1069.5635                                                 | 0.0001        | 0                  | 230               | 230             |                    |                   |                |                    |
| 1175.6571           | 1175.6639                                                 | 0.0068        | 6                  | 172               | 181             |                    |                   |                |                    |
| 1175.6571           | 1175.6639                                                 | 0.0068        | 6                  | 172               | 181             |                    |                   |                |                    |
| 1344.7633           | 1344.7697                                                 | 0.0064        | 5                  | 122               | 133             |                    |                   |                |                    |
| 1344.7633           | 1344.7697                                                 | 0.0064        | 5                  | 7                 | 18              |                    |                   | 15             | 90.107             |
| 1516.8845           | 1516.8929                                                 | 0.0084        | 6                  | 134               | 146             |                    |                   |                |                    |
| 1710.8809           | 1710.8773                                                 | -0.0036       | -2                 | 158               | 171             |                    |                   |                |                    |
| 1785.9163           | 1785.9221                                                 | 0.0058        | 3                  | 204               | 220             |                    |                   |                |                    |
| 1785.9163           | 1785.9221                                                 | 0.0058        | 3                  | 89                | 105             |                    |                   |                |                    |
| 1895.9789           | 1895.9728                                                 | -0.0061       | -3                 | 244               | 258             |                    |                   |                |                    |
| 2073.1279           | 2073.1257                                                 | -0.0022       | -1                 | 165               | 181             |                    |                   |                |                    |
| 2073.1279           | 2073.1257                                                 | -0.0022       | -1                 | 165               | 181             |                    |                   |                |                    |
| 2093.0557           | 2093.0549                                                 | -0.0008       | 0                  | 182               | 200             |                    |                   |                |                    |
| 2311.1855           | 2311.1824                                                 | -0.0031       | -1                 | 240               | 258             |                    |                   |                |                    |
| 2311.1855           | 2311.1824                                                 | -0.0031       | -1                 | 240               | 258             |                    |                   |                |                    |
| 2407.2261           | 2407.2288                                                 | 0.0027        | 1                  | 182               | 203             |                    |                   |                |                    |
| 2867.5203           | 2867.5078                                                 | -0.0125       | -4                 | 158               | 181             |                    |                   |                |                    |
| 2867.5203           | 2867.5078                                                 | -0.0125       | -4                 | 158               | 181             |                    |                   |                |                    |
| 3361.7312           | 3361.741                                                  | 0.0098        | 3                  | 230               | 258             |                    |                   |                |                    |
| 4                   | Putative nucleoside diphosphate kinase (NDK) (NDP kinase) | gi 3914116    | 15519              | 51                | 95.159          |                    |                   |                |                    |
| Peptide Information |                                                           |               |                    |                   |                 |                    |                   |                |                    |
| Calc. Mass          | Obsrv. Mass                                               | ± da ± ppm    | Start Seq.         | End Sequence Seq. | Ion Score       | C. I. %            | Modification      |                |                    |
| 1069.5636           | 1069.5635                                                 | -0.0001       | 0                  | 100               | 109             |                    |                   |                |                    |
| 1175.6571           | 1175.6639                                                 | 0.0068        | 6                  | 42                | 51              |                    |                   |                |                    |
| 1175.6571           | 1175.6639                                                 | 0.0068        | 6                  | 42                | 51              |                    |                   |                |                    |
| 1785.9163           | 1785.9221                                                 | 0.0058        | 3                  | 74                | 90              |                    |                   |                |                    |
| 1785.9163           | 1785.9221                                                 | 0.0058        | 3                  | 74                | 90              |                    |                   |                |                    |
| 2073.1279           | 2073.1257                                                 | -0.0022       | -1                 | 35                | 51              |                    |                   |                |                    |
| 2073.1313           | 2073.1257                                                 | -0.0056       | -3                 | 17                | 34              |                    |                   |                |                    |
| 2093.0557           | 2093.0549                                                 | -0.0008       | 0                  | 52                | 70              |                    |                   |                |                    |
| 2407.2261           | 2407.2288                                                 | 0.0027        | 1                  | 52                | 73              |                    |                   |                |                    |
| Spot Idx/Pos        | 170/G20                                                   | 26            | Instr./Spot Origin | ab4700/042810     | Process Status  | Analysis Succeeded |                   |                |                    |
| Plate [#] Name      | [1] 042810                                                |               | 4700 Sample Name   |                   | Spectra         | 13                 |                   |                |                    |
| Rank                | Protein Name                                              | Accession No. | Protein MW         | Protein Score     | Protein C. I. % | Total Ion Score    | Total Ion C. I. % |                |                    |
| 1                   | NME1-NME2 protein [Homo sapiens]                          | gi 66392203   | 30117.6            | 163               | 100             | 29                 | 99.785            |                |                    |
| Peptide Information |                                                           |               |                    |                   |                 |                    |                   |                |                    |
| Calc. Mass          | Obsrv. Mass                                               | ± da ± ppm    | Start Seq.         | End Sequence Seq. | Ion Score       | C. I. %            | Modification      |                |                    |
| 911.4733            | 911.4702                                                  | -0.0031       | -3                 | 143               | 149             |                    |                   |                |                    |
| 984.6199            | 984.6236                                                  | 0.0037        | 4                  | 19                | 27              |                    |                   |                |                    |
| 984.6199            | 984.6236                                                  | 0.0037        | 4                  | 134               | 142             |                    |                   |                |                    |
| 994.4774            | 994.4841                                                  | 0.0067        | 7                  | 221               | 229             |                    |                   |                |                    |
| 994.4774            | 994.4841                                                  | 0.0067        | 7                  | 106               | 114             |                    |                   |                |                    |
| 1069.5636           | 1069.5569                                                 | -0.0067       | -6                 | 230               | 230             |                    |                   |                |                    |
| 1175.6571           | 1175.6576                                                 | 0.0005        | 0                  | 172               | 181             |                    |                   |                |                    |
| 1175.6571           | 1175.6576                                                 | 0.0005        | 0                  | 172               | 181             |                    |                   |                |                    |
| 1344.7633           | 1344.764                                                  | 0.0007        | 1                  | 122               | 133             |                    |                   |                |                    |
| 1344.7633           | 1344.764                                                  | 0.0007        | 1                  | 7                 | 18              |                    |                   |                |                    |
| 1516.8845           | 1516.88                                                   | -0.0045       | -3                 | 134               | 146             |                    |                   |                |                    |
| 1710.8809           | 1710.8801                                                 | -0.0008       | 0                  | 158               | 171             |                    |                   |                |                    |
| 1785.9163           | 1785.9178                                                 | 0.0015        | 1                  | 89                | 105             |                    |                   |                |                    |
| 1785.9163           | 1785.9178                                                 | 0.0015        | 1                  | 204               | 220             |                    |                   |                |                    |
| 1895.9789           | 1895.9713                                                 | -0.0076       | -4                 | 244               | 258             |                    |                   |                |                    |
| 2073.1279           | 2073.1345                                                 | 0.0066        | 3                  | 165               | 181             |                    |                   |                |                    |
| 2093.0557           | 2093.0532                                                 | -0.0025       | -1                 | 182               | 200             |                    |                   |                |                    |
| 2311.1855           | 2311.1882                                                 | 0.0027        | 1                  | 240               | 258             |                    |                   |                |                    |
| 2761.376            | 2761.376                                                  | 0             | 0                  | 204               | 229             |                    |                   |                |                    |
| 2867.5203           | 2867.4978                                                 | -0.0225       | -8                 | 158               | 181             |                    |                   |                |                    |
| 7                   | Putative nucleoside diphosphate kinase (NDK) (NDP kinase) | gi 3914116    | 15519              | 63                | 99.649          | 9                  | 76.913            |                |                    |
| Peptide Information |                                                           |               |                    |                   |                 |                    |                   |                |                    |
| Calc. Mass          | Obsrv. Mass                                               | ± da ± ppm    | Start Seq.         | End Sequence Seq. | Ion Score       | C. I. %            | Modification      |                |                    |
| 911.4733            | 911.4702                                                  | -0.0031       | -3                 | 13                | 19              |                    |                   |                |                    |
| 994.4774            | 994.4841                                                  | 0.0067        | 7                  | 91                | 99              |                    |                   |                |                    |
| 994.4774            | 994.4841                                                  | 0.0067        | 7                  | 91                | 99              |                    |                   |                |                    |
| 1069.5636           | 1069.5569                                                 | -0.0067       | -6                 | 100               | 109             |                    |                   |                |                    |
| 1175.6571           | 1175.6576                                                 | 0.0005        | 0                  | 42                | 51              |                    |                   |                |                    |
| 1175.6571           | 1175.6576                                                 | 0.0005        | 0                  | 42                | 51              |                    |                   |                |                    |
| 1785.9163           | 1785.9178                                                 | 0.0015        | 1                  | 74                | 90              |                    |                   |                |                    |
| 1785.9163           | 1785.9178                                                 | 0.0015        | 1                  | 74                | 90              |                    |                   |                |                    |
| 2073.1313           | 2073.1345                                                 | 0.0032        | 2                  | 17                | 34              |                    |                   |                |                    |
| 2093.0557           | 2093.0532                                                 | -0.0025       | -1                 | 52                | 70              |                    |                   |                |                    |
| 2761.376            | 2761.376                                                  | 0             | 0                  | 74                | 99              |                    |                   |                |                    |
| 8                   | RNA binding motif protein 3 isoform a [Homo sapiens]      | gi 5803137    | 17160              | 41                | 41.804          |                    |                   |                |                    |
| Peptide Information |                                                           |               |                    |                   |                 |                    |                   |                |                    |
| Calc. Mass          | Obsrv. Mass                                               | ± da ± ppm    | Start Seq.         | End Sequence Seq. | Ion Score       | C. I. %            | Modification      |                |                    |
| 867.4067            | 867.4026                                                  | -0.0041       | -5                 | 132               | 139             |                    |                   |                |                    |
| 1437.5665           | 1437.5724                                                 | 0.0059        | 4                  | 146               | 157             |                    |                   |                |                    |
| 1437.5665           | 1437.5724                                                 | 0.0059        | 4                  | 146               | 157             |                    |                   |                |                    |
| 1606.6992           | 1606.7145                                                 | 0.0153        | 10                 | 139               | 152             |                    |                   |                |                    |
| 1730.7556           | 1730.754                                                  | -0.0016       | -1                 | 117               | 131             |                    |                   |                |                    |
| 1730.7556           | 1730.754                                                  | -0.0016       | -1                 | 117               | 131             |                    |                   |                |                    |
| 1981.9589           | 1981.9657                                                 | 0.0068        | 3                  | 48                | 65              |                    |                   |                |                    |
| 1981.9589           | 1981.9657                                                 | 0.0068        | 3                  | 48                | 65              |                    |                   |                |                    |
| 2225.092            | 2225.1077                                                 | 0.0157        | 7                  | 46                | 65              |                    |                   |                |                    |
| 2227.9023           | 2227.9102                                                 | 0.0079        | 4                  | 139               | 157             |                    |                   |                |                    |
| 2227.9023           | 2227.9102                                                 | 0.0079        | 4                  | 139               | 157             |                    |                   |                |                    |





|           |           |         |     |      |                        |
|-----------|-----------|---------|-----|------|------------------------|
| 952.5502  | 952.5398  | -0.0104 | -11 | 342  | 349 IAYFTLPK           |
| 1059.6196 | 1059.6069 | -0.0127 | -12 | 879  | 888 YGVIVVGNPK         |
| 1099.5742 | 1099.5876 | 0.0134  | 12  | 245  | 253 IPSEGEGLR          |
| 1107.5792 | 1107.5837 | 0.0045  | 4   | 689  | 698 AGLSGLFLER         |
| 1135.7673 | 1135.7666 | -0.0007 | -1  | 699  | 708 LVLVLRPIR          |
| 1135.7673 | 1135.7666 | -0.0007 | -1  | 699  | 708 LVLVLRPIR          |
| 1182.6953 | 1182.7019 | 0.0066  | 6   | 929  | 939 KLVNTINPGAR        |
| 1206.5282 | 1206.5421 | 0.0139  | 12  | 940  | 949 FMTTAMVDAR         |
| 1206.5282 | 1206.5421 | 0.0139  | 12  | 940  | 949 FMTTAMVDAR         |
| 1218.7244 | 1218.7244 | 0       | 0   | 190  | 200 NVFLGLPIPAK        |
| 1222.6249 | 1222.6359 | 0.011   | 9   | 919  | 928 ESLMDFSKPR         |
| 1223.7106 | 1223.699  | -0.0116 | -9  | 908  | 918 VLVEGLNNLR         |
| 1223.7106 | 1223.699  | -0.0116 | -9  | 908  | 918 VLVEGLNNLR         |
| 1286.7578 | 1286.7611 | 0.0033  | 3   | 877  | 888 ARYGVIIVGNPK       |
| 1286.7578 | 1286.7611 | 0.0033  | 3   | 877  | 888 ARYGVIIVGNPK       |
| 1364.7793 | 1364.7993 | -0.009  | -7  | 456  | 467 LLGHEVEDVIK        |
| 1380.6542 | 1380.671  | 0.0168  | 12  | 1117 | 1129 AYOHQGVITGLSQY    |
| 1431.7954 | 1431.8002 | 0.0048  | 3   | 510  | 522 TVTSATIVYHLAR      |
| 1431.7954 | 1431.8002 | 0.0048  | 3   | 510  | 522 TVTSATIVYHLAR      |
| 1490.7822 | 1490.7894 | 0.0072  | 5   | 149  | 162 GNTSGSHVNLVLR      |
| 1490.7822 | 1490.7894 | 0.0072  | 5   | 149  | 162 GNTSGSHVNLVLR      |
| 1567.7611 | 1567.7598 | -0.0013 | -1  | 855  | 868 ANEHQIGFLNDPRR     |
| 1567.7611 | 1567.7598 | -0.0013 | -1  | 855  | 868 ANEHQIGFLNDPRR     |
| 1588.827  | 1588.8282 | 0.0012  | 1   | 893  | 904 QPLVNLHLLNYK       |
| 1603.7961 | 1603.7972 | 0.0011  | 1   | 394  | 407 VFDNYGDEIAELR      |
| 1630.8435 | 1630.8455 | 0.002   | 1   | 350  | 363 TDSGNDLVIILR       |
| 1723.8622 | 1723.861  | -0.0012 | -1  | 855  | 869 ANEHQIGFLNDPRR     |
| 1723.8622 | 1723.861  | -0.0012 | -1  | 855  | 869 ANEHQIGFLNDPRR     |
| 1816.8751 | 1816.8787 | 0.0036  | 2   | 440  | 455 TFVAVDTSVGVYIHK    |
| 1824.9126 | 1824.9178 | 0.0052  | 3   | 828  | 843 LYQVEVIASVDFQGR    |
| 1824.9126 | 1824.9178 | 0.0052  | 3   | 828  | 843 LYQVEVIASVDFQGR    |
| 1862.0857 | 1862.0867 | 0.001   | 1   | 492  | 509 TVLQRPLSLIQPPGTGK  |
| 1862.0857 | 1862.0867 | 0.001   | 1   | 492  | 509 TVLQRPLSLIQPPGTGK  |
| 1888.9261 | 1888.934  | 0.0079  | 4   | 812  | 827 SYLVQYMQVSGSLHTK   |
| 1910.0129 | 1910.0179 | 0.005   | 3   | 561  | 577 EADSPVSLALHNDIR    |
| 1910.0129 | 1910.0179 | 0.005   | 3   | 561  | 577 EADSPVSLALHNDIR    |
| 1914.0078 | 1914.0145 | 0.0067  | 4   | 794  | 811 AGAKPDQIGITPYEGQR  |
| 1947.9486 | 1947.9462 | -0.0024 | -1  | 296  | 311 YEDAYQYQNIQFPLVK   |
| 1988.0236 | 1988.0115 | -0.0121 | -6  | 474  | 491 FTAQGLPDLNHSQVYAV  |
| 2000.946  | 2000.9602 | 0.0142  | 7   | 221  | 236 DINWSSQVQWLIQDR    |
| 2047.0302 | 2047.033  | 0.0028  | 1   | 588  | 605 LQQLKDETGELSSADEK  |
| 2144.1245 | 2144.1265 | 0.002   | 1   | 473  | 491 RFTAQGLPDLNHSQVYAV |
| 2153.146  | 2153.1426 | -0.0034 | -2  | 559  | 577 SREADSPVSLALHNDIR  |
| 2308.2295 | 2308.23   | 0.0005  | 0   | 387  | 407 GIGHVIKVPDNYGDEIAE |
| 2308.2295 | 2308.23   | 0.0005  | 0   | 387  | 407 GIGHVIKVPDNYGDEIAE |
| 2538.1406 | 2538.147  | 0.0064  | 3   | 96   | 116 TSQLLAELNFEDEEDTY  |
| 2815.4106 | 2815.4021 | -0.0085 | -3  | 271  | 295 ENPSATLEDLEKPGVDEE |
| 2893.3936 | 2893.3936 | 0       | 0   | 715  | 741 MHPALSAPSNIFYEGLS  |
|           |           |         |     |      | QNGVTAADR              |

| Spot Idx/Pos   | 187/H2       | 29            | Instr./Spot Origin | ab4700/042810 | Process Status  | Analysis Succeeded |                   |
|----------------|--------------|---------------|--------------------|---------------|-----------------|--------------------|-------------------|
| Plate [#] Name | [1] 042810   |               | 4700 Sample Name   |               | Spectra         | 13                 |                   |
| Rank           | Protein Name | Accession No. | Protein MW         | Protein Score | Protein C. I. % | Total Ion Score    | Total Ion C. I. % |

|   |                                                  |             |         |     |     |    |        |
|---|--------------------------------------------------|-------------|---------|-----|-----|----|--------|
| 1 | glutamate dehydrogenase 1 variant [Homo sapiens] | gi 62897195 | 61301.2 | 107 | 100 | 13 | 86.964 |
|---|--------------------------------------------------|-------------|---------|-----|-----|----|--------|

Peptide Information

| Calc. Mass | Obsrv. Mass | $\pm$ da $\pm$ ppm | Start Seq. | End Sequence Seq.           | Ion Score | C. I. % | Modification |
|------------|-------------|--------------------|------------|-----------------------------|-----------|---------|--------------|
| 956.52     | 956.5281    | 0.0081             | 8          | 454 LTFKYR                  |           |         |              |
| 956.52     | 956.5281    | 0.0081             | 8          | 454 LTFKYR                  |           |         |              |
| 963.5258   | 963.5300    | 0.0051             | 5          | 528 YNLGLDLR                |           |         |              |
| 995.5342   | 995.5436    | 0.0094             | 9          | 204 211 RFTMELAK            |           |         |              |
| 1000.4556  | 1000.4669   | 0.0113             | 11         | 69 76 MVEGFDDR              |           |         |              |
| 1000.4556  | 1000.4669   | 0.0113             | 11         | 69 76 MVEGFDDR              |           |         |              |
| 1059.533   | 1059.5468   | 0.0138             | 13         | 445 453 NLNHHVYGR           |           |         |              |
| 1059.533   | 1059.5468   | 0.0138             | 13         | 445 453 NLNHHVYGR           |           |         |              |
| 1394.746   | 1394.748    | 0.002              | 1          | 524 535 TAMKYNLGLDLR        |           |         |              |
| 1425.6281  | 1425.6279   | -0.0002            | 0          | 125 136 DDGSWEVEIYGR        |           |         |              |
| 1425.6281  | 1425.6279   | -0.0002            | 0          | 125 136 DDGSWEVEIYGR        | 1         |         | 0            |
| 1488.828   | 1488.8413   | 0.0133             | 9          | 35 50 GOPAAAPQPLGALAAAR     |           |         |              |
| 1491.726   | 1491.7263   | 0.0003             | 0          | 504 516 DVHVSGLAYTMR        |           |         |              |
| 1543.8325  | 1543.8275   | -0.005             | -3         | 77 90 GASVDEKLVEDLR         |           |         |              |
| 1543.8325  | 1543.8275   | -0.005             | -3         | 77 90 GASVDEKLVEDLR         | 12        |         | 81.881       |
| 1581.7291  | 1581.7305   | 0.0014             | 1          | 124 136 RDDGSWEVEIYGR       |           |         |              |
| 1737.8918  | 1737.8822   | -0.0096            | -6         | 481 496 HGGTIPVPTAEFQDR     |           |         |              |
| 1737.8918  | 1737.8822   | -0.0096            | -6         | 481 496 HGGTIPVPTAEFQDR     |           |         |              |
| 1748.89    | 1748.8826   | -0.0074            | -4         | 303 318 TFVVGQFGNVGLHSMR    |           |         |              |
| 1748.89    | 1748.8826   | -0.0074            | -4         | 303 318 TFVVGQFGNVGLHSMR    |           |         |              |
| 1837.0516  | 1837.0535   | 0.0019             | 1          | 108 123 IIKPCNHVLSLSPPIR    |           |         |              |
| 1837.0516  | 1837.0535   | 0.0019             | 1          | 108 123 IIKPCNHVLSLSPPIR    |           |         |              |
| 1915.9218  | 1915.9131   | -0.0087            | -5         | 213 231 GFIFGPDVDPADMSTGE   |           |         |              |
|            |             |                    |            | R                           |           |         |              |
| 1920.912   | 1920.9061   | -0.0059            | -3         | 461 476 DSNYHLLMSVQESLER    |           |         |              |
| 1920.912   | 1920.9061   | -0.0059            | -3         | 461 476 DSNYHLLMSVQESLER    |           |         |              |
| 1959.0381  | 1959.0212   | -0.0169            | -9         | 347 363 ELEDKPLCHLSLGFPK    |           |         |              |
| 1993.1527  | 1993.1251   | -0.0276            | -14        | 108 124 IIKPCNHVLSLSPPIR    |           |         |              |
| 2044.0167  | 2044.0094   | -0.0073            | -4         | 212 231 KGFIFGPDVDPADMSTG   |           |         |              |
|            |             |                    |            | ER                          |           |         |              |
| 2049.0068  | 2049.0005   | -0.0063            | -3         | 461 477 DSNYHLLMSVQESLERK   |           |         |              |
| 2164.0703  | 2164.0613   | -0.009             | -4         | 497 516 ISGASEKDIVHSLAYTM   |           |         |              |
|            |             |                    |            | ER                          |           |         |              |
| 2164.0703  | 2164.0613   | -0.009             | -4         | 497 516 ISGASEKDIVHSLAYTM   |           |         |              |
|            |             |                    |            | ER                          |           |         |              |
| 2242.1714  | 2242.1565   | -0.0149            | -7         | 400 420 IIAEGANGPTTPEADKIFL |           |         |              |
|            |             |                    |            | ER                          |           |         |              |
| 2242.1714  | 2242.1565   | -0.0149            | -7         | 400 420 IIAEGANGPTTPEADKIFL |           |         |              |

|   |                                                                                                |             |         |    |        |  |  |
|---|------------------------------------------------------------------------------------------------|-------------|---------|----|--------|--|--|
| 7 | ATP synthase, H+ transporting, mitochondrial F1 complex, beta subunit precursor [Homo sapiens] | gi 32189394 | 56524.6 | 40 | 25.028 |  |  |
|---|------------------------------------------------------------------------------------------------|-------------|---------|----|--------|--|--|

Peptide Information

| Calc. Mass | Obsrv. Mass | $\pm$ da $\pm$ ppm | Start Seq. | End Sequence Seq.           | Ion Score | C. I. % | Modification |
|------------|-------------|--------------------|------------|-----------------------------|-----------|---------|--------------|
| 1385.7992  | 1385.7094   | 0.0002             | 0          | 144 155 IMNVIGEPIDER        |           |         |              |
| 1406.881   | 1406.8974   | 0.0164             | 12         | 226 239 AHGGSVYFAGVGQER     |           |         |              |
| 1435.7539  | 1435.7715   | 0.0176             | 12         | 311 324 FTQAQSEVYALLGR      |           |         |              |
| 1439.7892  | 1439.7858   | -0.0034            | -2         | 282 294 VALTGLTVAEYFR       |           |         |              |
| 1601.8103  | 1601.8223   | 0.012              | 7          | 265 279 VALVYGMNEPPGAR      |           |         |              |
| 1650.9172  | 1650.9092   | -0.008             | -5         | 95 109 LVLEVAQHLGESTVLR     |           |         |              |
| 1650.9172  | 1650.9092   | -0.008             | -5         | 95 109 LVLEVAQHLGESTVLR     |           |         |              |
| 1789.0225  | 1789.9465   | -0.013             | -7         | 144 159 IMNVIGEPIDERSPIK    |           |         |              |
| 1815.8694  | 1815.8885   | 0.0191             | 11         | 407 422 IMDPNVYGVSEHYDVAR   |           |         |              |
| 1988.0334  | 1988.0197   | -0.0137            | -7         | 388 406 AIAELGIYPAVDPLDSTSR |           |         |              |
| 2023.0105  | 2023.0178   | 0.0073             | 4          | 463 480 FLSQPFQVAEVFTGHMG   |           |         |              |
|            |             |                    |            | K                           |           |         |              |
| 2266.0842  | 2266.0862   | 0.002              | 1          | 325 345 IPSAVGYQPLATDMGT    |           |         |              |
|            |             |                    |            | MQER                        |           |         |              |
| 2318.1445  | 2318.1326   | -0.0119            | -5         | 240 259 TREGNDLVHEMESGVIN   |           |         |              |

3338.7014 3338.7253 0.0239 7 295

LK  
DOEGQDVLFDINFRFT  
QAGSEVSALLGR

ab4700/042810

Process Status  
Analysis Succeeded

|                |              |               |                    |               |                 |                    |
|----------------|--------------|---------------|--------------------|---------------|-----------------|--------------------|
| Spot Idx/Pos   | 188/H4       | 30            | Instr./Spot Origin | ab4700/042810 | Process Status  | Analysis Succeeded |
| Plate [#] Name | [1] 042810   |               | 4700 Sample Name   |               | Spectra         | 13                 |
| Rank           | Protein Name | Accession No. | Protein MW         | Protein Score | Protein C. I. % | Total Ion Score    |

| Rank                | Protein Name                                                 | Accession No. | Protein MW | Protein Score | Protein C. I. % | Total Ion Score     | Total Ion C. I. % |
|---------------------|--------------------------------------------------------------|---------------|------------|---------------|-----------------|---------------------|-------------------|
| 1                   | Chain A, Structure Of Human Glutamate Dehydrogenase-Apo Form | gi 20151      | 55973.4    | 198           | 100             |                     | 23 #              |
| Peptide Information |                                                              |               |            |               |                 |                     |                   |
| Calc. Mass          | Obsrv. Mass                                                  | ± da ± ppm    | Start Seq. | End Sequence  | Ion Score       | C. I. %             | Modification      |
| 905.4323            | 905.4658                                                     | 0.0335        | 37         | 40            | 46              | ESEEQKR             |                   |
| 956.52              | 956.5453                                                     | 0.0253        | 26         | 401           | 407             | LTFKYER             |                   |
| 956.52              | 956.5453                                                     | 0.0253        | 26         | 401           | 407             | LTFKYER             |                   |
| 963.5258            | 963.5499                                                     | 0.0241        | 25         | 475           | 482             | YNLGLDLR            |                   |
| 1000.4556           | 1000.4904                                                    | 0.0348        | 35         | 16            | 23              | MVEGFDDR            | 6                 |
| 1000.4556           | 1000.4904                                                    | 0.0348        | 35         | 16            | 23              | MVEGFDDR            | 0                 |
| 1059.533            | 1059.5614                                                    | 0.0284        | 27         | 392           | 400             | NLNHVSYGR           |                   |
| 1394.746            | 1394.7701                                                    | 0.0241        | 17         | 471           | 482             | TAMKYNLGLDLR        |                   |
| 1425.6281           | 1425.6548                                                    | 0.0267        | 19         | 72            | 83              | DDGSWEIEGYR         |                   |
| 1425.6281           | 1425.6548                                                    | 0.0267        | 19         | 72            | 83              | DDGSWEIEGYR         | 6                 |
| 1491.726            | 1491.7567                                                    | 0.0307        | 21         | 451           | 463             | DIVHSGLAYTMR        |                   |
| 1543.8325           | 1543.8599                                                    | 0.0274        | 18         | 24            | 37              | GASIVEDKLVEDLR      | 10                |
| 1543.8325           | 1543.8599                                                    | 0.0274        | 18         | 24            | 37              | GASIVEDKLVEDLR      | 37.458            |
| 1581.7291           | 1581.7565                                                    | 0.0274        | 17         | 71            | 83              | DDGSWEIEGYR         |                   |
| 1737.8918           | 1737.9161                                                    | 0.0243        | 14         | 428           | 443             | HGGTIPVPTAEFQDR     |                   |
| 1737.8918           | 1737.9161                                                    | 0.0243        | 14         | 428           | 443             | HGGTIPVPTAEFQDR     |                   |
| 1748.89             | 1748.9139                                                    | 0.0239        | 14         | 250           | 265             | TFVVGQFVGLHSMR      |                   |
| 1748.89             | 1748.9139                                                    | 0.0239        | 14         | 250           | 265             | TFVVGQFVGLHSMR      |                   |
| 1837.0516           | 1837.0806                                                    | 0.029         | 16         | 55            | 70              | IIKPCNHVLSLSPPIR    |                   |
| 1837.0516           | 1837.0806                                                    | 0.029         | 16         | 55            | 70              | IIKPCNHVLSLSPPIR    |                   |
| 1915.9218           | 1915.9493                                                    | 0.0275        | 14         | 160           | 178             | GFVGGIDVPAPDMSTGE   |                   |
| 1920.912            | 1920.9424                                                    | 0.0304        | 16         | 408           | 423             | DSNYHLLMSVOESLER    |                   |
| 1920.912            | 1920.9424                                                    | 0.0304        | 16         | 408           | 423             | DSNYHLLMSVOESLER    |                   |
| 1933.0024           | 1932.9475                                                    | -0.0549       | -28        | 131           | 147             | AGVKINPKNYTDNELEK   |                   |
| 1958.0381           | 1958.0604                                                    | 0.0223        | 11         | 294           | 310             | ELEDFKLOHGSILGFPK   |                   |
| 1958.0381           | 1958.0604                                                    | 0.0223        | 11         | 294           | 310             | ELEDFKLOHGSILGFPK   |                   |
| 1993.1527           | 1993.1589                                                    | 0.0062        | 3          | 55            | 71              | IIKPCNHVLSLSPPIR    |                   |
| 2044.0167           | 2044.0457                                                    | 0.029         | 14         | 159           | 178             | KGFIGPGIDVPAPDMSTG  |                   |
| 2044.0167           | 2044.0457                                                    | 0.029         | 14         | 159           | 178             | KGFIGPGIDVPAPDMSTG  |                   |
| 2049.0068           | 2049.0439                                                    | 0.0371        | 18         | 408           | 424             | DSNYHLLMSVOESLER    |                   |
| 2164.0703           | 2164.1028                                                    | 0.0325        | 15         | 444           | 463             | ISGASEKDIVHSGLAYTMR |                   |
| 2164.0703           | 2164.1028                                                    | 0.0325        | 15         | 444           | 463             | ISGASEKDIVHSGLAYTMR |                   |
| 2242.1714           | 2242.2017                                                    | 0.0303        | 14         | 347           | 367             | IIAEGANGPTTPEADKIFL |                   |
| 2242.1714           | 2242.2017                                                    | 0.0303        | 14         | 347           | 367             | IIAEGANGPTTPEADKIFL |                   |
| 2318.1975           | 2318.209                                                     | 0.0115        | 5          | 250           | 269             | TFVVGQFVGLHSMRY     |                   |
| 2441.3035           | 2441.3164                                                    | 0.0129        | 5          | 345           | 367             | AKIAEGANGPTTPEADKI  |                   |
| 2497.2139           | 2497.2927                                                    | 0.0788        | 32         | 405           | 424             | YERDSNYHLLMSVOESLER |                   |
| 2603.3384           | 2603.3323                                                    | -0.0061       | -2         | 95            | 118             | GGIRYSTDVSDVEVKALA  |                   |
| 2742.4211           | 2742.4666                                                    | 0.0455        | 17         | 368           | 391             | NIMVIPDLNAGGVTVS    |                   |
| 3045.4885           | 3045.5374                                                    | 0.0489        | 16         | 266           | 293             | YLHFRFGAKIAVGSDDGS  |                   |
| 3782.9363           | 3782.9573                                                    | 0.021         | 6          | 368           | 400             | NIMVIPDLNAGGVTVS    |                   |

| Rank                | Protein Name                                                                                   | Accession No. | Protein MW | Protein Score | Protein C. I. % | Total Ion Score    | Total Ion C. I. % |
|---------------------|------------------------------------------------------------------------------------------------|---------------|------------|---------------|-----------------|--------------------|-------------------|
| 6                   | ATP synthase, H+ transporting, mitochondrial F1 complex, beta subunit precursor [Homo sapiens] | gi 32189      | 56524.6    | 84            | 99.997          |                    |                   |
| Peptide Information |                                                                                                |               |            |               |                 |                    |                   |
| Calc. Mass          | Obsrv. Mass                                                                                    | ± da ± ppm    | Start Seq. | End Sequence  | Ion Score       | C. I. %            | Modification      |
| 1385.7092           | 1385.7341                                                                                      | 0.0249        | 18         | 144           | 155             | IMNVGEPIDER        |                   |
| 1406.681            | 1406.7242                                                                                      | 0.0432        | 31         | 226           | 239             | AHGYVVFAGVGER      |                   |
| 1435.7539           | 1435.762                                                                                       | 0.0281        | 20         | 311           | 324             | FTDAGSEVSALLGR     |                   |
| 1439.7892           | 1439.8136                                                                                      | 0.0244        | 17         | 282           | 294             | VALTGLTVAEYR       |                   |
| 1601.8103           | 1601.8384                                                                                      | 0.0281        | 18         | 265           | 279             | VALYVGOMNEPPGAR    |                   |
| 1650.9172           | 1650.9451                                                                                      | 0.0279        | 17         | 95            | 109             | LVLEVAQHLGESTVR    |                   |
| 1748.8561           | 1748.9139                                                                                      | 0.0578        | 33         | 45            | 62              | DYAAQTSPPKAGAATG   |                   |
| 1748.8561           | 1748.9139                                                                                      | 0.0578        | 33         | 45            | 62              | DYAAQTSPPKAGAATG   |                   |
| 1780.9625           | 1780.9805                                                                                      | 0.018         | 10         | 144           | 159             | IMNVGEPIDERGPIK    |                   |
| 1815.8694           | 1815.9052                                                                                      | 0.0358        | 20         | 407           | 422             | IMDPNIVGSEHYDVAR   |                   |
| 1988.0334           | 1988.0648                                                                                      | 0.0314        | 16         | 388           | 406             | AAELGIYPAVDRLDSTSR |                   |
| 2023.0105           | 2023.0638                                                                                      | 0.0533        | 26         | 463           | 480             | FLSQPFQVAEFTGHMG   |                   |
| 2060.9956           | 2061.0601                                                                                      | 0.0645        | 31         | 242           | 259             | EKNDLYHEMIESGVINLK |                   |
| 2164.1145           | 2164.1028                                                                                      | -0.0117       | -5         | 35            | 55              | AAPTAVHPVRDAAQTS   |                   |
| 2164.1145           | 2164.1028                                                                                      | -0.0117       | -5         | 35            | 55              | AAPTAVHPVRDAAQTS   |                   |
| 2228.1128           | 2228.1885                                                                                      | 0.0757        | 34         | 407           | 426             | IMDPNIVGSEHYDVAR   |                   |
| 2266.0842           | 2266.1287                                                                                      | 0.0445        | 20         | 325           | 345             | IPSAVGYOPTLATDMGT  |                   |
| 2318.1445           | 2318.209                                                                                       | 0.0645        | 28         | 240           | 259             | TREGNDLYHEMIESGVIN |                   |
| 2732.6045           | 2732.5076                                                                                      | -0.0969       | -35        | 19            | 44              | RLTPSALPPAQLLRAA   |                   |
| 3031.6824           | 3031.5806                                                                                      | -0.1018       | -34        | 63            | 91              | IVAVIGAVDVQFDEGLP  |                   |
| 3714.886            | 3714.8579                                                                                      | -0.0281       | -8         | 352           | 387             | GSITSVQAIYVPADDLTD |                   |

|                |              |               |                    |               |                 |                    |
|----------------|--------------|---------------|--------------------|---------------|-----------------|--------------------|
| Spot Idx/Pos   | 189/H6       | 31            | Instr./Spot Origin | ab4700/042810 | Process Status  | Analysis Succeeded |
| Plate [#] Name | [1] 042810   |               | 4700 Sample Name   |               | Spectra         | 13                 |
| Rank           | Protein Name | Accession No. | Protein MW         | Protein Score | Protein C. I. % | Total Ion Score    |

| Rank                | Protein Name                           | Accession No. | Protein MW | Protein Score | Protein C. I. % | Total Ion Score | Total Ion C. I. % |
|---------------------|----------------------------------------|---------------|------------|---------------|-----------------|-----------------|-------------------|
| 1                   | lactate dehydrogenase A [Homo sapiens] | gi 5031857    | 36665.4    | 150           | 100             | 21              | 97.755            |
| Peptide Information |                                        |               |            |               |                 |                 |                   |
| Calc. Mass          | Obsrv. Mass                            | ± da ± ppm    | Start Seq. | End Sequence  | Ion Score       | C. I. %         | Modification      |
| 833.3748            | 833.3673                               | -0.0075       | -9         | 100           | 106             | QQEGESR         |                   |
| 913.5829            | 913.5765                               | -0.0064       | -7         | 91            | 99              | LVITAGAR        |                   |
| 913.5829            | 913.5765                               | -0.0064       | -7         | 91            | 99              | LVITAGAR        | 21                |
| 1071.5404           | 1071.5294                              | -0.011        | -10        | 170           | 177             | FRYLMGER        |                   |
| 1071.5404           | 1071.5294                              | -0.011        | -10        | 170           | 177             | FRYLMGER        |                   |

|           |           |         |     |     |     |                                |
|-----------|-----------|---------|-----|-----|-----|--------------------------------|
| 1134.5636 | 1134.5571 | -0.0065 | -6  | 306 | 315 | VLTSEEEAR                      |
| 1167.6666 | 1167.6621 | -0.0045 | -4  | 269 | 278 | RVHPVSTMK                      |
| 1167.6566 | 1167.6621 | -0.0045 | -4  | 269 | 278 | RVHPVSTMK                      |
| 1191.5796 | 1191.5812 | 0.0026  | 2   | 158 | 169 | VIGSGCLDSAR                    |
| 1494.748  | 1494.7413 | -0.0067 | -4  | 158 | 171 | VIGSGCLDSARFR                  |
| 1556.8138 | 1556.8066 | -0.0072 | -5  | 100 | 112 | QOEGESRLNLVQR                  |
| 1633.7825 | 1633.7809 | -0.0016 | -1  | 60  | 73  | GEMMDLQHGSLFLR                 |
| 1633.7825 | 1633.7809 | -0.0016 | -1  | 60  | 73  | GEMMDLQHGSLFLR                 |
| 1644.9835 | 1644.9662 | -0.0173 | -11 | 113 | 126 | NNNPKFIPNVVK                   |
| 1874.9814 | 1874.9647 | 0.0033  | 2   | 58  | 73  | LKGEIMDLQHGSLFLR               |
| 1874.9814 | 1874.9647 | 0.0033  | 2   | 58  | 73  | LKGEIMDLQHGSLFLR               |
| 1906.0392 | 1906.0281 | -0.0111 | -6  | 82  | 99  | DYNTANSKLVITAGAR               |
| 1910.9606 | 1910.9519 | -0.0087 | -5  | 213 | 228 | TLHPDLGTDKKEQWK                |
| 2074.0815 | 2074.0828 | 0.0013  | 1   | 6   | 22  | DQLYNLLKKEQTPQNK               |
| 2112.0681 | 2112.0447 | -0.0234 | -11 | 246 | 265 | GYTWSAIGLSVADLAESI<br>MK       |
| 2232.158  | 2232.1401 | -0.0179 | -8  | 285 | 305 | DDVFLSVPCILGQNGISD<br>LVK      |
| 2353.2471 | 2353.2388 | -0.0083 | -4  | 244 | 265 | LKGYTWSAIGLSVADLAE<br>SIMK     |
| 2390.3401 | 2390.3481 | 0.008   | 3   | 77  | 99  | IVSGKDYNTANSKLVIT<br>AGAR      |
| 2863.5273 | 2863.5417 | 0.0144  | 5   | 279 | 305 | GLYIKDDVFLSVPCILG<br>QNGISDLVK |

4 heterogeneous nuclear ribonucleoprotein A2/B1 isoform gi|450447 35983.9 48 89.163

A2 [Homo sapiens]

Peptide Information

| Calc. Mass | Obsrv. Mass | ± da ± ppm | Start Seq. | End Sequence Seq. | Ion Score | C. I. % Modification           |
|------------|-------------|------------|------------|-------------------|-----------|--------------------------------|
| 1013.4434  | 1013.4584   | 0.015      | 15         | 192               | 201       | GGNFGFGDSR                     |
| 1377.6293  | 1377.627    | -0.0023    | -2         | 202               | 216       | GGGNGFGPGGSNFR                 |
| 1377.6293  | 1377.627    | -0.0023    | -2         | 202               | 216       | GGGNGFGPGGSNFR                 |
| 1410.6973  | 1410.6952   | 0.0029     | 6          | 162               | 173       | YHTINGHNAEVR                   |
| 1798.9221  | 1798.938    | 0.0159     | 9          | 11                | 26        | LFIGLSFETTESLSR                |
| 1879.9659  | 1879.9691   | 0.0032     | 2          | 102               | 117       | LFVIGKEDTEEHHLR                |
| 1927.017   | 1927.0332   | 0.0162     | 8          | 10                | 26        | KLFIGLSFETTESLSR               |
| 2189.9053  | 2189.9114   | 0.0061     | 3          | 314               | 338       | NMGGPYGGNYGPGGS<br>GGSGYGGR    |
| 2189.9053  | 2189.9114   | 0.0061     | 3          | 314               | 338       | NMGGPYGGNYGPGGS<br>GGSGYGGR    |
| 2220.0706  | 2220.0769   | 0.0063     | 3          | 118               | 135       | DYFEEYKIDTIEITDR               |
| 2277.155   | 2277.1479   | -0.0071    | -3         | 142               | 161       | FGFVTFDDHDPVKVIL<br>QK         |
| 2495.0393  | 2495.0474   | 0.0081     | 3          | 227               | 254       | QFGDGYNYGGPGGG<br>NFGGSPGYGGGR |

32 Phosphodiesterase 6A, cGMP-specific, rod, alpha gi|112180437 99482.8 22 0

[Homo sapiens]

Peptide Information

| Calc. Mass | Obsrv. Mass | ± da ± ppm | Start Seq. | End Sequence Seq. | Ion Score | C. I. % Modification               |
|------------|-------------|------------|------------|-------------------|-----------|------------------------------------|
| 929.5665   | 929.5605    | -0.006     | -6         | 32                | 40        | LISDLLGAK                          |
| 1011.5581  | 1011.5498   | -0.0093    | -9         | 621               | 629       | LHGSSILER                          |
| 1542.8525  | 1542.8413   | -0.0112    | -7         | 318               | 330       | VIDYILHGKEDIK                      |
| 1784.9146  | 1784.9069   | -0.0077    | -4         | 751               | 765       | TVLQONPIPMMDRNK                    |
| 1784.9146  | 1784.9069   | -0.0077    | -4         | 751               | 765       | TVLQONPIPMMDRNK                    |
| 1886.9969  | 1886.9821   | -0.0148    | -8         | 198               | 213       | VDGSHFKRDEEILLK                    |
| 2249.1138  | 2249.0938   | -0.02      | -9         | 12                | 29        | FLDSNGFAKQYNNLHYR                  |
| 2438.2529  | 2438.2637   | 0.0108     | 4          | 751               | 771       | TVLQONPIPMMDRNKAD<br>ELPK          |
| 2806.4246  | 2806.4207   | -0.0039    | -1         | 556               | 579       | ITYHNWRHGFNVGQTMF<br>SLLVTGK       |
| 2934.5195  | 2934.5176   | -0.0019    | -1         | 555               | 579       | KITYHNWRHGFNVGQTM<br>FSLLVTGK      |
| 3682.876   | 3682.8433   | -0.0327    | -9         | 207               | 236       | DEEILLKYNLFANLIMKVY<br>HLSYLHNCETR |

Spot Idx/Pos 190/H8 32 Instr./Spot Origin ab4700/042810 Process Status Analysis Succeeded

Plate [#] Name [1] 042810 4700 Sample Name Protein MW Protein Score Protein C. I. % Total Ion Score Total Ion C. I. % Spectra 13

Rank Protein Name Accession No. Protein MW Protein Score Protein C. I. % Total Ion Score Total Ion C. I. %

1 lactate dehydrogenase A [Homo sapiens] gi|50318 36665.4 119 100

Peptide Information

| Calc. Mass | Obsrv. Mass | ± da ± ppm | Start Seq. | End Sequence Seq. | Ion Score | C. I. % Modification                         |
|------------|-------------|------------|------------|-------------------|-----------|----------------------------------------------|
| 833.4152   | 833.4354    | 0.0202     | 24         | 223               | 228       | DKEQWK                                       |
| 1011.5656  | 1011.6007   | 0.0351     | 35         | 270               | 278       | VHPVSTMK                                     |
| 1264.6782  | 1264.7018   | 0.0236     | 19         | 233               | 243       | QVYESAVYEVK                                  |
| 1644.9835  | 1645.0377   | 0.0542     | 33         | 113               | 126       | NNNPKFIPNVVK                                 |
| 1657.853   | 1657.8906   | 0.0376     | 23         | 43                | 57        | DLADELALVDVIEDK                              |
| 1799.0359  | 1799.0052   | -0.0307    | -17        | 269               | 284       | RVHPVSTMKGLYGIK                              |
| 1899.032   | 1899.064    | 0.032      | 17         | 43                | 59        | DLADELALVDVIEDKLLK                           |
| 1906.0392  | 1906.1049   | 0.0657     | 34         | 82                | 99        | DYNTANSKLVITAGAR                             |
| 1910.9606  | 1911.0211   | 0.0605     | 32         | 213               | 228       | TLHPDLGTDKKEQWK                              |
| 1933.0682  | 1933.118    | 0.0498     | 26         | 23                | 42        | ITVVGAVGMACAISIL<br>MK                       |
| 1944.1204  | 1944.1799   | 0.0595     | 31         | 133               | 149       | LLIVSNPVDILTYVAVK                            |
| 2112.0681  | 2112.1367   | 0.0686     | 32         | 246               | 265       | GYTWSAIGLSVADLAESI<br>MK                     |
| 2112.0681  | 2112.1367   | 0.0686     | 32         | 246               | 265       | GYTWSAIGLSVADLAESI<br>MK                     |
| 2353.2471  | 2353.3394   | 0.0923     | 39         | 244               | 265       | LKGYTWSAIGLSVADLAE<br>SIMK                   |
| 2390.3401  | 2390.4207   | 0.0806     | 34         | 77                | 99        | IVSGKDYNTANSKLVIT<br>AGAR                    |
| 2495.2961  | 2495.2114   | -0.0847    | -34        | 246               | 268       | GYTWSAIGLSVADLAESI<br>MKNLR                  |
| 2863.5273  | 2863.6221   | 0.0948     | 33         | 279               | 305       | GLYIKDDVFLSVPCILG<br>QNGISDLVK               |
| 3513.7966  | 3513.8669   | 0.0703     | 20         | 43                | 73        | DLADELALVDVIEDKLLG<br>EMMDLQHGSLFLR          |
| 3611.7886  | 3611.8848   | 0.0962     | 27         | 178               | 212       | LGVHPLSCHGWVWLGHEG<br>DSSVPVWSGMNVAGVSL<br>K |

Spot Idx/Pos 191/H10 33 Instr./Spot Origin ab4700/042810 Process Status Analysis Succeeded

Plate [#] Name [1] 042810 4700 Sample Name Protein MW Protein Score Protein C. I. % Total Ion Score Total Ion C. I. % Spectra 13

Rank Protein Name Accession No. Protein MW Protein Score Protein C. I. % Total Ion Score Total Ion C. I. %

1 NME1-NME2 protein [Homo sapiens] gi|6392203 30117.6 118 100

Peptide Information

| Calc. Mass | Obsrv. Mass | ± da ± ppm | Start Seq. | End Sequence Seq. | Ion Score | C. I. % Modification |
|------------|-------------|------------|------------|-------------------|-----------|----------------------|
| 994.4774   | 994.4921    | 0.0147     | 15         | 106               | 114       | GDFCIQVGR            |
| 994.4774   | 994.4921    | 0.0147     | 15         | 221               | 229       | GDFCIQVGR            |
| 1149.6415  | 1149.6565   | 0.015      | 13         | 57                | 66        | DRPFFAGLVK           |
| 1149.6415  | 1149.6565   | 0.015      | 13         | 57                | 66        | DRPFFAGLVK           |
| 1181.597   | 1181.5925   | -0.0045    | -4         | 40                | 49        | FMAQSEDLK            |
| 1344.7633  | 1344.7744   | 0.0111     | 8          | 122               | 133       | TRIAIKPDGVQR         |
| 1344.7633  | 1344.7744   | 0.0111     | 8          | 7                 | 18        | TRIAIKPDGVQR         |

|           |           |         |    |     |     |                   |  |  |  |
|-----------|-----------|---------|----|-----|-----|-------------------|--|--|--|
| 1516.8845 | 1516.8854 | 0.0009  | 1  | 134 | 146 | GLVGEIIRFEQK      |  |  |  |
| 1516.8845 | 1516.8854 | 0.0009  | 1  | 19  | 31  | GLVGEIIRFEQK      |  |  |  |
| 1785.9163 | 1785.927  | 0.0107  | 6  | 89  | 105 | VMLGETNPADSKPGTIR |  |  |  |
| 1785.9163 | 1785.927  | 0.0107  | 6  | 204 | 220 | VMLGETNPADSKPGTIR |  |  |  |
| 2034.0806 | 2034.0894 | 0.0088  | 4  | 50  | 66  | EHYVDLDRPFFAGLVK  |  |  |  |
| 2034.0806 | 2034.0894 | 0.0088  | 4  | 50  | 66  | EHYVDLDRPFFAGLVK  |  |  |  |
| 2066.0261 | 2066.0259 | -0.0002 | 0  | 40  | 56  | FMQASEDLKEHYVDLK  |  |  |  |
| 2066.0261 | 2066.0259 | -0.0002 | 0  | 40  | 56  | FMQASEDLKEHYVDLK  |  |  |  |
| 2116.0718 | 2116.074  | 0.0022  | 1  | 67  | 85  | YMHSGPVVAMVWEGLN  |  |  |  |
|           |           |         |    |     |     | VVK               |  |  |  |
| 2116.0718 | 2116.074  | 0.0022  | 1  | 67  | 85  | YMHSGPVVAMVWEGLN  |  |  |  |
|           |           |         |    |     |     | VVK               |  |  |  |
| 3196.6499 | 3196.6282 | -0.0217 | -7 | 40  | 66  | FMQASEDLKEHYVDLK  |  |  |  |
|           |           |         |    |     |     | DRPFFAGLVK        |  |  |  |

11 Chain A, Nucleoside Triphosphate, Nucleoside Diphosphate Mol\_id: 1; Molecule: Nucleoside Diphosphat gi1421609 17155.9 25 0

Peptide Information

| Calc. Mass | Obsrv. Mass | ± da ± ppm | Start Seq. | End Sequence Seq. | Ion Score | C. I. %           | Modification |
|------------|-------------|------------|------------|-------------------|-----------|-------------------|--------------|
| 994.4774   | 994.4921    | 0.0147     | 15         | 105               | 113       | GDFCIVGR          |              |
| 994.4774   | 994.4921    | 0.0147     | 15         | 105               | 113       | GDFCIVGR          |              |
| 1344.7633  | 1344.7744   | 0.0111     | 8          | 6                 | 17        | TFIAIKPDGVQR      |              |
| 1344.7633  | 1344.7744   | 0.0111     | 8          | 6                 | 17        | TFIAIKPDGVQR      |              |
| 1516.8845  | 1516.8854   | 0.0009     | 1          | 18                | 30        | GLVGEIIRFEQK      |              |
| 1516.8845  | 1516.8854   | 0.0009     | 1          | 18                | 30        | GLVGEIIRFEQK      |              |
| 1785.9163  | 1785.927    | 0.0107     | 6          | 88                | 104       | VMLGETNPADSKPGTIR |              |
| 1785.9163  | 1785.927    | 0.0107     | 6          | 88                | 104       | VMLGETNPADSKPGTIR |              |

Spot Idx/Pos 192/H12 34 Instr./Spot Origin ab4700/042810 Process Status Analysis Succeeded  
 Plate [#] Name [1] 042810 Accession No. Protein MW Protein Score Protein C. I. % Total Ion Score Total Ion C. I. %  
 Rank Protein Name

1 NME1-NME2 protein [Homo sapiens] gi66392203 30117.6 135 100 17 86.888

Peptide Information

| Calc. Mass | Obsrv. Mass | ± da ± ppm | Start Seq. | End Sequence Seq. | Ion Score | C. I. %           | Modification |
|------------|-------------|------------|------------|-------------------|-----------|-------------------|--------------|
| 911.4733   | 911.4838    | 0.0105     | 12         | 143               | 149       | FEQKGFGR          |              |
| 984.6199   | 984.6309    | 0.011      | 11         | 19                | 27        | GLVGEIIR          | 9 5.908      |
| 984.6199   | 984.6309    | 0.011      | 11         | 134               | 142       | GLVGEIIR          |              |
| 1149.6415  | 1149.6497   | 0.0082     | 7          | 57                | 66        | DRPFFAGLVK        |              |
| 1149.6415  | 1149.6497   | 0.0082     | 7          | 57                | 66        | DRPFFAGLVK        |              |
| 1344.7633  | 1344.7748   | 0.0115     | 9          | 122               | 133       | TFIAIKPDGVQR      |              |
| 1344.7633  | 1344.7748   | 0.0115     | 9          | 7                 | 18        | TFIAIKPDGVQR      | 10 31.837    |
| 1516.8845  | 1516.8903   | 0.0058     | 4          | 134               | 146       | GLVGEIIRFEQK      |              |
| 1516.8845  | 1516.8903   | 0.0058     | 4          | 19                | 31        | GLVGEIIRFEQK      |              |
| 1785.9163  | 1785.9252   | 0.0089     | 5          | 204               | 220       | VMLGETNPADSKPGTIR |              |
| 1785.9163  | 1785.9252   | 0.0089     | 5          | 89                | 105       | VMLGETNPADSKPGTIR |              |
| 2034.0806  | 2034.0925   | 0.0119     | 6          | 50                | 66        | EHYVDLDRPFFAGLVK  |              |
| 2034.0806  | 2034.0925   | 0.0119     | 6          | 50                | 66        | EHYVDLDRPFFAGLVK  |              |
| 2066.0261  | 2066.0303   | 0.0042     | 2          | 40                | 56        | FMQASEDLKEHYVDLK  |              |
| 2116.0718  | 2116.0618   | -0.01      | -5         | 67                | 85        | YMHSGPVVAMVWEGLN  |              |
|            |             |            |            |                   |           | VVK               |              |
| 2116.0718  | 2116.0618   | -0.01      | -5         | 67                | 85        | YMHSGPVVAMVWEGLN  |              |
|            |             |            |            |                   |           | VVK               |              |

23 nucleoside diphosphate kinase B gi924935 2058.1 21 0 10 31.837

Peptide Information

| Calc. Mass | Obsrv. Mass | ± da ± ppm | Start Seq. | End Sequence Seq. | Ion Score | C. I. %      | Modification |
|------------|-------------|------------|------------|-------------------|-----------|--------------|--------------|
| 1344.7633  | 1344.7748   | 0.0115     | 9          | 7                 | 18        | TFIAIKPDGVQR |              |
| 1344.7633  | 1344.7748   | 0.0115     | 9          | 7                 | 18        | TFIAIKPDGVQR | 10 31.837    |
