# Supplementary material
Source: PubMed Central journal article supplement (PMC4955699)
Supplement: NIHMS777364-supplement-3.pdf [file NIHMS777364-supplement-3.pdf]

**S2 Fig. related to Fig. 2.**

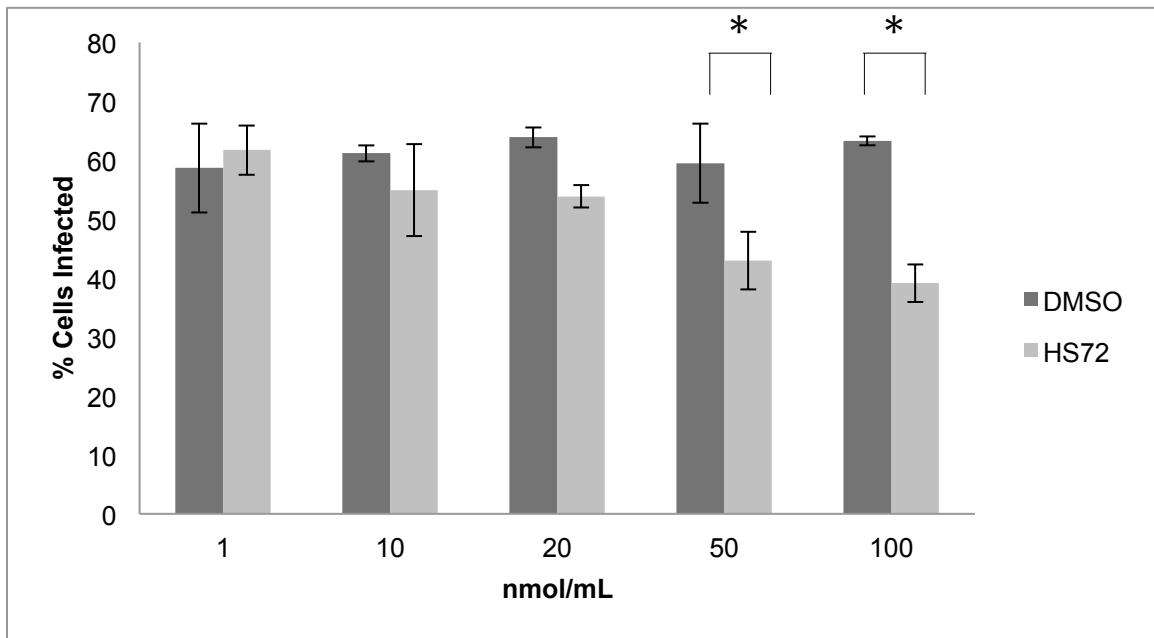

**S2 Fig. HS-72 reduces the percent of DENV infected Huh7 cells.**

The Hsp70i inhibitor, HS-72, yields a dose dependent reduction in DENV infection. Huh7 cells were treated and processed as described in Fig. 2. DENV infection results in 58% of cells infected, with HS-72 reducing infection to 42% of cells infected at 50 nmol/ml, and 39% at 100 nmol/ml. Mean  $\pm$  SEM. \*,  $p < 0.05$  compared to control.
