# Supplementary material
Source: PubMed Central journal article supplement (PMC4955699)
Supplement: NIHMS777364-supplement-4.pdf [file NIHMS777364-supplement-4.pdf]

**S3 Fig. related to Fig. 3.**

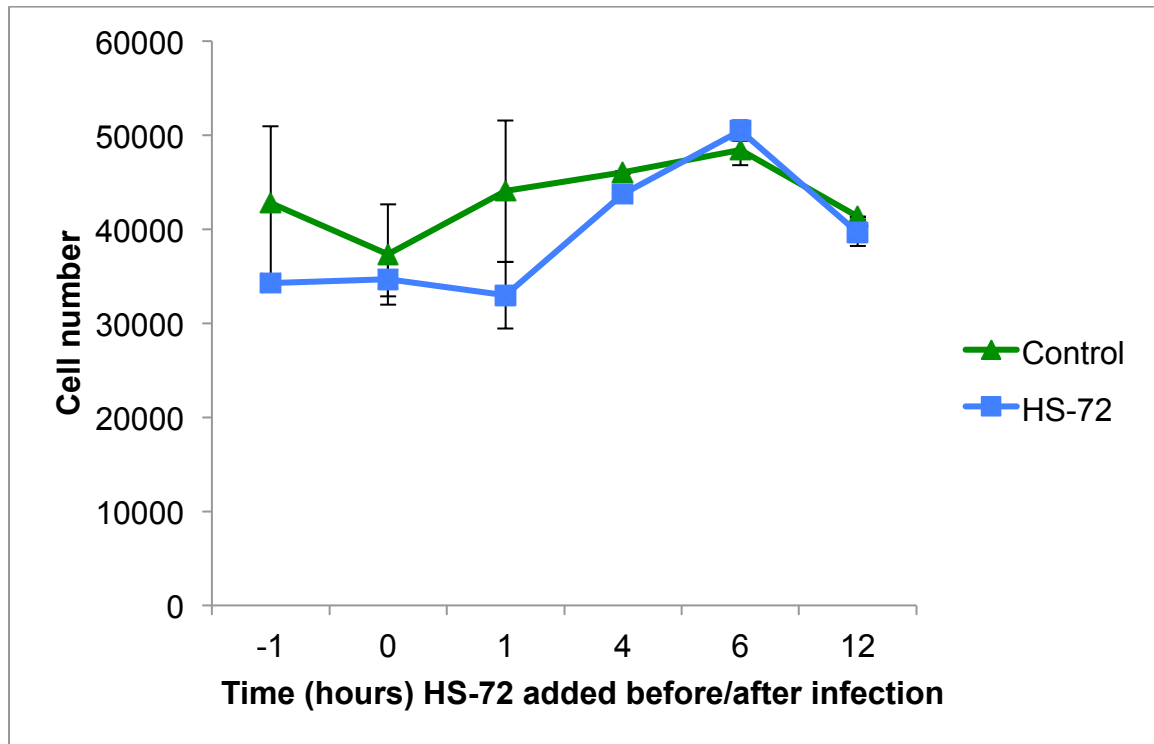

**S3 Fig. Cell number is maintained throughout the time of addition assay between control and HS-72 treated groups, indicating no significant change in cell viability.**

Cell number, corresponding to the time of addition assay, shown in Fig. 3A. HS-72 was added to U937+DC-SIGN cells at the indicated time points (hours), with DENV added to cells at time point 0. At 24 hours post infection, cells were analyzed by Cellomics, using a DENV E protein antibody coupled with a fluorescent secondary antibody to determine cells that are positive for infection, and DAPI to determine cell number. (Mean  $\pm$  SEM).
