# Supplementary material
Source: PubMed Central journal article supplement (PMC4955699)
Supplement: NIHMS777364-supplement-6.pdf [file NIHMS777364-supplement-6.pdf]

**S5 Fig. related to Fig. 5.**

A)

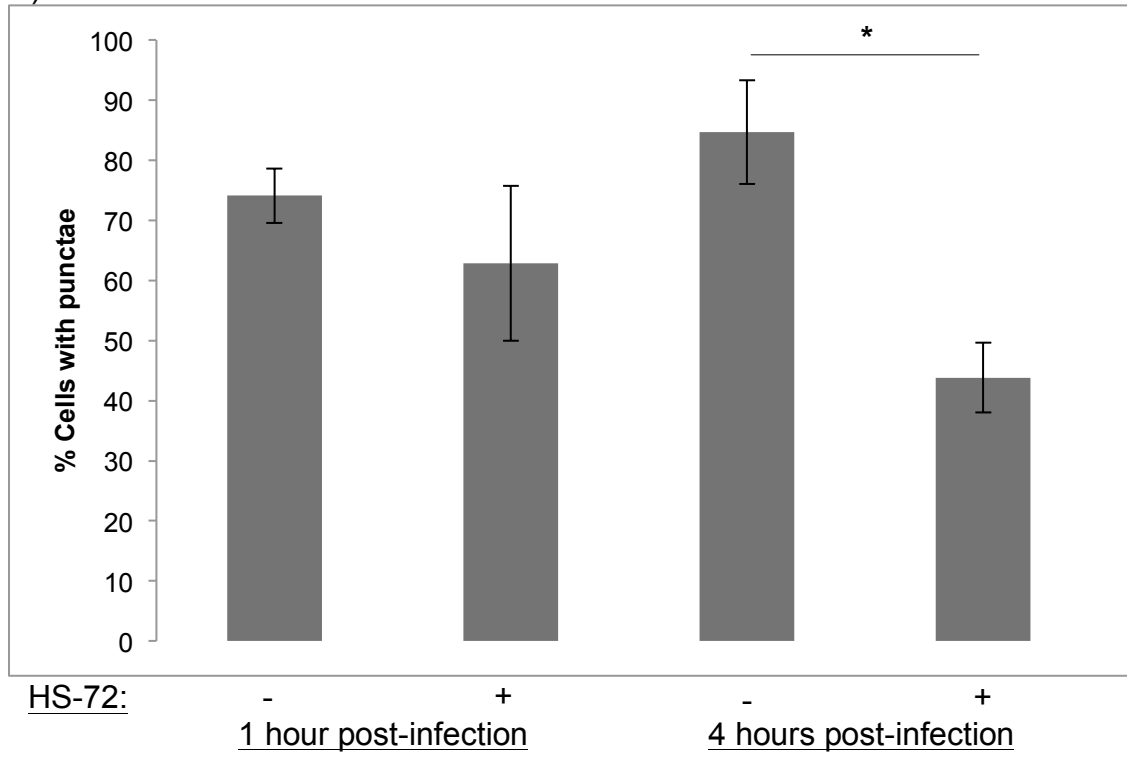

B)

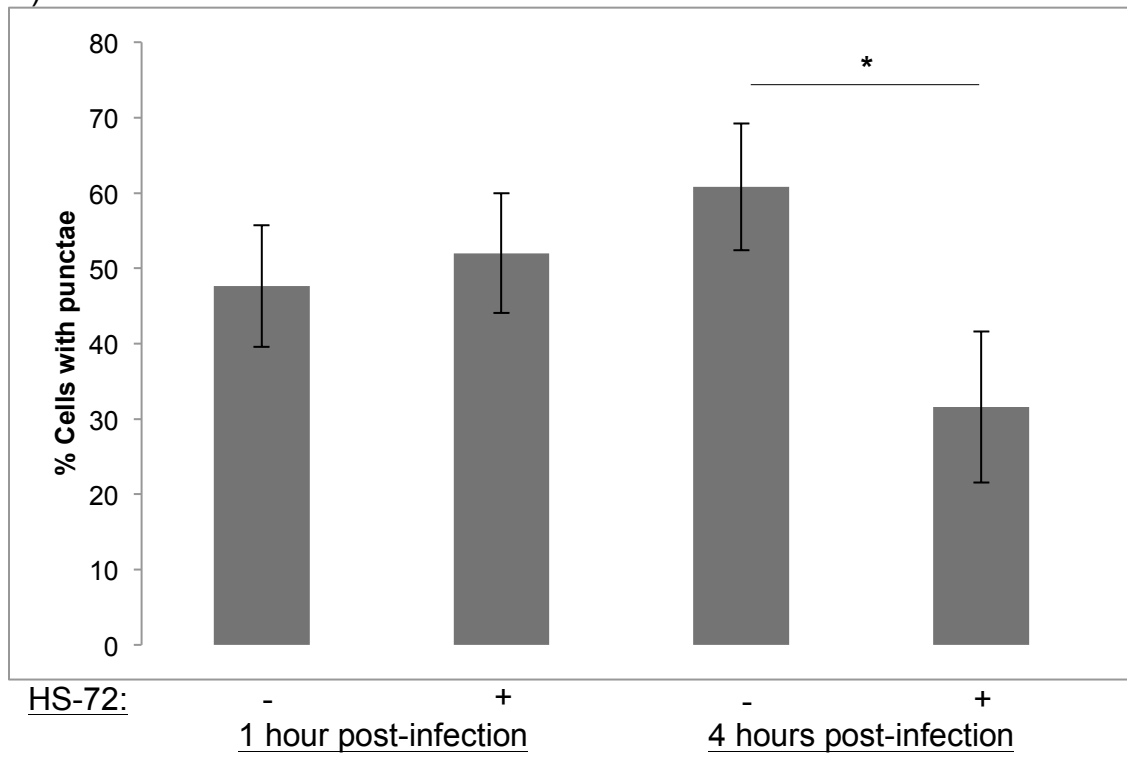

C)

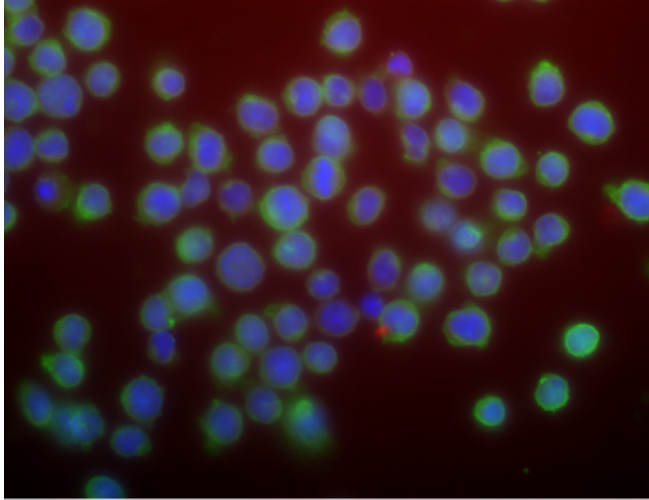

Hsp70i-E protein   DAPI   Membrane

**S5 Fig. Hsp70i interacts with the DENV receptor complex, shown by Proximity Ligation Assay (PLA), which is disrupted by HS-72 treatment.**

A) Quantification of images from PLA, highlighting the reduction in the Hsp70i - E protein interaction in cells treated with HS-72 at 4 hours post-infection. The percentage of cells with red punctae was quantified by counting cell number as well as the number of cells with red punctae, indicating an interaction between Hsp70i and the E protein, for 5 separate fields of view. (Mean  $\pm$  SEM. \*,  $p < 0.05$  compared to control).

(B) Quantification of images from PLA, highlighting the reduction in the Hsp70i - DC-SIGN interaction in cells treated with HS-72 at 4 hours post-infection. The percentage of cells with red punctae was quantified by counting cell number as well as the number of cells with red punctae, indicating an interaction between Hsp70i and DC-SIGN, for 5 separate fields of view. (Mean  $\pm$  SEM. \*,  $p < 0.05$  compared to control).

(C) Cells not treated with primary antibodies show minimal punctae, indicating minimal background fluorescence and highlighting the specificity of PLA. Cells were adhered to cover slips, incubated with WGA-488 to stain membranes, blocked and not incubated with primary antibodies. Secondary antibodies containing PLA probes were added, followed by ligation then amplification solution. Cells were then stained with DAPI and mounted for imaging. Representative images shown. DAPI shown in blue to represent cell nuclei, Green staining represents cell membranes.
